# Supplementary material for: Total syntheses and antiproliferative activities of prenostodione and its analogues
Source: Royal Society of Chemistry journal article supplement (doi:10.1039/d1ob00897h), 2021-01-01
Supplement: d1ob00897h1.pdf [file d1ob00897h1.pdf]

## Supplementary information

### **Total syntheses and antiproliferative activities of prenostodione and its analogues**

Aldahir Ramos Orea,<sup>a</sup> Teresa Ramírez-Apan,<sup>a</sup> Rosa M. Chávez-Santos,<sup>a</sup> Rodrigo Aguayo-Ortiz,<sup>b</sup> Clara Espitia,<sup>c</sup> Mayra Silva Miranda,<sup>c</sup> Rubén O. Torres-Ochoa\*<sup>a</sup> and Roberto Martínez\*<sup>a</sup>

<sup>a</sup>Instituto de Química, Universidad Nacional Autónoma de México, Circuito Exterior, Ciudad Universitaria, Coyoacán, Ciudad de México, 04510, México. E-mail: romar.torres@iquimica.unam.mx; robmar@unam.mx  
www.iquimica.unam.mx

<sup>b</sup>Departamento de Farmacia, Facultad de Química, Universidad Nacional Autónoma de México, Circuito Escolar, Ciudad Universitaria, Coyoacán, Ciudad de México, 04510, México.

<sup>c</sup>Instituto de Investigaciones Biomédicas, Universidad Nacional Autónoma de México, Ciudad Universitaria, Coyoacán, Ciudad de México, 04510, México.

#### **Table of contents**

|                                                                           |            |
|---------------------------------------------------------------------------|------------|
| <b>1. General remarks</b>                                                 | <b>S2</b>  |
| <b>2. Procedures for the synthesis of starting materials</b>              | <b>S2</b>  |
| <b>3. Antiproliferative activity of compounds 3 and 14</b>                | <b>S4</b>  |
| <b>4. Antitubercular activity of compounds 3 and 14</b>                   | <b>S6</b>  |
| <b>5. Physicochemical properties and ADMET prediction of compounds 14</b> | <b>S9</b>  |
| <b>6. Permeability prediction</b>                                         | <b>S12</b> |
| <b>7. Crystallographic data of compound 3i</b>                            | <b>S13</b> |
| <b>8. Copies of <sup>1</sup>H NMR and <sup>13</sup>C NMR spectra</b>      | <b>S14</b> |
| <b>9. High-resolution mass spectroscopy reports</b>                       | <b>S62</b> |
| <b>10. HPLC chromatograms</b>                                             | <b>S70</b> |

## 1. General remarks

Commercially available chemicals were purchased from Merck and Sigma Aldrich.  $^1\text{H}$  NMR and  $^{13}\text{C}$  NMR (300 and 75 MHz, respectively) spectra were acquired in  $\text{CDCl}_3$  and  $\text{DMSO}-d_6$  at  $25^\circ\text{C}$  on a 300 MHz Jeol Eclipse and 300 MHz Fourier Bruker spectrometers. The chemical shifts are reported on the  $\delta$  scale in parts per million (ppm) and calibrated to residual solvents (7.26 ppm in  $\text{CDCl}_3$ ; 2.50 ppm in  $\text{DMSO}-d_6$ ) for  $^1\text{H}$  NMR and (77.16 ppm in  $\text{CDCl}_3$ ; 39.50 ppm in  $\text{DMSO}-d_6$ )  $^{13}\text{C}$  NMR. The peak shapes are indicated as follows: s, singlet; br s, broad singlet; d, doublet; t, triplet; q, quartet; m, multiplet. The coupling constant values ( $J$ ) are reported in Hertz (Hz). Melting points were measured in open capillaries using a Mel-Temp apparatus. IR spectra were obtained using an FTIR Tensor 27 Bruker spectrometer. Mass spectra were recorded with JEOL SX 102 A spectrometers by electronic impact (EI). Reactions were monitored by TLC and visualized by using a dual short-wavelength/long-wavelength UV lamp. Flash column chromatography was carried out on silica gel 60 (230-400 mesh ASTM) from Macherey-Nagel GmbH & Co. All solvents were distilled under a nitrogen atmosphere. Dichloromethane and acetonitrile were distilled from calcium hydride, toluene was distilled from sodium benzophenone ketyl. X-ray diffraction data were obtained from Bruker Smart APEX II CCD diffractometer equipped with graphite monochromatic  $\text{MoK}\alpha$  radiation. HPLC was performed in Agilent 1200 Liquid Chromatograph with Waters 2996 diode array: Luna<sup>®</sup> 3  $\mu\text{m}$  C18(2) 100  $\text{\AA}$  100 x 2 mm; acetonitrile:water-0.1% HOAc (30:70) initial eluent and acetonitrile after 30 minutes; flow = 0.2 mL/min; wavelength 254 nm; sample solvent: dichloromethane.

## 2. Procedures for the synthesis of starting materials

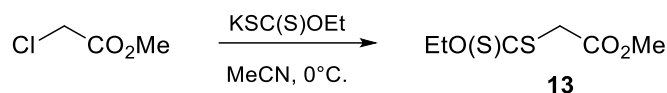

**Methyl 2-((ethoxycarbonothioyl)thio)acetate (13).**<sup>1</sup> This compound was synthesized from methyl chloroacetate (2.85 g, 26.26 mmol) following Gutierrez's method.

Yellow oil (5.02 g, 98%).  $^1\text{H}$  NMR (300 MHz,  $\text{CDCl}_3$ ):  $\delta$  4.63 (q,  $J = 7.2$  Hz, 2H), 3.92 (s, 2H), 3.75 (s, 3H), 1.41 (t,  $J = 7.2$  Hz, 3H).

### Supplementary Table 1. Optimization of the synthesis of ester 12.

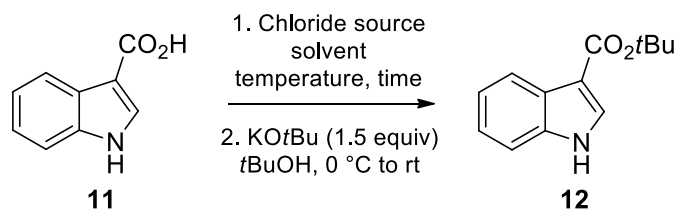

<sup>1</sup> P. E. Reyes-Gutiérrez, R. O. Torres-Ochoa, R. Martínez and L. D. Miranda, *Org. Biomol. Chem.*, 2009, 7, 1388.

| Entry | Chloride source               | Solvent                         | Temperature (°C) | Time (h) | %Yield ( <b>12</b> ) |
|-------|-------------------------------|---------------------------------|------------------|----------|----------------------|
| 1     | (COCl) <sub>2</sub>           | CH <sub>2</sub> Cl <sub>2</sub> | 25               | 6        | 25                   |
| 2     | Undistilled SOCl <sub>2</sub> | Toluene                         | 110              | 6        | 42                   |
| 3     | Distilled SOCl <sub>2</sub>   | Toluene                         | 110              | 6        | 76                   |
| 4     | Distilled SOCl <sub>2</sub>   | Toluene                         | 110              | 4        | 85                   |

**tert-Butyl 1H-indole-3-carboxylate (**12**).**<sup>2</sup> A solution of 1H-indole-3-carboxylic acid (2.33 g, 14.4 mmol, 1 equiv) in anhydrous toluene (25 mL) was added SOCl<sub>2</sub> (26 mL, 361.2 mmol, 25 equiv) dropwise. The mixture was stirred at reflux for 4 h. The reaction mixture was cooled down to room temperature and subsequently a distillation equipment was connected to remove the excess of thionyl chloride and toluene. The complete elimination of both was achieved under reduced pressure. The crude mixture was dissolved in *t*BuOH (25 mL), then KO*t*Bu (4.50 g, 36.2 mmol, 2.5 equiv) was added at 0 °C in three portions. The resulting mixture was stirred at 0 °C for 10 min and 1 h at room temperature. The solvent was removed under reduced pressure and the residue was diluted in CH<sub>2</sub>Cl<sub>2</sub> (30 mL) and water (30 mL). The reaction crude was extracted with CH<sub>2</sub>Cl<sub>2</sub>. The organic phases were combined, dried over Na<sub>2</sub>SO<sub>4</sub>, and concentrated in vacuo. The residue was purified by column chromatography on silica gel eluting with hexane:EtOAc (4:1) to give *tert*-butyl 1H-indole-3-carboxylate (**12**).

Yellow oil (2.06 g, 85%). <sup>1</sup>H NMR (300 MHz, CDCl<sub>3</sub>): δ 9.03 (br s, 1H), 8.18 (m, 1H), 7.84 (d, *J* = 3.0 Hz, 1H), 7.39 (m, 1H), 7.27 (m, 1H), 7.24 (m, 1H), 1.66 (s, 9H); <sup>13</sup>C NMR (75 MHz, CDCl<sub>3</sub>): δ 165.3, 136.3, 131.2, 125.8, 123.0, 121.9, 121.5, 111.7, 110.5, 80.3, 28.7.

**Supplementary Table 2.** Optimization of the synthesis of diester **10**.

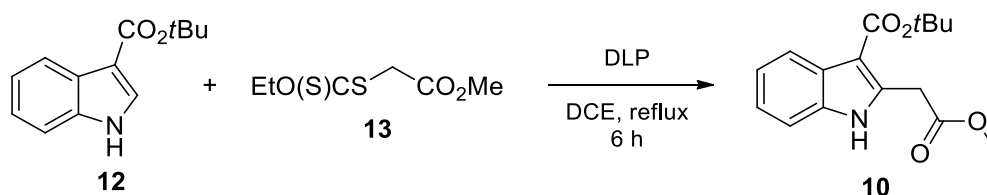

| Entry | DLP (equiv) | %Yield ( <b>10</b> ) |
|-------|-------------|----------------------|
| 1     | 1.2         | 64                   |
| 2     | 1.5         | 67                   |
| 3     | 1.8         | 72                   |

**tert-Butyl 2-(2-methoxy-2-oxoethyl)-1H-indole-3-carboxylate (**10**).** To a refluxing solution of xanthate **13** (0.804 g, 4.1 mmol, 1.2 equiv) and indole **12** (0.75 g, 3.4 mmol, 1 equiv) in degassed 1,2-dichloroethane (10 mL), dilauroyl peroxide (2.48 g, 6.21 mmol, 1.8 equiv) was added portionwise (0.3 equiv/h). The solvent was removed under reduced pressure and the crude was dissolved in CH<sub>3</sub>CN and washed with hexane until the oily layer formed is removed. The polar

<sup>2</sup> J. Ludwig and M. Lehr, *Synth. Commun.*, 2004, **34**, 3691.

phase was concentrated in and purified by column chromatography on silica gel eluting with hexane:EtOAc (9:1) to give the alkylated indole **10**.

Yellow solid (0.718 g, 72%), m. p. 98-100 °C. <sup>1</sup>H NMR (300 MHz, CDCl<sub>3</sub>): δ 9.66 (br s, 1H), 8.10 (dd, *J* = 6.0, 3.0 Hz, 1H), 7.37 (dd, *J* = 6.0, 3.0 Hz, 1H), 7.25-7.20 (m, 2H), 4.38 (s, 2H), 3.79 (s, 3H), 1.66 (s, 9H); <sup>13</sup>C NMR (75 MHz, CDCl<sub>3</sub>): δ 171.6, 165.2, 138.1, 134.9, 126.6, 122.8, 121.8, 121.6, 111.2, 106.8, 80.4, 52.5, 32.3, 28.8. IR (KBr): ν (cm<sup>-1</sup>) 3270, 1737, 1654. HR-MS (EI) *m/z* calcd for C<sub>16</sub>H<sub>19</sub>NO<sub>4</sub> [M + H<sup>+</sup>]: 290.1392; found: 290.1394.

### 3. Antiproliferative activity of compounds **3** and **14**

#### Cell lines and culture medium

The compounds **3** and **14** were screened *in vitro* against six human cancer cell lines: HCT-15 (human colorectal adenocarcinoma), MCF-7 (human mammary adenocarcinoma), K-562 (human chronic myelogenous leukemia), U-251 (human glioblastoma), PC-3 (human prostatic adenocarcinoma), and SKLU-1 (human lung adenocarcinoma) cell lines, supplied by the National Cancer Institute (NCI, USA). The human tumor cytotoxicities were determined following protocols established by the NCI.<sup>3</sup> Compound **14** was also evaluated against COS-7 (noncancerous monkey kidney fibroblast-like-cell-line) supplied by the Hospital General Siglo XXI-IMSS (México). The cell lines were cultured in RPMI-1640 medium supplemented with 10% fetal bovine serum, 2 mM L-glutamine, 10000 units/mL penicillin G sodium, 10000 µg mL<sup>-1</sup> streptomycin sulfate, 25 µg mL<sup>-1</sup> amphotericin B (Gibco), and 1% non-essential amino acids (Gibco). Cells were maintained at 37 °C in a humidified atmosphere with 5% CO<sub>2</sub>. The viability of the cells used in the experiments exceeded 95%, as determined using a trypan blue assay.

#### Cytotoxicity assay

After treating the tumor cells with the test compounds, the cytotoxicity was determined using a protein binding dye, sulforhodamine B (SRB), in a microculture assay to measure cell growth. The cells were removed from the tissue culture flasks by treatment with trypsin and diluted with fresh media. One-hundred microliters of the cell suspension were pipetted into 96 well microtiter plates (Costar), yielding 5000 or 7500 cells per well, and the material was incubated at 37 °C for 24 h in

---

<sup>3</sup> A. Monks, D. Scudiero, P. Skehan, R. Shoemaker, K. Paull, D. Vistica, C. Hose, J. Langley, P. Cronise, A. Vaigro-Wolff, M. Gray-Goodrich, H. Campbell, J. Mayo and M. Boyd, *J. Natl. Cancer Inst.*, 1991, **83**, 757.

a 5% CO<sub>2</sub> atmosphere. Subsequently, a 100 μL aliquot of the test compounds in solution, obtained by dilution of the stock solutions, was added to each well. The cultures were exposed for 48 h to the drug at concentrations ranging from 1-50 μM. After the incubation period, cells were fixed to the plastic substratum by the addition of 50 μL cold 50% aqueous trichloroacetic acid. The plates were incubated at 4 °C for 1 h, washed with tap H<sub>2</sub>O, and air-dried. The trichloroacetic acid-fixed cells were stained by the addition of 0.4% SRB. The free SRB solution was then removed by washing with 1% aqueous acetic acid. The plates were air-dried, and the bound dye was solubilized by the addition of 10 mM unbuffered Tris base (100 μL). The plates were placed on a shaker for 5 min, and the absorption was determined at 515 nm using an ELISA plate reader (Bio-Tex Instruments).

**Supplementary Table 3.** % Inhibition of compounds **3a-k** to the six cancer cell lines (25 μM).

| Comp.     | R                                 | U251<br>SNC | PC-3<br>prostate | K562<br>leukemia | HCT15<br>colon | MCF7<br>breast | SKLU<br>lung |
|-----------|-----------------------------------|-------------|------------------|------------------|----------------|----------------|--------------|
| <b>3a</b> | -OH                               | NA          | 23.8             | 10.5             | 5.27           | 7.5            | 10.8         |
| <b>3b</b> | -H                                | NA          | NA               | NA               | NA             | NA             | NA           |
| <b>3c</b> | -Me                               | NA          | NA               | NA               | NA             | NA             | NA           |
| <b>3d</b> | -OMe                              | 7.1         | NA               | NA               | NA             | NA             | 3.0          |
| <b>3e</b> | -N(CH <sub>3</sub> ) <sub>2</sub> | 7.3         | 21.9             | 32.5             | NA             | 10.6           | 9.2          |
| <b>3f</b> | -NO <sub>2</sub>                  | 24.0        | 0.4              | 7.6              | NA             | 18.5           | 32.3         |
| <b>3g</b> | -CN                               | 10.9        | 2.5              | 29.7             | NA             | 17.2           | 19.5         |
| <b>3h</b> | -CF <sub>3</sub>                  | NA          | NA               | 59.1             | 38.4           | 37.0           | 32.0         |
| <b>3i</b> | -Br                               | NA          | NA               | 19.5             | 32.5           | 33.0           | 26.0         |
| <b>3j</b> | -Cl                               | NA          | NA               | 38.6             | 28.9           | 46.0           | 25.9         |
| <b>3k</b> | -F                                | NA          | NA               | NA               | 5.1            | NA             | 22.5         |

NA = Not active

Active compounds: % Inhibition ≥ 50

**Supplementary Table 4.** % Inhibition of compounds **14a-k** to the six cancer cell lines (25  $\mu$ M).

| Compound   | R                                 | U251<br>CNS | PC-3<br>prostate | K562<br>leukemia | HCT15<br>colon | MCF7<br>breast | SKLU<br>lung | COS-7* |
|------------|-----------------------------------|-------------|------------------|------------------|----------------|----------------|--------------|--------|
| <b>14a</b> | -OH                               | 18.9        | 6.5              | 18.6             | 7.0            | NA             | NA           | 41.3   |
| <b>14b</b> | -H                                | 57.3        | 46.1             | 73.0             | 60.0           | 54.1           | 63.9         | 65.9   |
| <b>14c</b> | -Me                               | 50.6        | 36.7             | 67.1             | 69.3           | 61.6           | 66.5         | 68.1   |
| <b>14d</b> | -OMe                              | 62.5        | 79.0             | 51.7             | 15.6           | 100            | 93.6         | NA     |
| <b>14e</b> | -N(CH <sub>3</sub> ) <sub>2</sub> | 42.0        | 42.0             | 47.9             | 23.6           | 34.0           | 71.7         | 69.5   |
| <b>14f</b> | -NO <sub>2</sub>                  | 57.7        | 16.3             | 50.2             | 24.7           | 52.2           | 63.5         | 30.2   |
| <b>14g</b> | -CN                               | 72.0        | 65.1             | NA               | 52.1           | 2.6            | NA           | 3.0    |
| <b>14h</b> | -CF <sub>3</sub>                  | 21.8        | 25.3             | 43.6             | 68.4           | 47.0           | 54.7         | 61.9   |
| <b>14i</b> | -Br                               | 63.8        | 83.1             | 58.5             | 7.1            | 70.3           | 59.7         | NA     |
| <b>14j</b> | -Cl                               | 55.9        | 71.0             | 67.4             | 48.9           | 53.2           | 68.8         | 49.0   |
| <b>14k</b> | -F                                | 26.3        | 1.1              | 26.9             | 82.6           | 16.6           | 41.5         | 40.4   |

NA = Not active

Active compounds: % Inhibition  $\geq$  50

\*COS-7 = Noncancerous kidney monkey fibroblast-like-cell-line.

#### 4. Antitubercular activity of compounds **3** and **14**

##### In vitro antimycobacterial assay

Stock solutions of all compounds were prepared in 100% DMSO at a concentration of 10 mg/mL. For the resazurin microtiter assay (REMA), the compounds were each diluted in Middlebrook 7H9 broth medium (TH9) without tyloxapol. For reference drugs, stock solutions with a concentration of 64  $\mu$ g/mL were prepared and filtered using a membrane with a pore diameter of 0.22  $\mu$ m (Millipore; Darmstadt, Germany). All working solutions were kept refrigerated at  $-20^{\circ}$ C until they were evaluated.

##### Cell culture

The cytotoxicity assays were carried out using on Vero cell line (from the kidney of an African green monkey) from ATCC. These cells were cultured in RPMI 1640 medium supplemented with 10% fetal bovine serum (FBS) and nonessential amino acids.

### **Cytotoxicity assay**

To assess the cytotoxicity of each tested compound, 10,000 Vero cells were placed in a 96 well plate and incubated for 24 h in 100  $\mu$ L of RPMI medium. After incubation, the plate was washed, and fresh medium containing the compounds in different concentrations was added. Each tested compound was incubated for 48 h at 37 °C under a 5% CO<sub>2</sub> atmosphere. A 10  $\mu$ L MTT solution (5 mg/mL in sterile PBS) was added to each well, and the resulting mixtures were incubated for another 4 h. The medium was then removed, and a volume of 100  $\mu$ L of DMSO was used to solubilize the formazan. The formazan absorbance at 570 nm was measured, and cytotoxicity was calculated as %Toxicity = (1 - (ABS problem/ABS control))  $\times$  100. Controls were cells without treatment but following the same procedures above described.<sup>4</sup>

### ***M. tuberculosis* inocula preparation**

*M. tuberculosis* H37Rv, H37Ra, and 209 strains were cultivated in 7H9–glycerol–10% ADC–0.01% tyloxapol medium at 37 °C until an O.D. of 0.4 at a wavelength of 600 nm was reached. In each case, bacteria working samples were prepared as a 1:25 dilution in 7H9–ADC 10%.

### **Antimicrobial susceptibility test using the REMA**

The assay used here was described previously.<sup>5</sup> In brief, the outer wells of a 96-well plate were each filled with 200  $\mu$ L of sterile PBS to prevent dehydration from occurring during the long (8-day) incubation period. RIF was used as a reference drug (16 -0.001  $\mu$ g/mL serial two-fold dilutions) in each plate, and controls of DMSO, DMSO+Mtb, medium, media+Mtb, and compound alone were included to validate the plate. Compounds were evaluated at various concentrations from 0.98  $\mu$ g/mL to 250  $\mu$ g/mL and in triplicate in independent assays. Plates were incubated for 6 days; then, a volume of 30  $\mu$ L of 0.01% resazurin (weight/volume) (Sigma–Aldrich) was added to each well, and the plates were incubated for an additional 2 days. Visual inspection was used to determine the color of each well: blue was interpreted as no growth, pink

---

<sup>4</sup> T. Mossman, *J. Immunol. Methods*, 1983, **65**, 55.

<sup>5</sup> L. A. Collins and S. G. Franzblau, *Antimicrob. Agents Chemother.*, 1997, **41**, 1004.

as growth. The MIC value for each experiment was defined as the lowest concentration at which the blue color was observed.

### Selectivity index (SI)

SI was obtained using the formula  $SI = IC_{50}$  in Vero cells / MIC100 determined using REMA.

### Minimal bactericidal concentration (MBC)

MBC was assessed for some of the compounds as described previously.<sup>6</sup> Briefly, volumes of 5  $\mu$ L of the undeveloped duplicate bacteria suspensions from REMA were transferred to a new microplate containing 195  $\mu$ L of fresh culture medium per well. Then, microplates were incubated as described for REMA. The MBC values corresponded to the minimum compound concentration that did not cause a color shift in the cultures re-incubated in fresh medium.

**Supplementary Table 5.** Anti-*M. tuberculosis* effects and cytotoxicity of compounds **3a-k**.

| Compound          | R                                | MIC ( $\mu$ g/mL) | IC <sub>50</sub> ( $\mu$ g/mL) | SI      |
|-------------------|----------------------------------|-------------------|--------------------------------|---------|
| <b>3a</b>         | OH                               | 125               | 33.3                           | 0.2664  |
| <b>3b</b>         | H                                | 250               | 643                            | 2.572   |
| <b>3c</b>         | Me                               | 500               | 245                            | 0.49    |
| <b>3d</b>         | OMe                              | 500               | 379                            | 0.758   |
| <b>3e</b>         | N(CH <sub>3</sub> ) <sub>2</sub> | >500              | 307                            | ND      |
| <b>3f</b>         | NO <sub>2</sub>                  | 500               | 363                            | 0.726   |
| <b>3g</b>         | CN                               | 250               | 379                            | 1.516   |
| <b>3h</b>         | CF <sub>3</sub>                  | 250               | 136                            | 0.544   |
| <b>3i</b>         | Br                               | 250               | 211                            | 0.844   |
| <b>3j</b>         | Cl                               | 500               | 237                            | 0.474   |
| <b>3k</b>         | F                                | 500               | 315                            | 0.63    |
| <b>Rifampicin</b> |                                  | 0.06              | >1000                          | >16,666 |

ND = Not determined

<sup>6</sup> G. M. Molina-Salinas, M. C. Ramos-Guerra, J. Vargas-Villarreal, D. B. Mata-Cárdenas, P. Becerril-Montes and S. Said-Fernández, *Arch. Med. Res.*, 2006, **37**, 45.



**Supplementary Table 6.** Anti-*M. tuberculosis* effects and cytotoxicity of compounds **14a-k**.

| Compound          | R                                | MIC ( $\mu\text{g/mL}$ ) | IC <sub>50</sub> ( $\mu\text{g/mL}$ ) | SI      |
|-------------------|----------------------------------|--------------------------|---------------------------------------|---------|
| <b>14a</b>        | OH                               | 250                      | 373                                   | 1.492   |
| <b>14b</b>        | H                                | >500                     | 50.7                                  | ND      |
| <b>14c</b>        | Me                               | >500                     | 280                                   | ND      |
| <b>14d</b>        | OMe                              | >500                     | 356                                   | ND      |
| <b>14e</b>        | N(CH <sub>3</sub> ) <sub>2</sub> | >500                     | 330                                   | ND      |
| <b>14f</b>        | NO <sub>2</sub>                  | 500                      | 144                                   | 0.288   |
| <b>14g</b>        | CN                               | 125                      | 107                                   | 0.856   |
| <b>14h</b>        | CF <sub>3</sub>                  | 500                      | <50                                   | ND      |
| <b>14i</b>        | Br                               | >500                     | 20.8                                  | ND      |
| <b>14j</b>        | Cl                               | 500                      | <50                                   | ND      |
| <b>14k</b>        | F                                | 500                      | 40                                    | 0.08    |
| <b>Rifampicin</b> |                                  | 0.06                     | >1000                                 | >16,666 |

ND = Not determined

## 5. Physicochemical properties and ADMET prediction of compounds 14

The physicochemical properties of **14a-k** were computed with the free ADME-Tox filtering tool FAF-Drugs4.<sup>7</sup> Absorption, metabolism and toxicity were predicted using the consensus result of three different web servers: vNN-ADMET,<sup>8</sup> admetSAR 2.0<sup>9</sup> (unrestricted applicability domain), and pkCSM (Supplementary Table 7).<sup>10</sup> ADMET consensus analysis indicated that these molecules, except for **14h**, are not pumped out of the cell through the P-glycoprotein, but that they could inhibit the activity of this multidrug-resistant protein. Regarding their metabolism (Supplementary Table 8), the molecules could inhibit cytochrome P450 (CYP) isoforms CYP2C9, CYP2C19, and CYP3A4, being also a possible substrate of the latter. Interestingly, they are

<sup>7</sup> D. Lagorce, L. Bouslama, J. Becot, M. A. Miteva and B. O. Villoutreix, *Bioinformatics*, 2017, **33**, 3658.

<sup>8</sup> P. Schyman, R. Liu, V. Desai and A. Wallqvist, *Front. Pharmacol.*, 2017, **8**, 889.

<sup>9</sup> H. Yang, C. Lou, L. Sun, J. Li, Y. Cai, Z. Wang, W. Li, G. Liu and Y. Tang, *Bioinformatics*, 2019, **35**, 1067.

<sup>10</sup> D. E. V. Pires, T. L. Blundell and D. B. Ascher, *J. Med. Chem.*, 2015, **58**, 4066.

unlikely to exhibit mutagenicity, cardiotoxicity, mitochondrial toxicity, cytotoxicity, and skin sensitization, but do have a high risk of damaging the liver (Supplementary Table 9).

**Supplementary Table 7.** Calculated physicochemical properties of the **14a-k** compounds.

| <b>Cmpd</b> | <b>MW</b> | <b>logP</b> | <b>logD</b> | <b>logSw</b> | <b>tPSA</b> | <b>RB</b> | <b>HBD</b> | <b>HBA</b> | <b>HA</b> | <b>PAINS</b> |
|-------------|-----------|-------------|-------------|--------------|-------------|-----------|------------|------------|-----------|--------------|
| <b>14a</b>  | 393.43    | 4.48        | 4.95        | -4.85        | 88.62       | 7         | 2          | 6          | 29        | No           |
| <b>14b</b>  | 377.43    | 4.84        | 5.26        | -4.98        | 68.39       | 7         | 1          | 5          | 28        | No           |
| <b>14c</b>  | 391.46    | 5.20        | 5.77        | -5.29        | 68.39       | 7         | 1          | 5          | 29        | No           |
| <b>14d</b>  | 407.46    | 4.81        | 5.10        | -5.07        | 77.62       | 8         | 1          | 6          | 30        | No           |
| <b>14e</b>  | 420.50    | 4.96        | 5.37        | -5.23        | 71.63       | 8         | 1          | 6          | 31        | No           |
| <b>14f</b>  | 422.43    | 4.66        | 5.20        | -5.08        | 114.21      | 8         | 1          | 8          | 31        | No           |
| <b>14g</b>  | 402.44    | 4.55        | 5.12        | -4.95        | 92.18       | 7         | 1          | 6          | 30        | No           |
| <b>14h</b>  | 445.43    | 5.72        | 6.14        | -5.88        | 68.39       | 8         | 1          | 5          | 32        | No           |
| <b>14i</b>  | 456.33    | 5.53        | 6.03        | -5.91        | 68.39       | 7         | 1          | 5          | 29        | No           |
| <b>14j</b>  | 411.88    | 5.46        | 5.86        | -5.59        | 68.39       | 7         | 1          | 5          | 29        | No           |
| <b>14k</b>  | 395.42    | 4.94        | 5.40        | -5.16        | 68.39       | 7         | 1          | 5          | 29        | No           |

Compound (Cmpd); molecular weight (MW); logarithm of the partition coefficient between *n*-octanol and water (logP); logP of compounds at physiological pH (logD); logarithm of compounds water solubility (logSw); rotatable bonds (RB); hydrogen bond donors (HBD); hydrogen bond acceptors (HBA); heavy atoms (HA); pan-assay interference compounds (PAINS).

**Supplementary Table 8.** Absorption and metabolism predictions of the **14a-k** compounds.

| Cmpd       | Absorption   |               |              |          |          | Metabolism |                  |             |                  |                  |
|------------|--------------|---------------|--------------|----------|----------|------------|------------------|-------------|------------------|------------------|
|            | Lipinski Ro5 | Veber' s rule | Egan' s rule | P-gp inh | P-gp sub | CYP1A2 inh | CYP2C9 inh / sub | CYP2C19 inh | CYP2D6 inh / sub | CYP3A4 inh / sub |
| <b>14a</b> | 0            | Good          | Good         | +        | -        | -          | +/-              | +           | -/-              | +/+              |
| <b>14b</b> | 0            | Good          | Good         | +        | -        | +          | +/-              | +           | -/-              | +/+              |
| <b>14c</b> | 1            | Good          | Good         | +        | -        | -          | +/-              | +           | -/-              | +/+              |
| <b>14d</b> | 0            | Good          | Good         | +        | -        | +          | +/+              | +           | -/-              | +/+              |
| <b>14e</b> | 0            | Good          | Good         | +        | -        | -          | +/-              | +           | -/-              | +/+              |
| <b>14f</b> | 0            | Good          | Good         | +        | -        | -          | +/-              | +           | -/-              | +/+              |
| <b>14g</b> | 0            | Good          | Good         | +        | -        | -          | +/-              | +           | -/-              | +/+              |
| <b>14h</b> | 1            | Good          | Good         | +        | +        | -          | +/-              | +           | -/-              | +/+              |
| <b>14i</b> | 1            | Good          | Good         | +        | -        | -          | +/-              | +           | -/-              | +/+              |
| <b>14j</b> | 1            | Good          | Good         | +        | -        | -          | +/-              | +           | -/-              | +/+              |
| <b>14k</b> | 0            | Good          | Good         | +        | -        | -          | +/-              | +           | -/-              | +/+              |

Compound (Cmpd); Lipinski rule-of-5 (Ro5); P-glycoprotein (P-gp); Cytochromes P450 (CYP); inhibitor (inh); substrate (sub); no inhibitor/substrate (-); inhibitor/substrate (+).

**Supplementary Table 9.** Toxicity prediction of the **14a-k** compounds.

| Compound   | Mutagenicity (AMES test) | Cardiotoxicity (hERG blocker) | Mitochondrial toxicity (MMP) | Hepatotoxicity | DILI | Cytotoxicity | Skin sensitization | AO  |
|------------|--------------------------|-------------------------------|------------------------------|----------------|------|--------------|--------------------|-----|
| <b>14a</b> | +                        | -                             | -                            | +              | +    | -            | -                  | III |
| <b>14b</b> | -                        | -                             | -                            | +              | +    | -            | -                  | III |
| <b>14c</b> | -                        | -                             | -                            | +              | +    | -            | -                  | III |
| <b>14d</b> | -                        | -                             | -                            | +              | +    | -            | -                  | III |
| <b>14e</b> | +                        | -                             | -                            | +              | +    | -            | -                  | III |
| <b>14f</b> | +                        | -                             | -                            | +              | +    | -            | -                  | III |
| <b>14g</b> | -                        | -                             | -                            | +              | +    | -            | -                  | III |
| <b>14h</b> | -                        | -                             | -                            | +              | +    | -            | -                  | III |
| <b>14i</b> | -                        | -                             | -                            | +              | +    | -            | -                  | III |
| <b>14j</b> | -                        | -                             | -                            | +              | +    | -            | -                  | III |
| <b>14k</b> | -                        | -                             | -                            | +              | +    | -            | -                  | III |

Human ether-à-go-go-related gene (hERG); mitochondrial membrane potential (MMP); drug-induced liver injury (DILI); acute oral toxicity category (AO); no risk (-); high risk (+).

## 6. Permeability prediction

The compounds, including their carboxylic acids **3a-k** and *tert*-butyl esters **14a-k**, were generated with Avogadro v1.1.1<sup>11,12</sup> using the prenostodione crystal structure as template (CCDC 1999796). The optimized molecules were energy minimized employing the universal force field (UFF)<sup>13</sup> implemented in Open Babel v2.3.2.<sup>14</sup> Chemicalize tool<sup>15</sup> (<https://chemicalize.com/>, RA-O Academic License) of ChemAxon<sup>16</sup> (<http://www.chemaxon.com>) was used to compute the p*K*<sub>a</sub> values of the carboxylic acid substituents. The coordinate files with the p*K*<sub>a</sub> values assigned to the

<sup>11</sup> Avogadro: An Open-Source Molecular Builder and Visualization Tool. <http://avogadro.cc/>.

<sup>12</sup> M. D. Hanwell, D. E. Curtis, D. C. Lonie, T. Vandermeersch, E. Zurek and G. R. Hutchison, *J. Cheminform.*, 2012, **4**, 17.

<sup>13</sup> A. K. Rappe, C. J. Casewit, K. S. Colwell, W. A. Goddard and W. M. Skiff, *J. Am. Chem. Soc.*, 1992, **114**, 10024.

<sup>14</sup> N. M. O'Boyle, M. Banck, C. A. James, C. Morley, T. Vandermeersch and G. R. Hutchison, *J. Cheminform.*, 2011, **3**, 1.

<sup>15</sup> M. Swain, *J. Chem. Inf. Model.*, 2012, **52**, 613.

<sup>16</sup> H. E. Pence and A. Williams, *J. Chem. Educ.* 2010, **87**, 1123.

carboxylate group oxygens were submitted to PerMM web server<sup>17,18</sup> ( $T = 298$  K,  $pH = 7.0$ ) to predict the passive permeability of each molecule using an implicit solvent model of the DOPC bilayer and the “drag” optimization method.<sup>19</sup> Figures and plots were generated with PyMOL v1.7<sup>20</sup> and Gnuplot v5.2,<sup>21</sup> respectively.

## 7. Crystallographic data of compound **3i**

The single crystal was prepared by diffusing of hexanes into an acetone solution of **3i**.

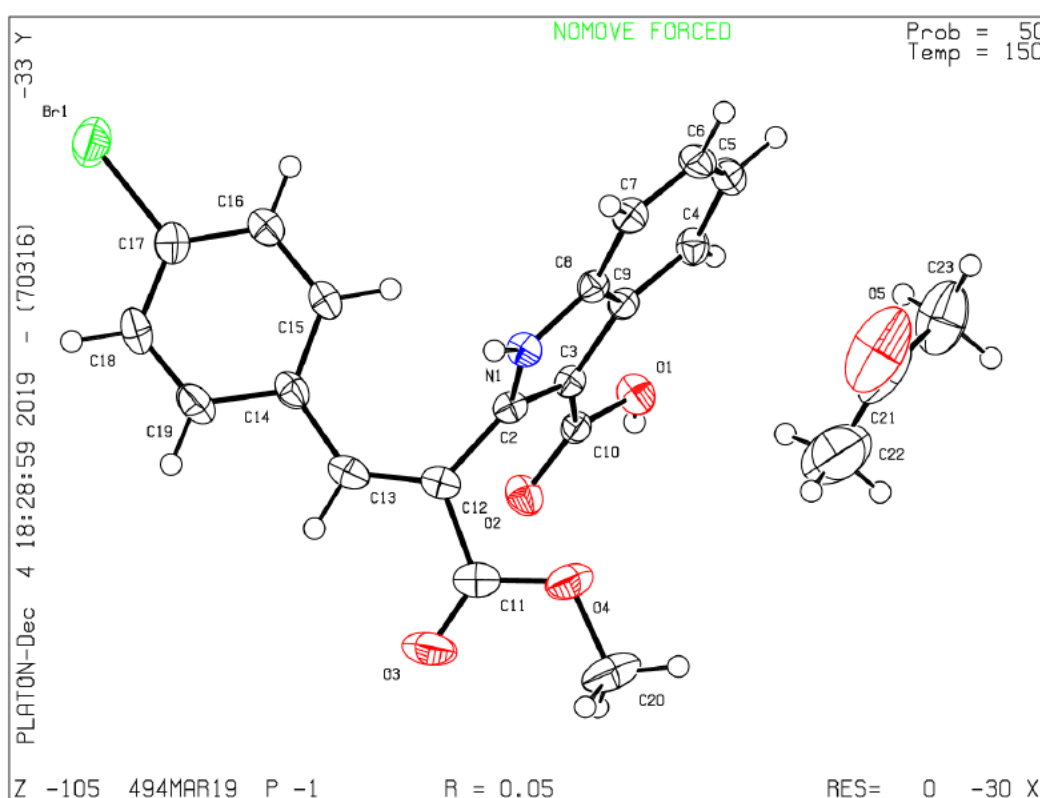

**Supplementary Figure 1** ORTEP drawing of **3i** showing thermal ellipsoids at the 50% probability level. CCDC deposition number 1999796 contains the supplementary crystallographic data for this paper which can be obtained free of charge at <https://www.ccdc.cam.ac.uk/structures/>

<sup>17</sup> A. L. Lomize, J. M. Hage, K. Schnitzer, K. Golobokov, M. B. LaFaive, A. C. Forsyth and I. D. Pogozeva, *J. Chem. Inf. Model.*, 2019, **59**, 3094.

<sup>18</sup> A. L. Lomize and I. D. Pogozeva, *J. Chem. Inf. Model.*, 2019, **59**, 3198.

<sup>19</sup> G. Henkelman, G. Jóhannesson and H. Jónsson, Methods for Finding Saddle Points and Minimum Energy Paths. In *Theoretical Methods in Condensed Phase Chemistry*; Kluwer Academic Publishers: Dordrecht, 2002; pp 269.

<sup>20</sup> L. Schrödinger, *The PyMOL Molecular Graphics System, Version 1.7* Schrödinger, LLC.; 2015.

<sup>21</sup> T. Williams and C. Kelley, Gnuplot: An Interactive Plotting Program. 2016.

---

Bond precision: C-C = 0.0034 Å                      Wavelength=0.71073

Cell:                    a=7.7741(4)                    b=11.2133(6)                    c=13.2379(7)  
                          alpha=71.466(1)                beta=74.538(1)                gamma=81.457(1)

Temperature:        150 K

|                        | Calculated               | Reported                 |
|------------------------|--------------------------|--------------------------|
| Volume                 | 1051.97(10)              | 1051.97(10)              |
| Space group            | P -1                     | P -1                     |
| Hall group             | -P 1                     | -P 1                     |
| Moiety formula         | C19 H14 Br N O4, C3 H6 O | C19 H14 Br N O4, C3 H6 O |
| Sum formula            | C22 H20 Br N O5          | C22 H20 Br N O5          |
| Mr                     | 458.29                   | 458.30                   |
| Dx, g cm <sup>-3</sup> | 1.447                    | 1.447                    |
| Z                      | 2                        | 2                        |
| Mu (mm <sup>-1</sup> ) | 1.986                    | 1.986                    |
| F000                   | 468.0                    | 468.0                    |
| F000'                  | 467.64                   |                          |
| h,k,lmax               | 10,15,18                 | 10,15,18                 |
| Nref                   | 6170                     | 6160                     |
| Tmin,Tmax              | 0.448,0.556              | 0.570,0.746              |
| Tmin'                  | 0.439                    |                          |

Correction method= # Reported T Limits: Tmin=0.570 Tmax=0.746  
AbsCorr = MULTI-SCAN

Data completeness= 0.998                      Theta(max)= 30.098

R(reflections)= 0.0478( 3767)                wR2(reflections)= 0.1067( 6160)

S = 1.011                                              Npar= 272

---

## 8. Copies of <sup>1</sup>H NMR and <sup>13</sup>C NMR spectra

# <sup>1</sup>H and <sup>13</sup>C NMR Spectra of 10

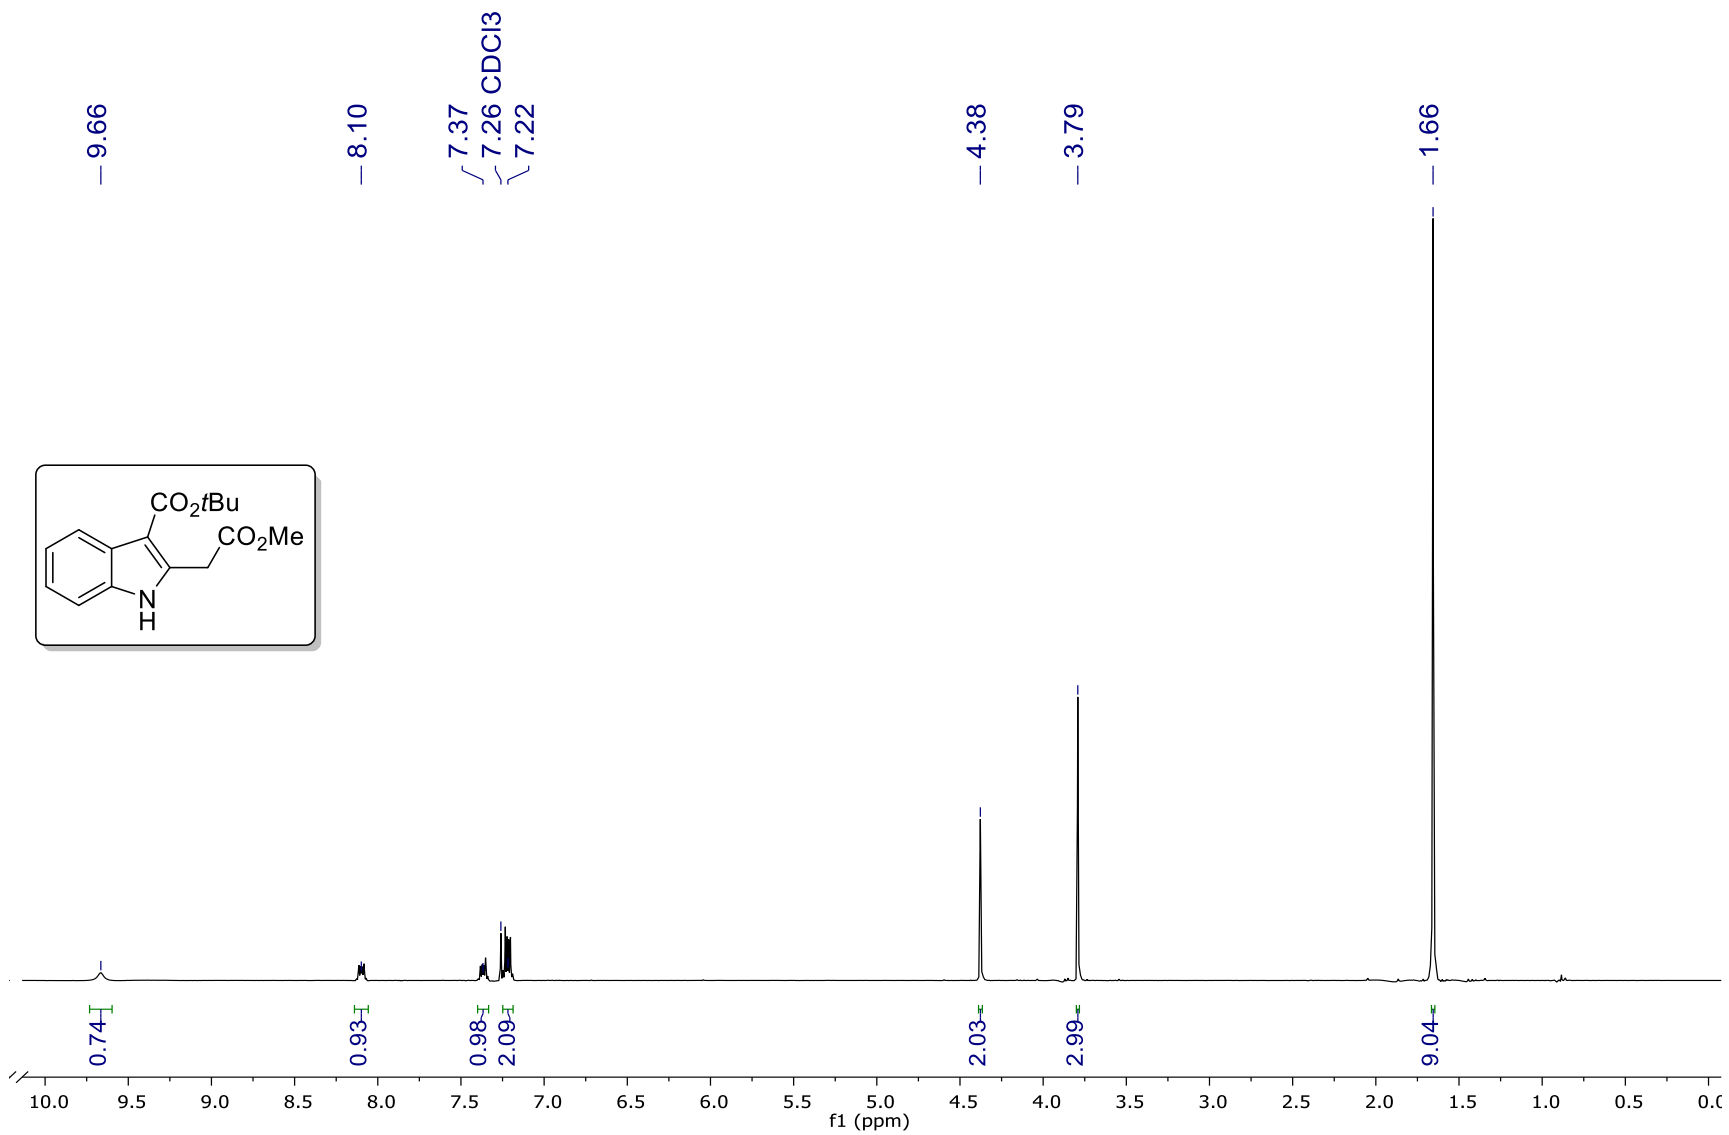

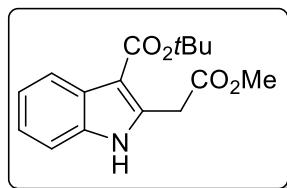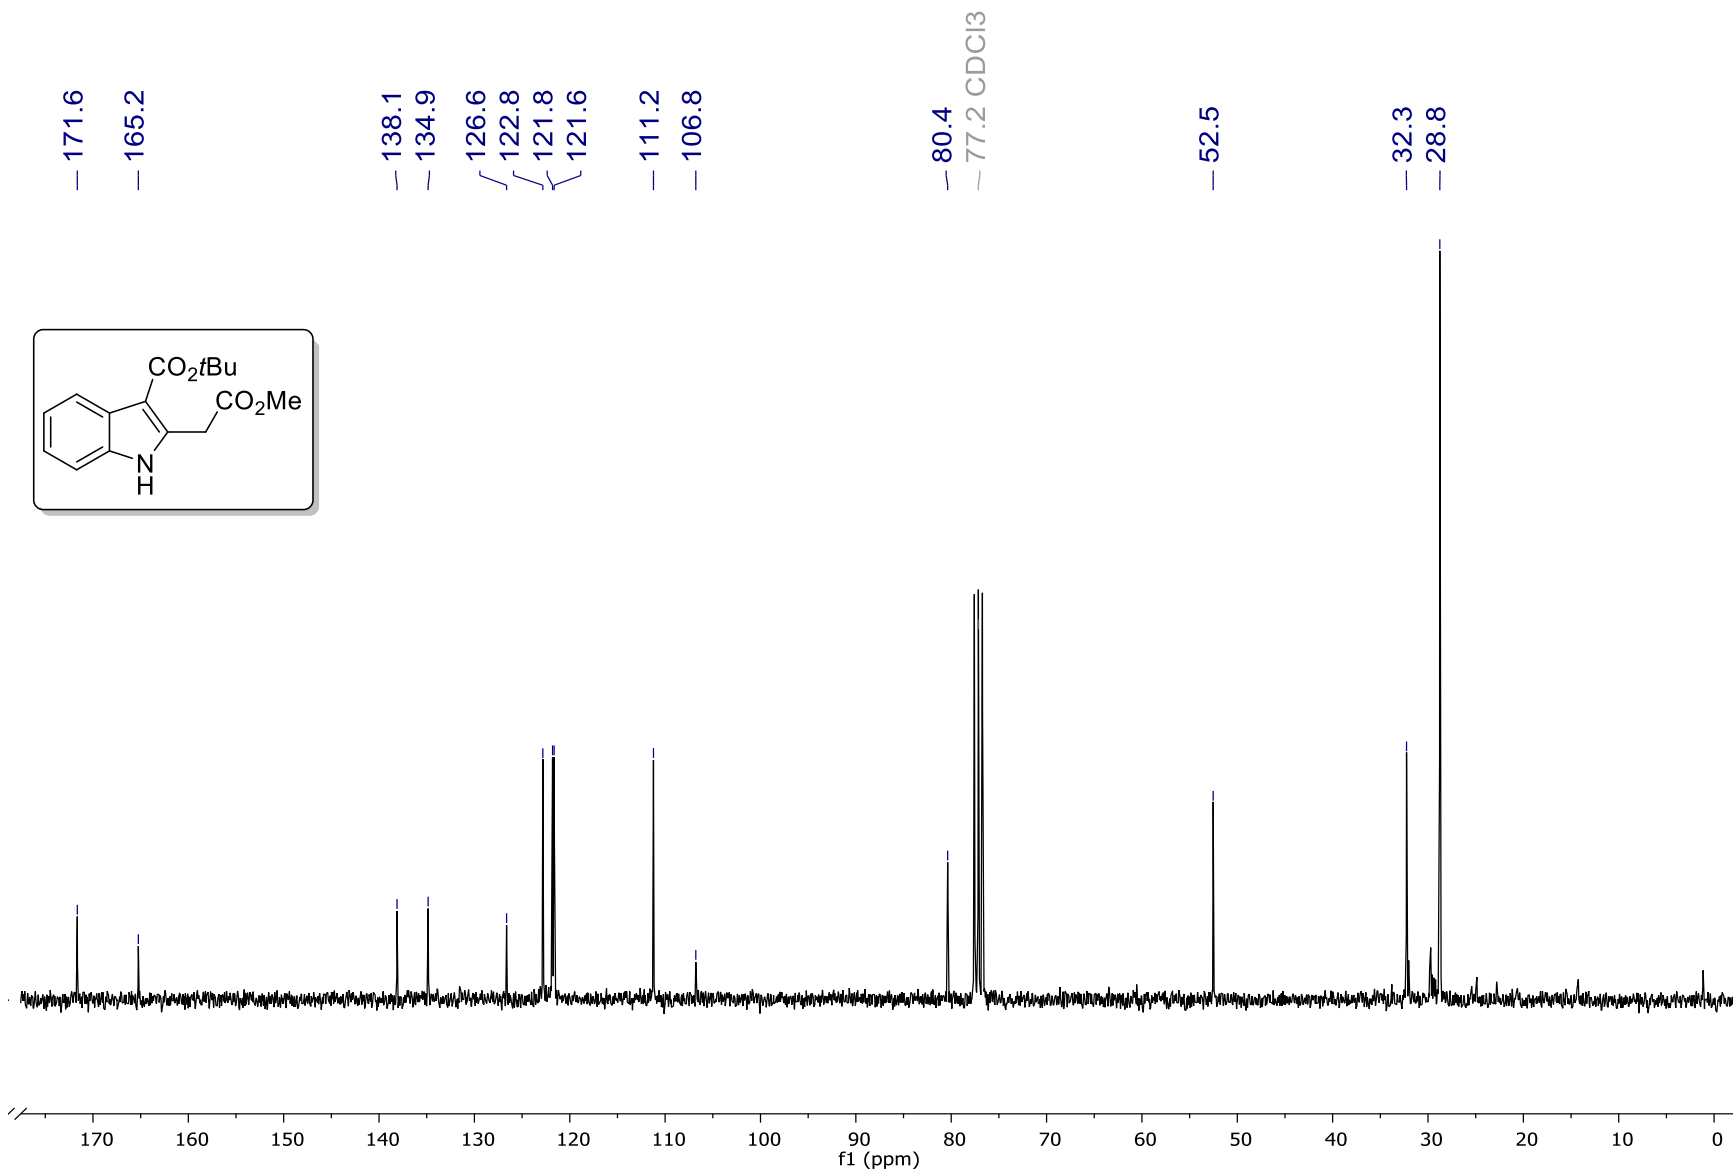



# <sup>1</sup>H and <sup>13</sup>C NMR Spectra of 14a

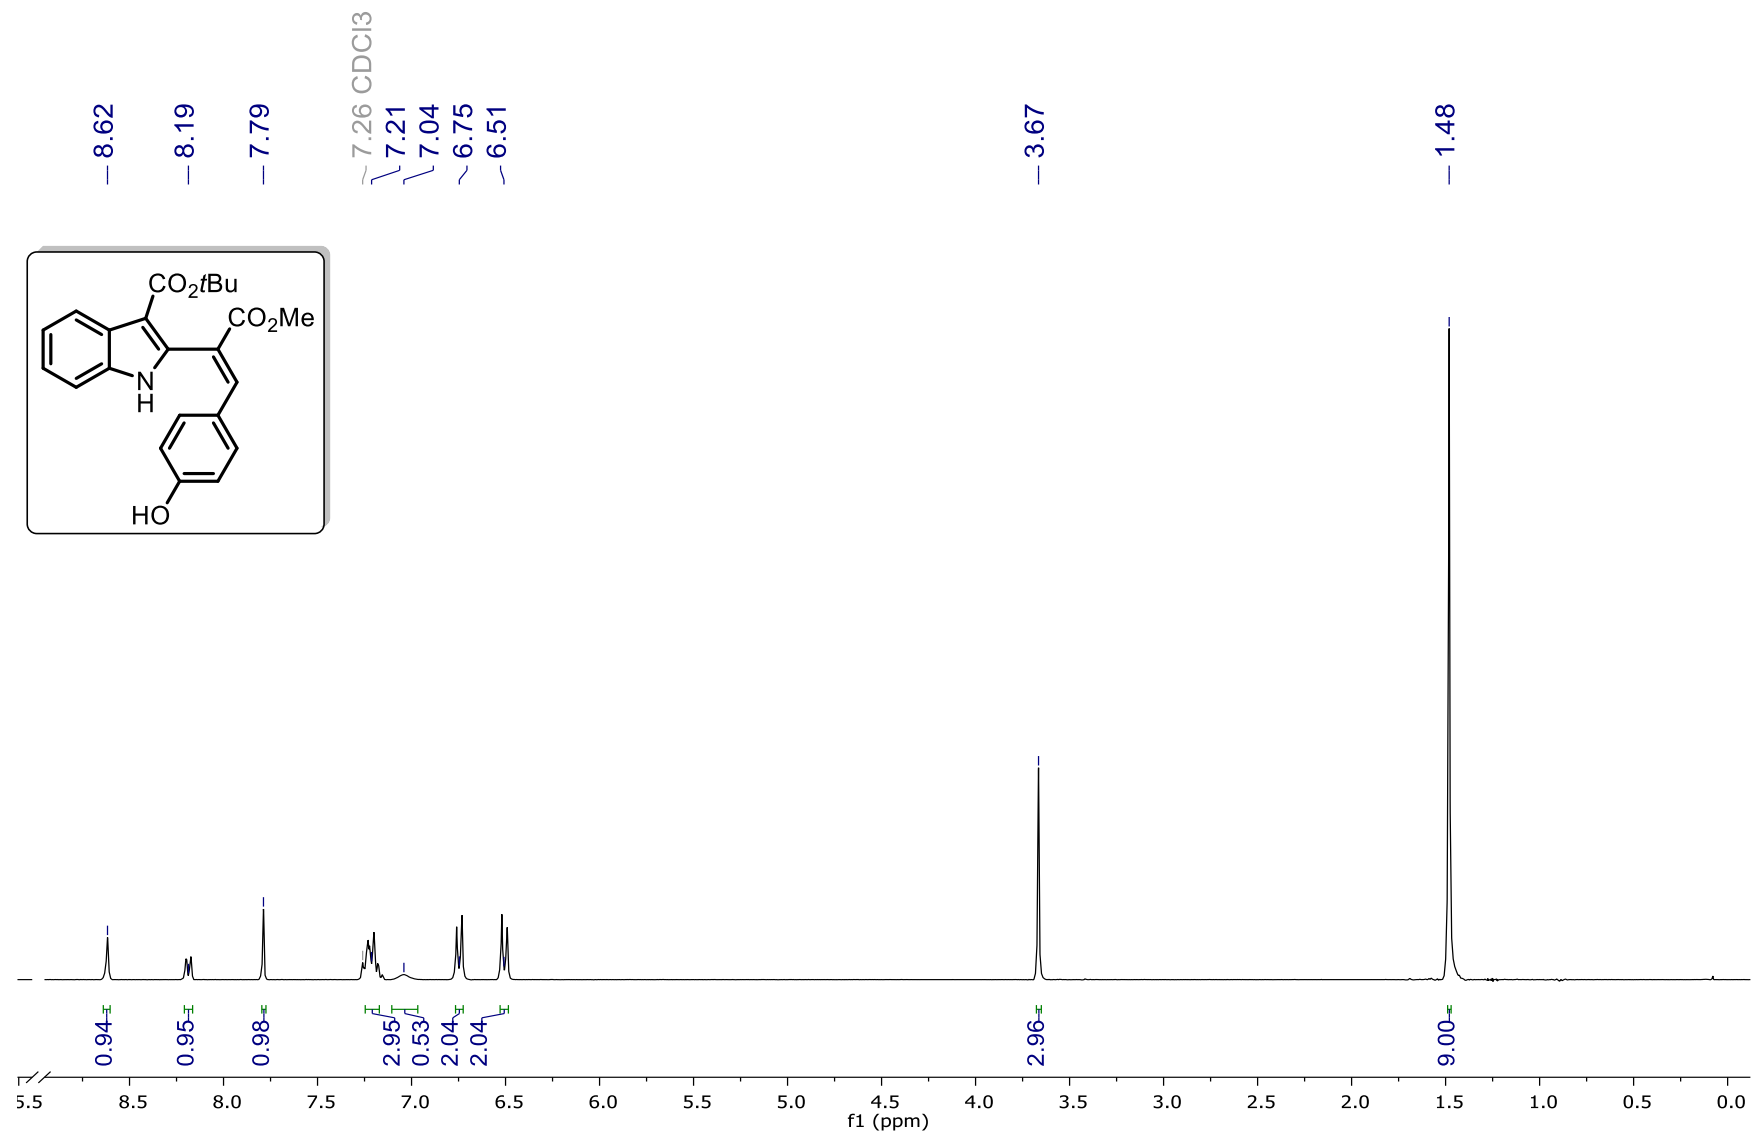

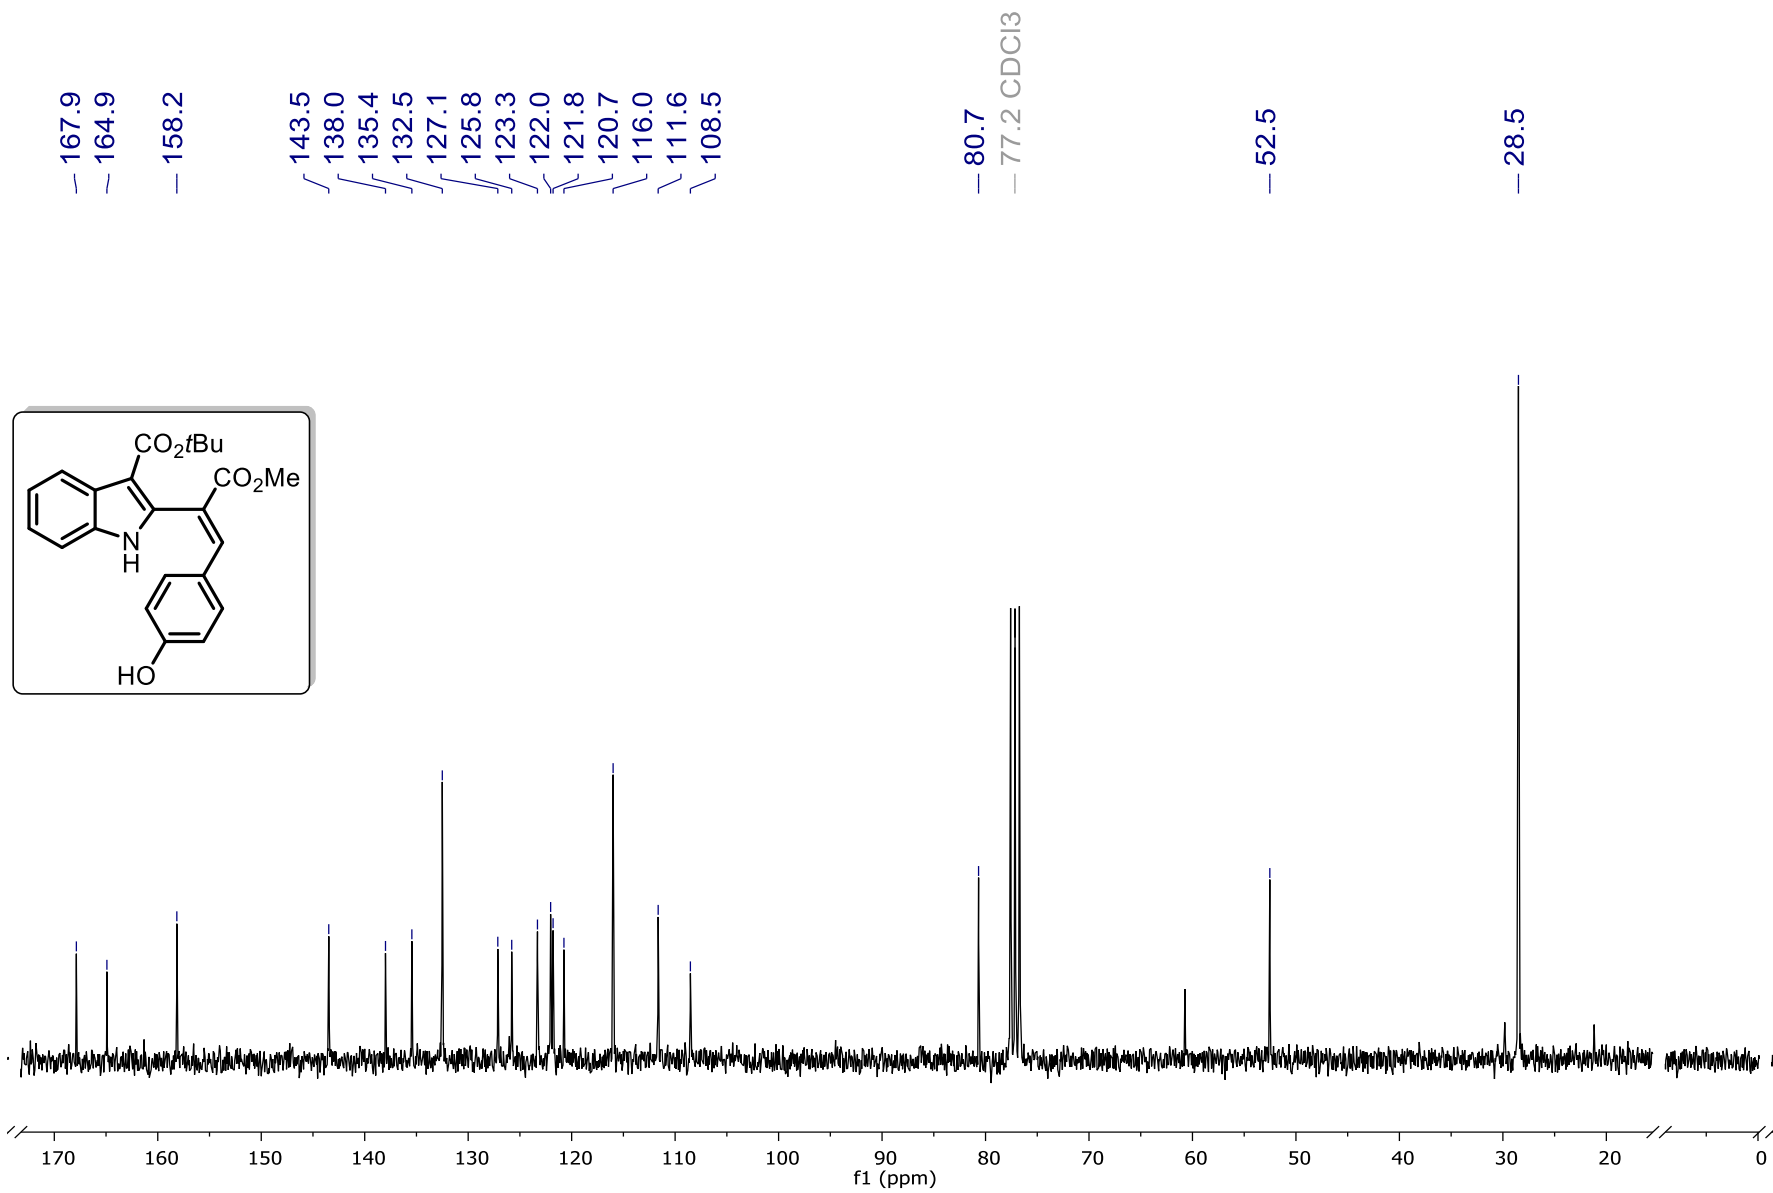

# <sup>1</sup>H and <sup>13</sup>C NMR Spectra of 14b

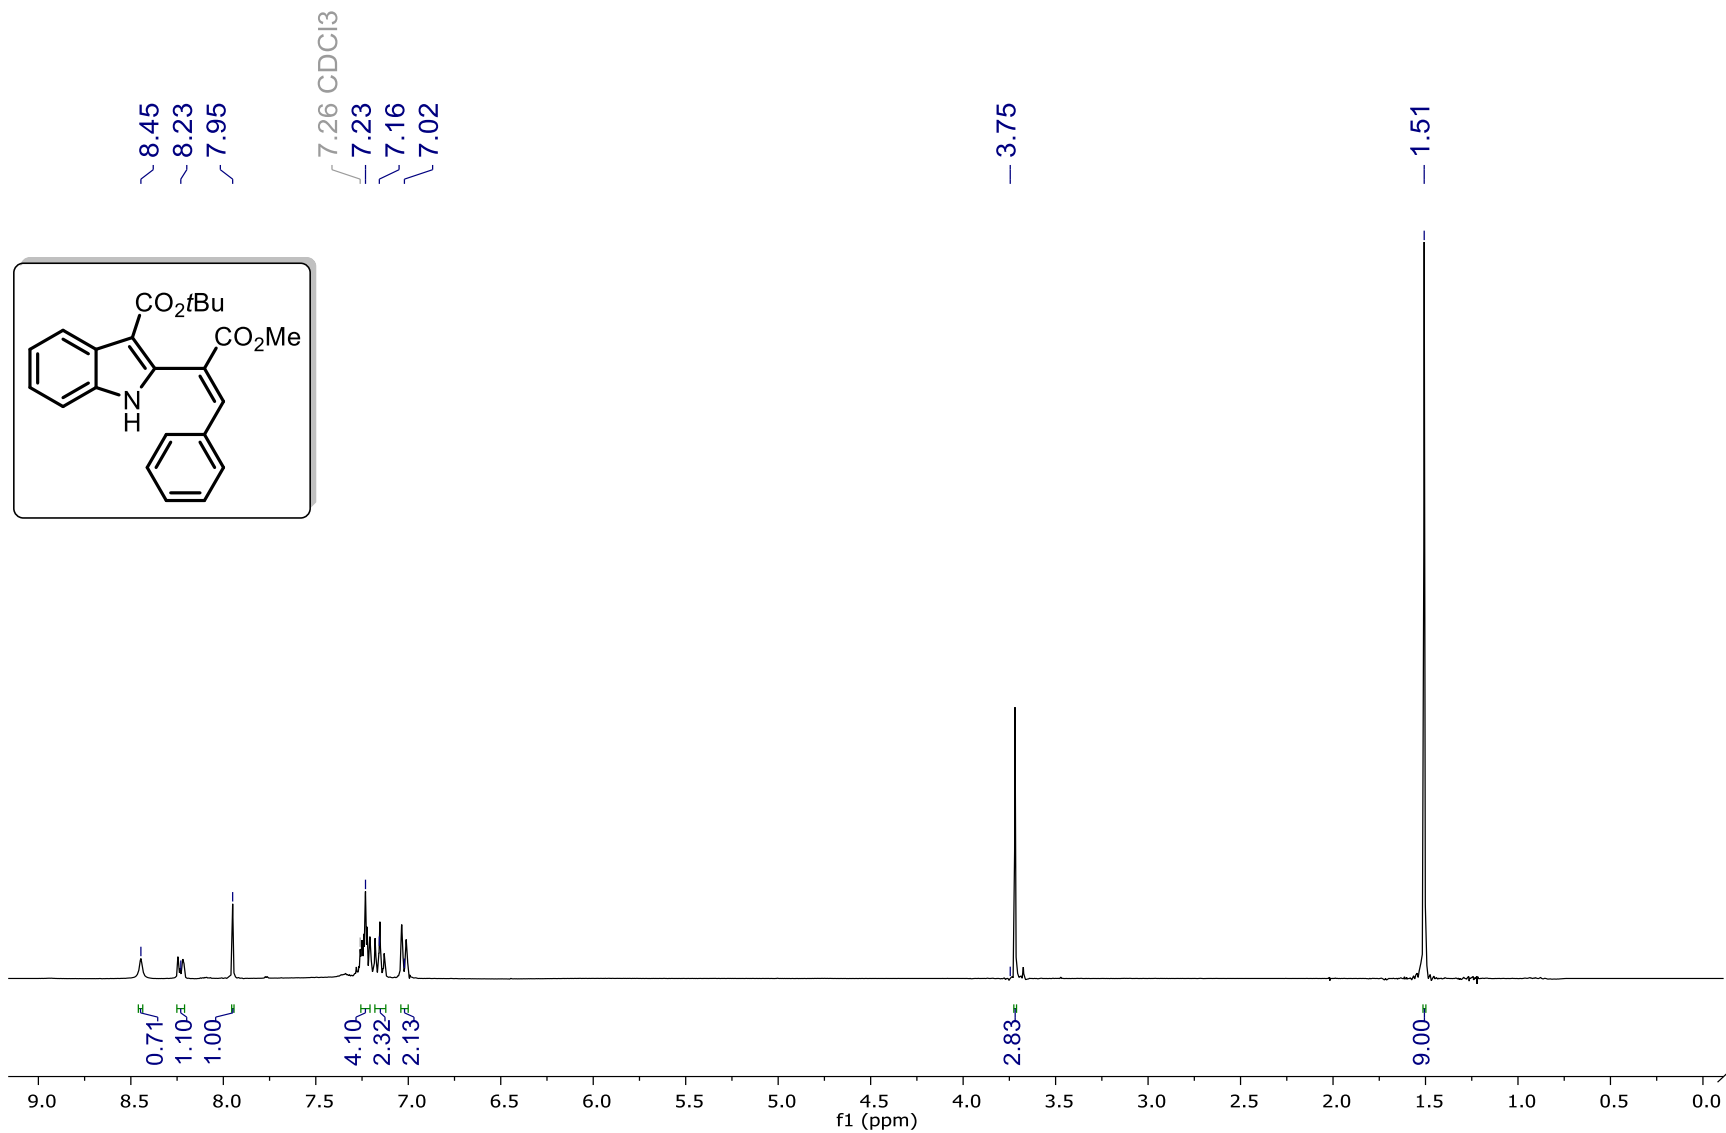

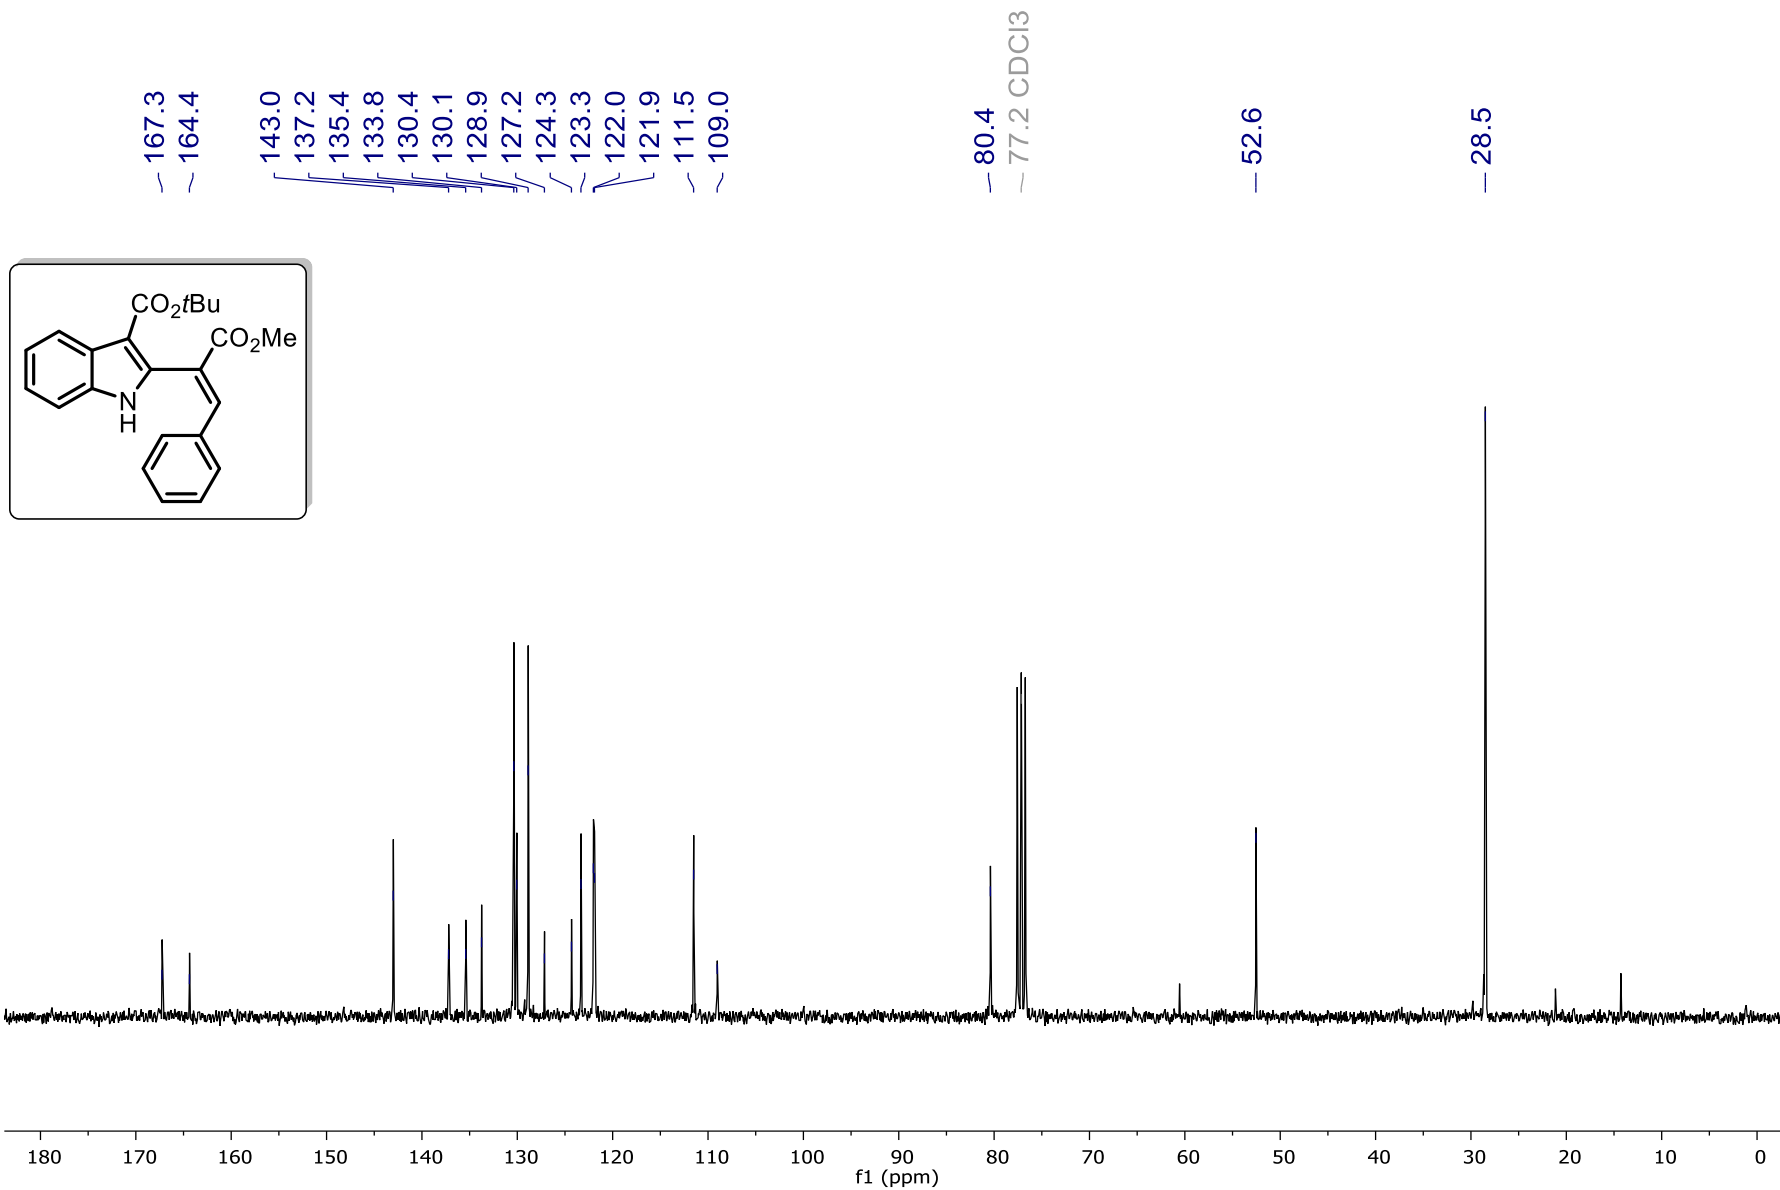

# <sup>1</sup>H and <sup>13</sup>C NMR Spectra of 14c

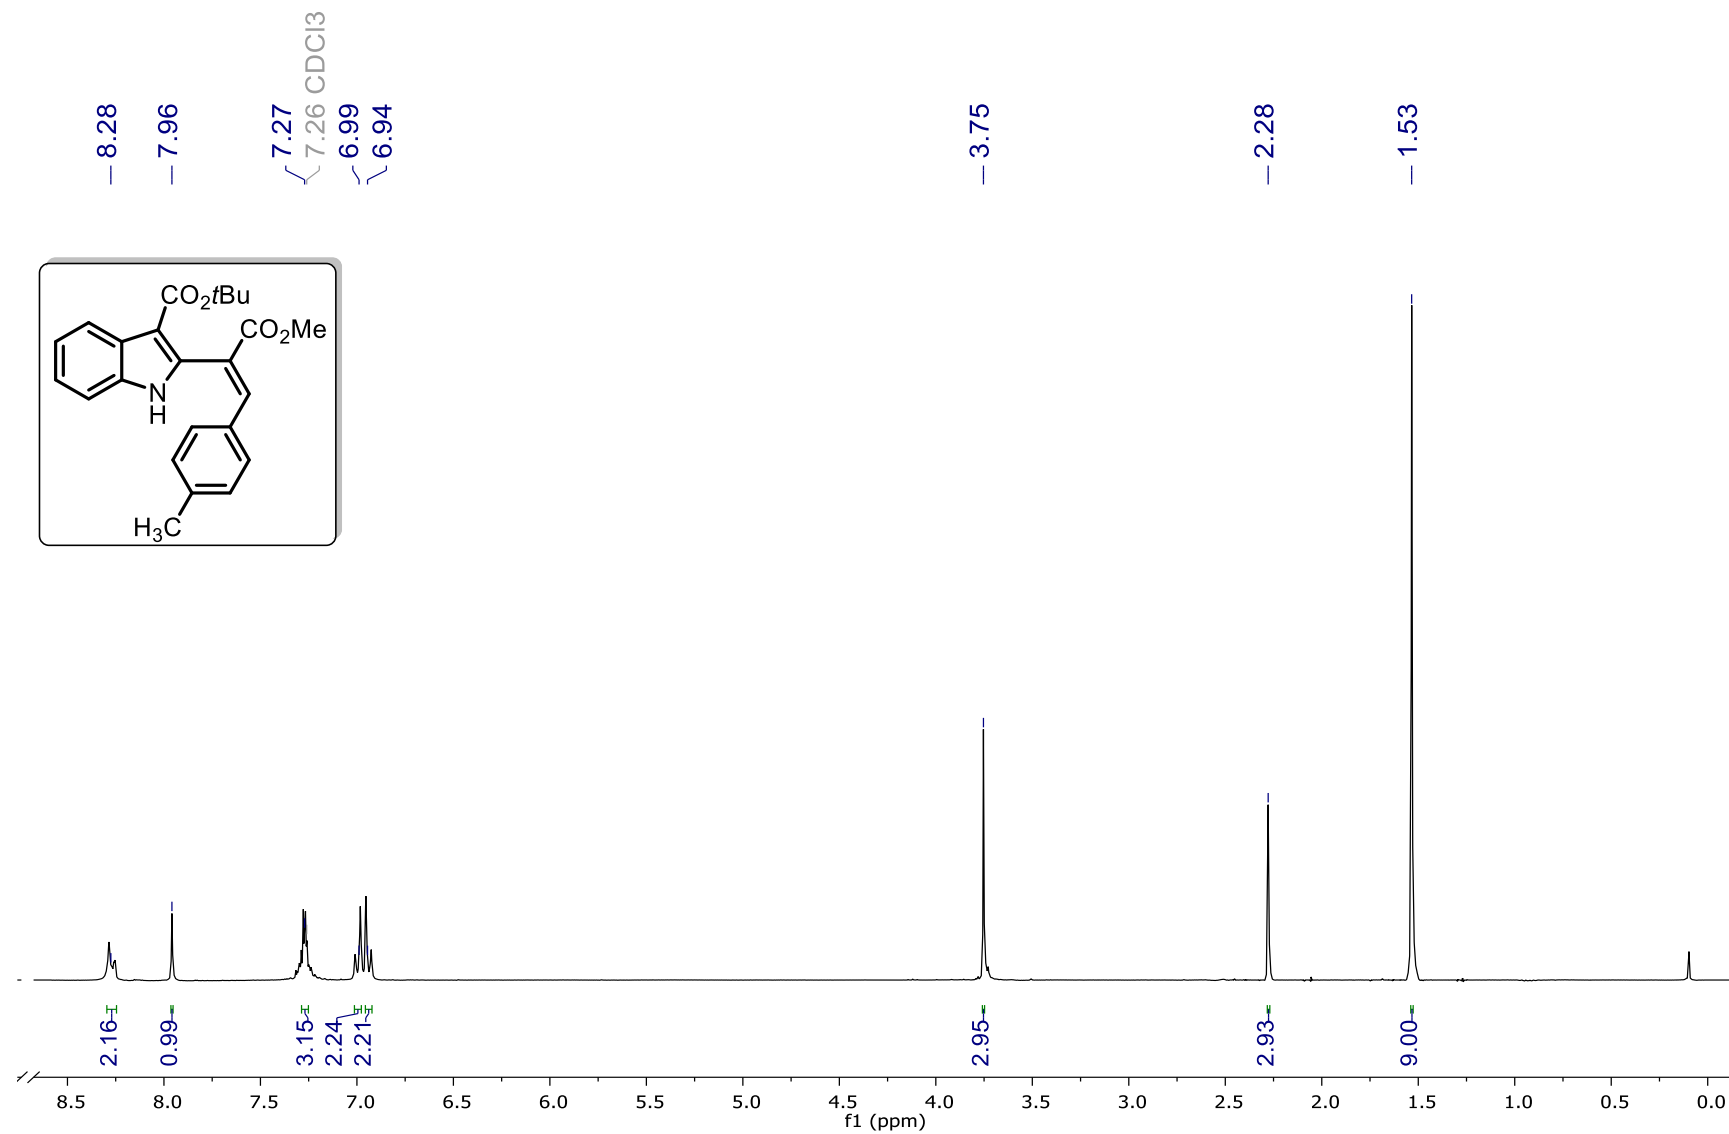

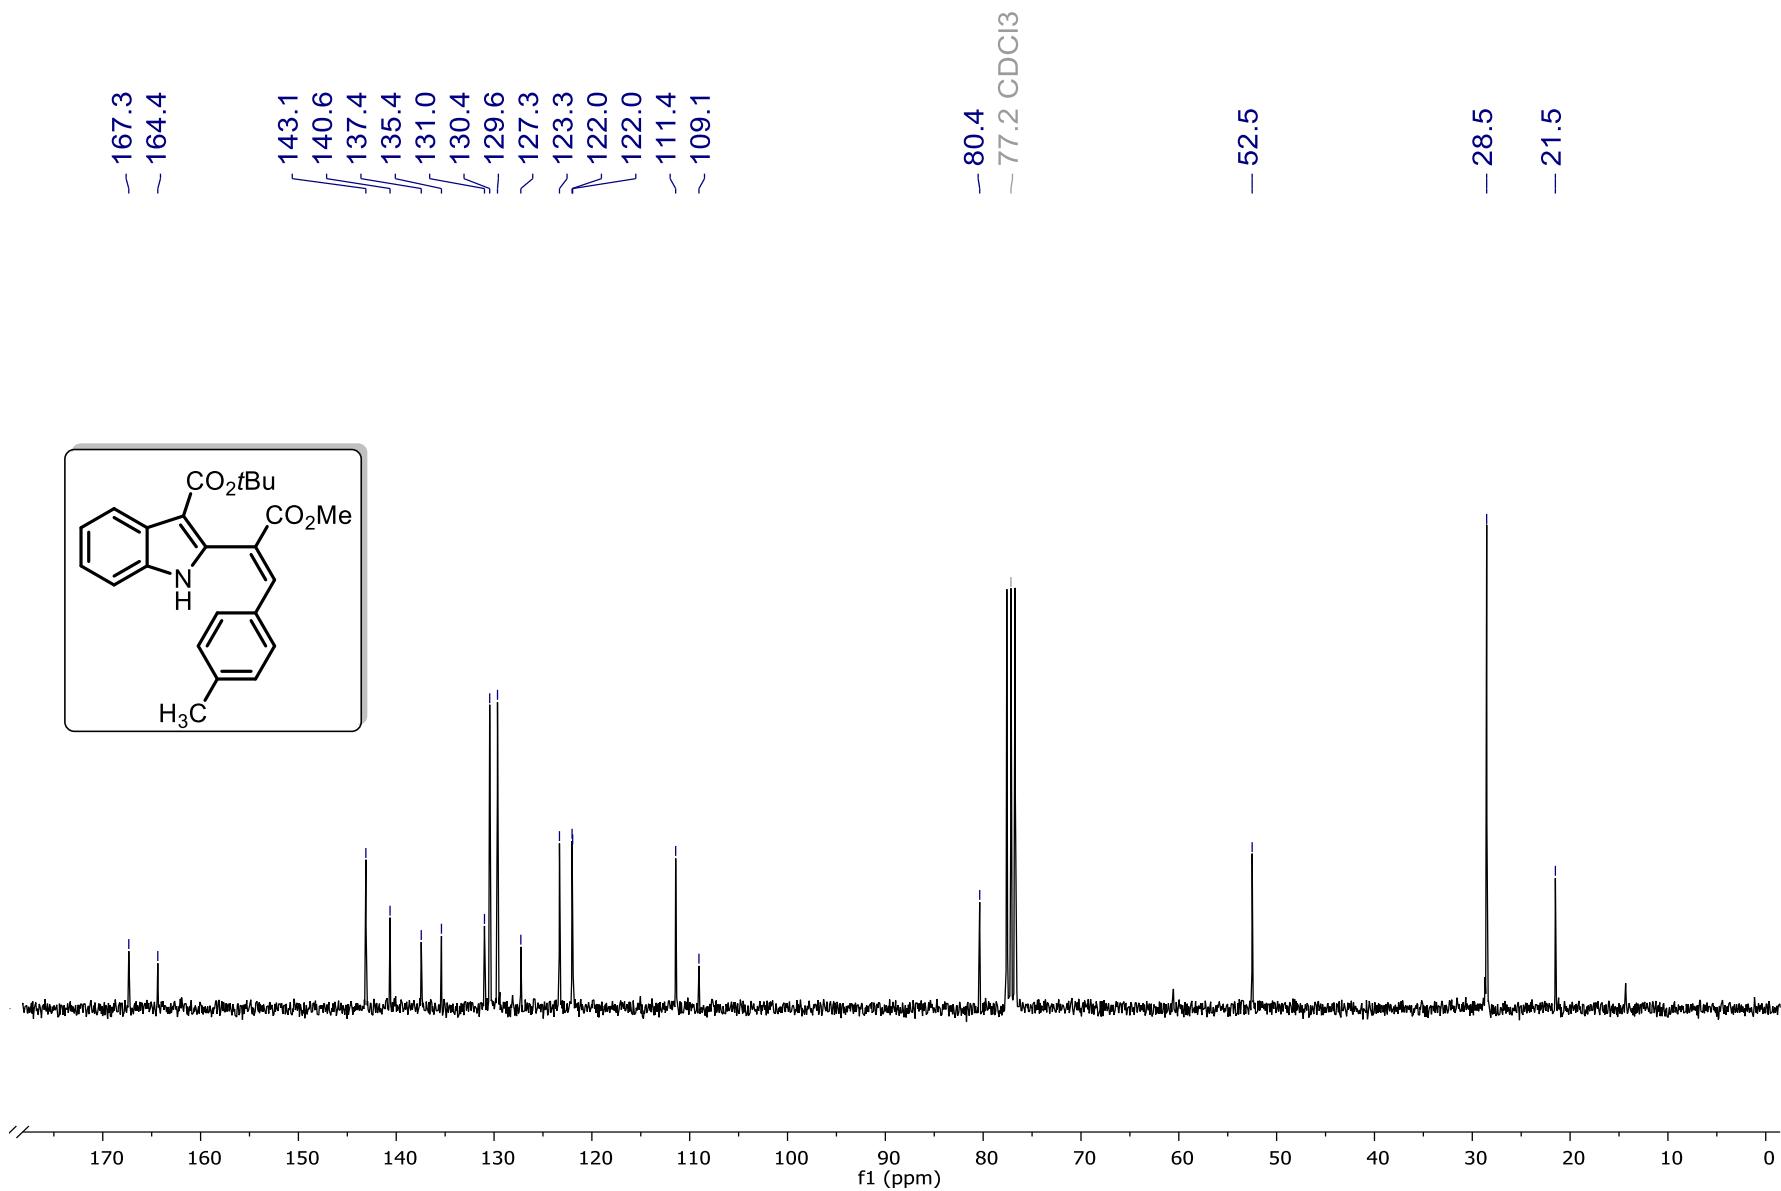

# <sup>1</sup>H and <sup>13</sup>C NMR Spectra of 14d

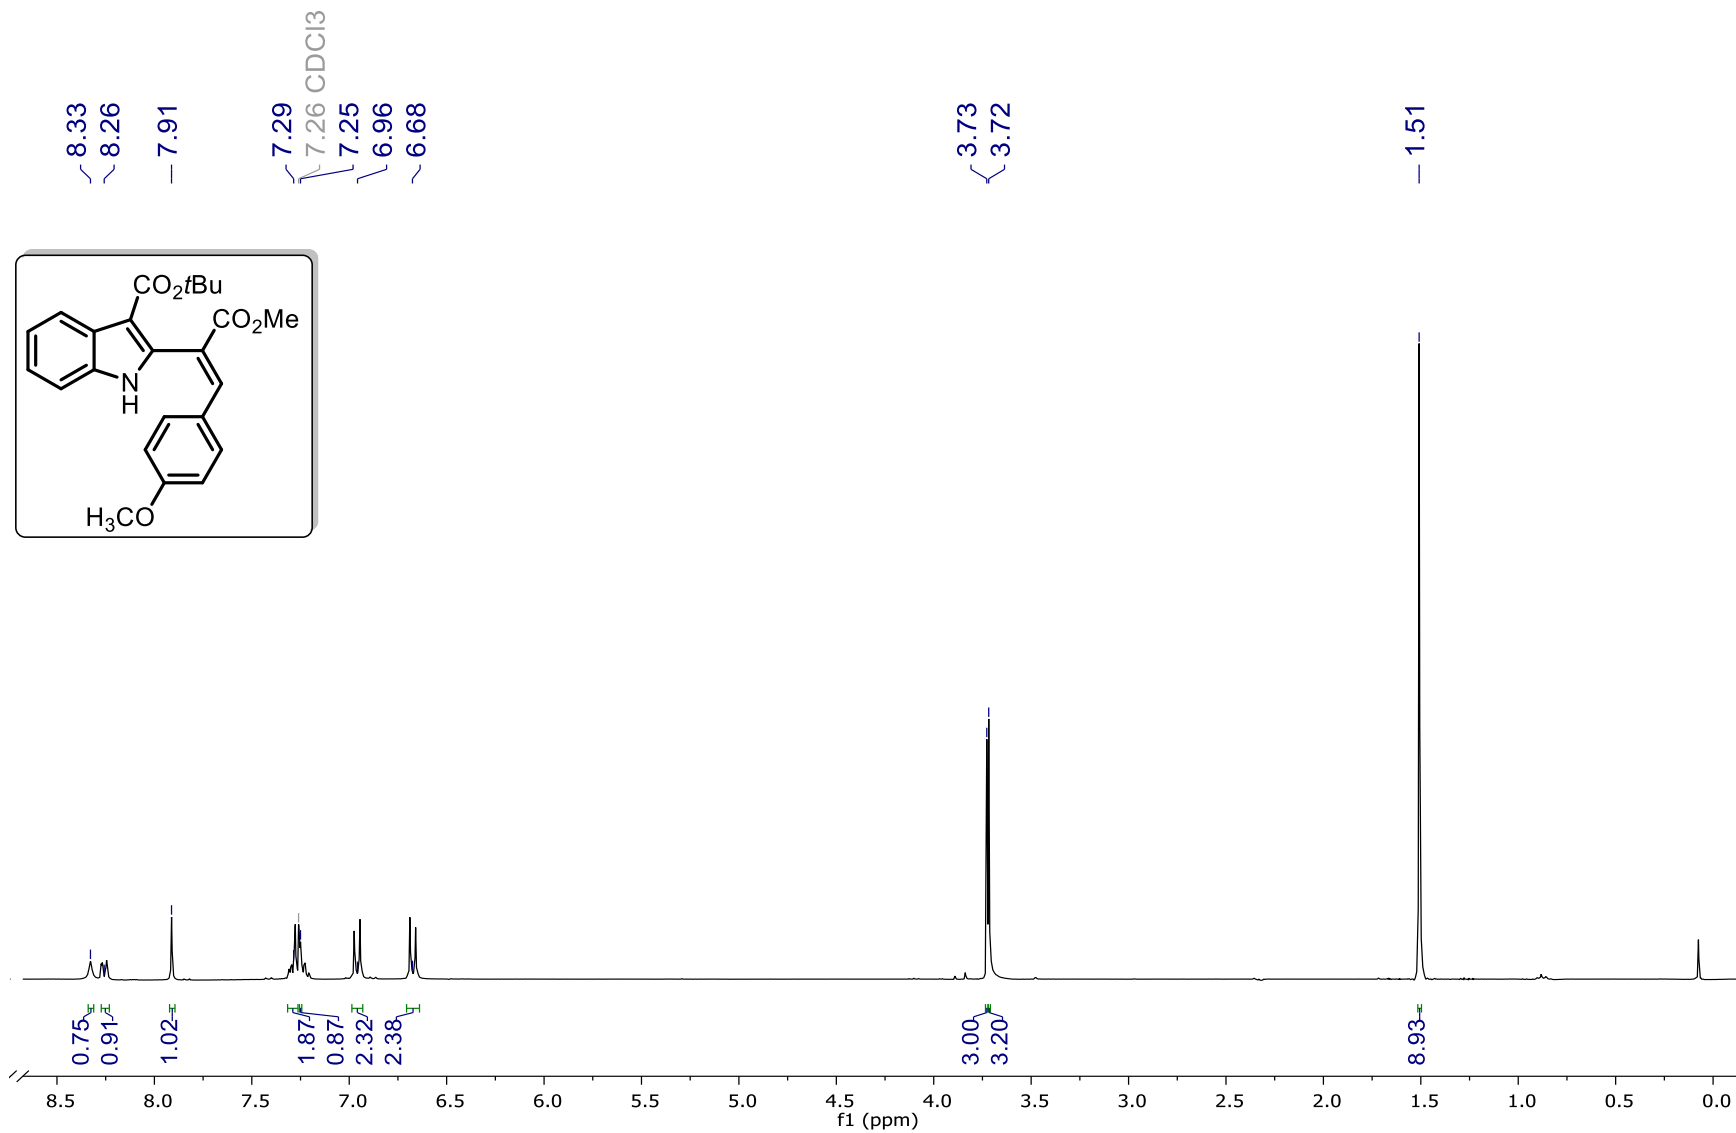

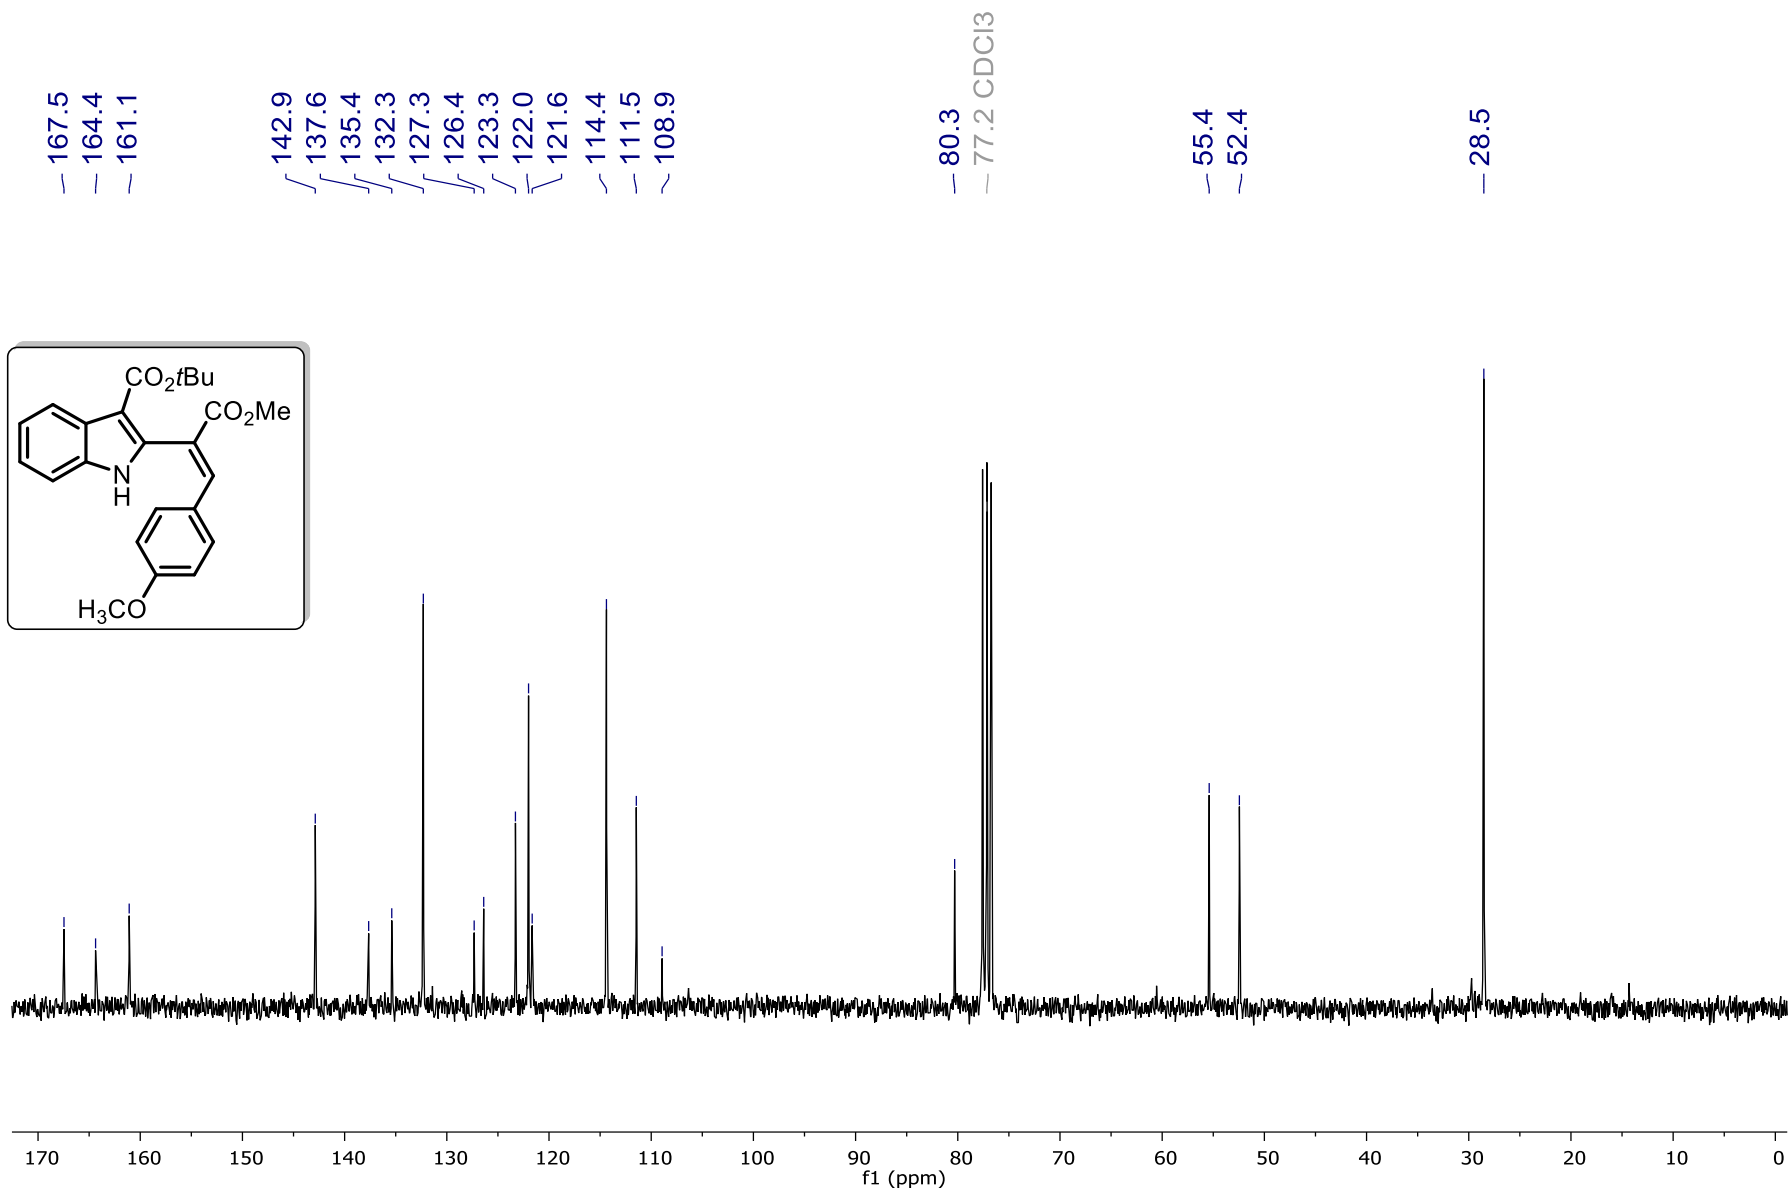



# <sup>1</sup>H and <sup>13</sup>C NMR Spectra of 14e

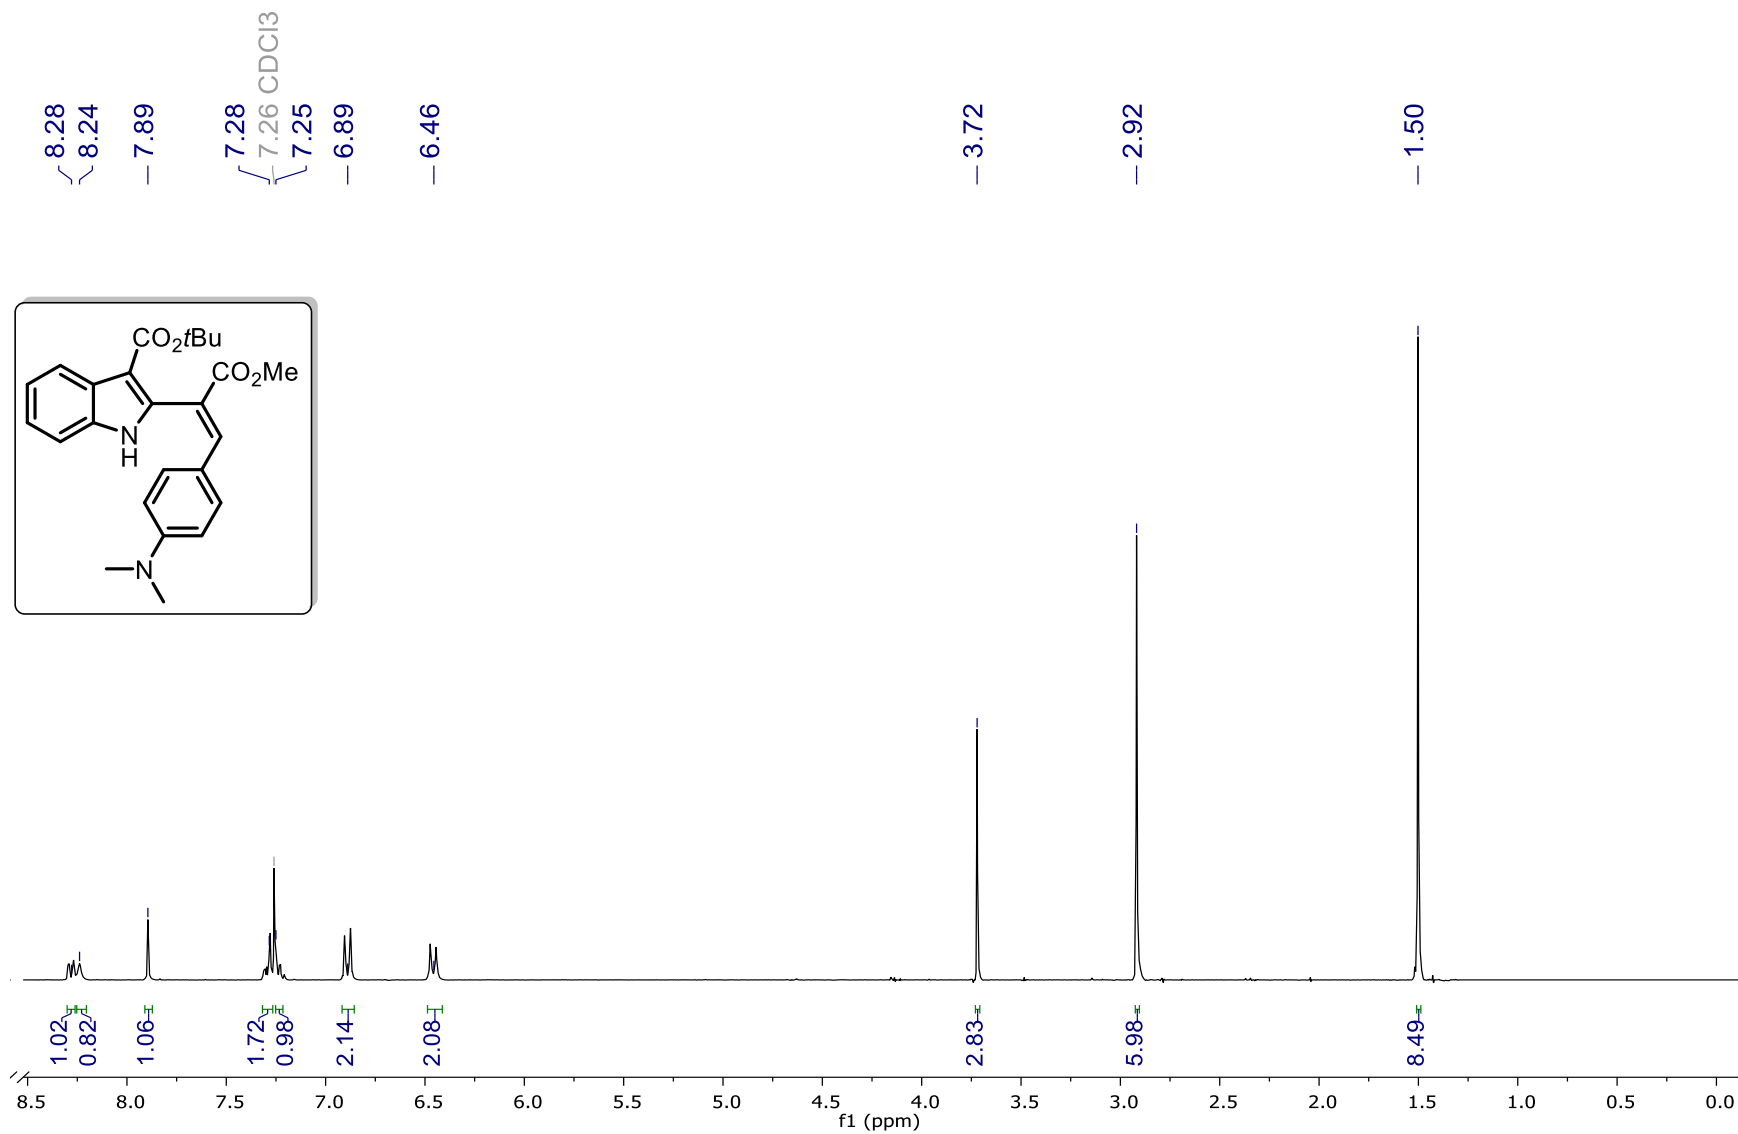

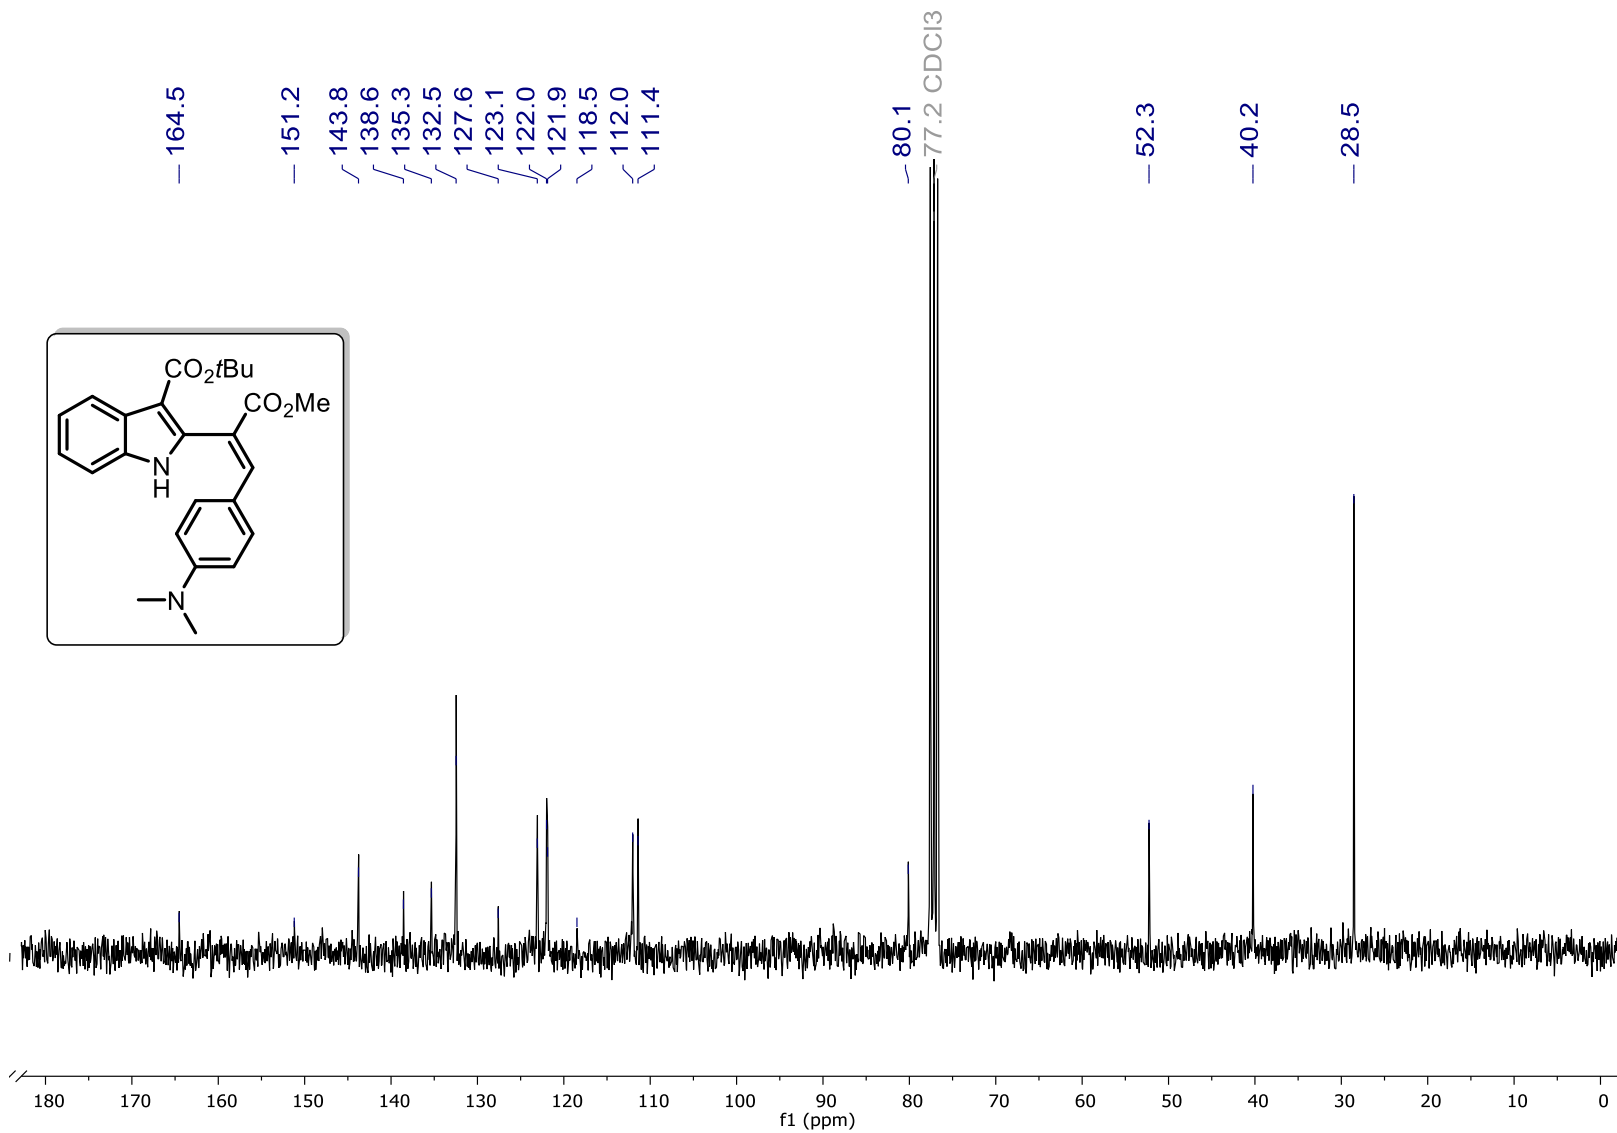

# <sup>1</sup>H and <sup>13</sup>C NMR Spectra of 14f

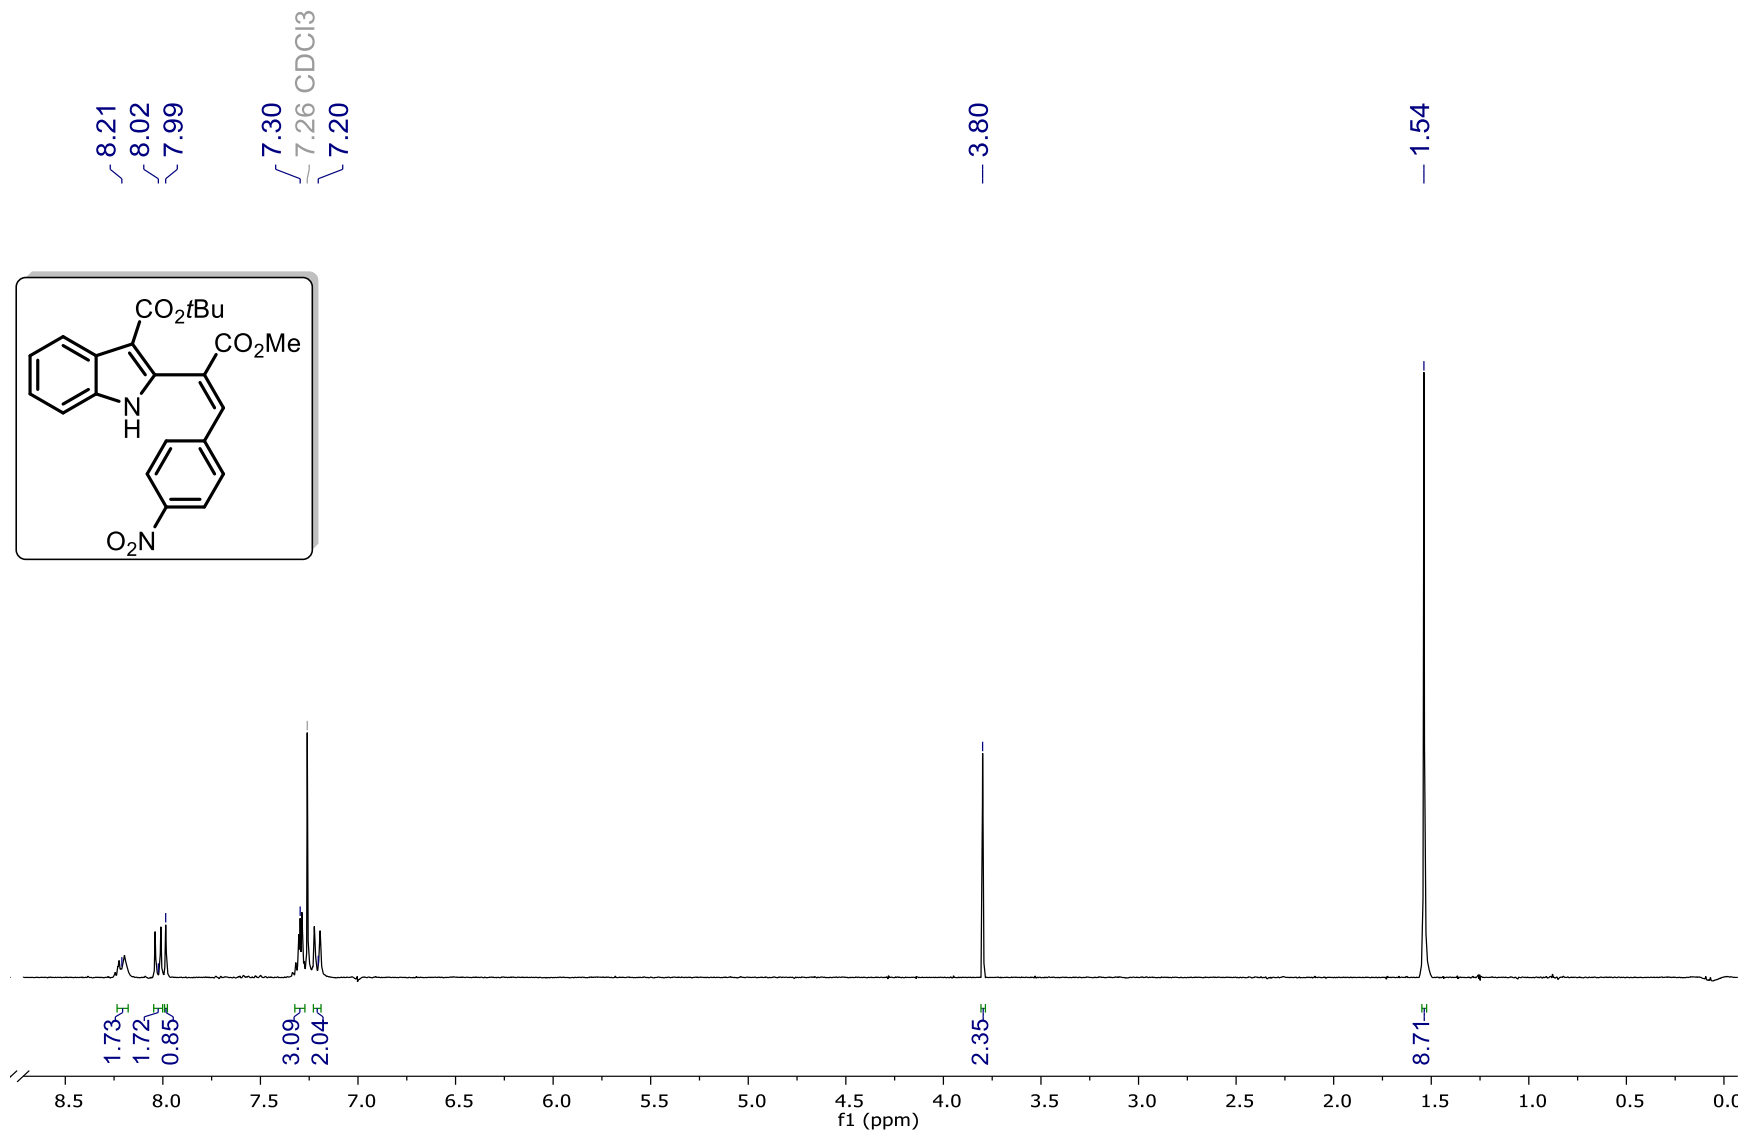

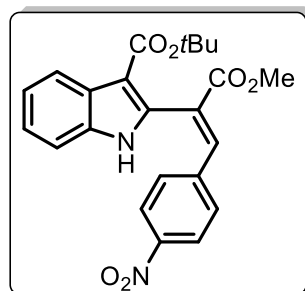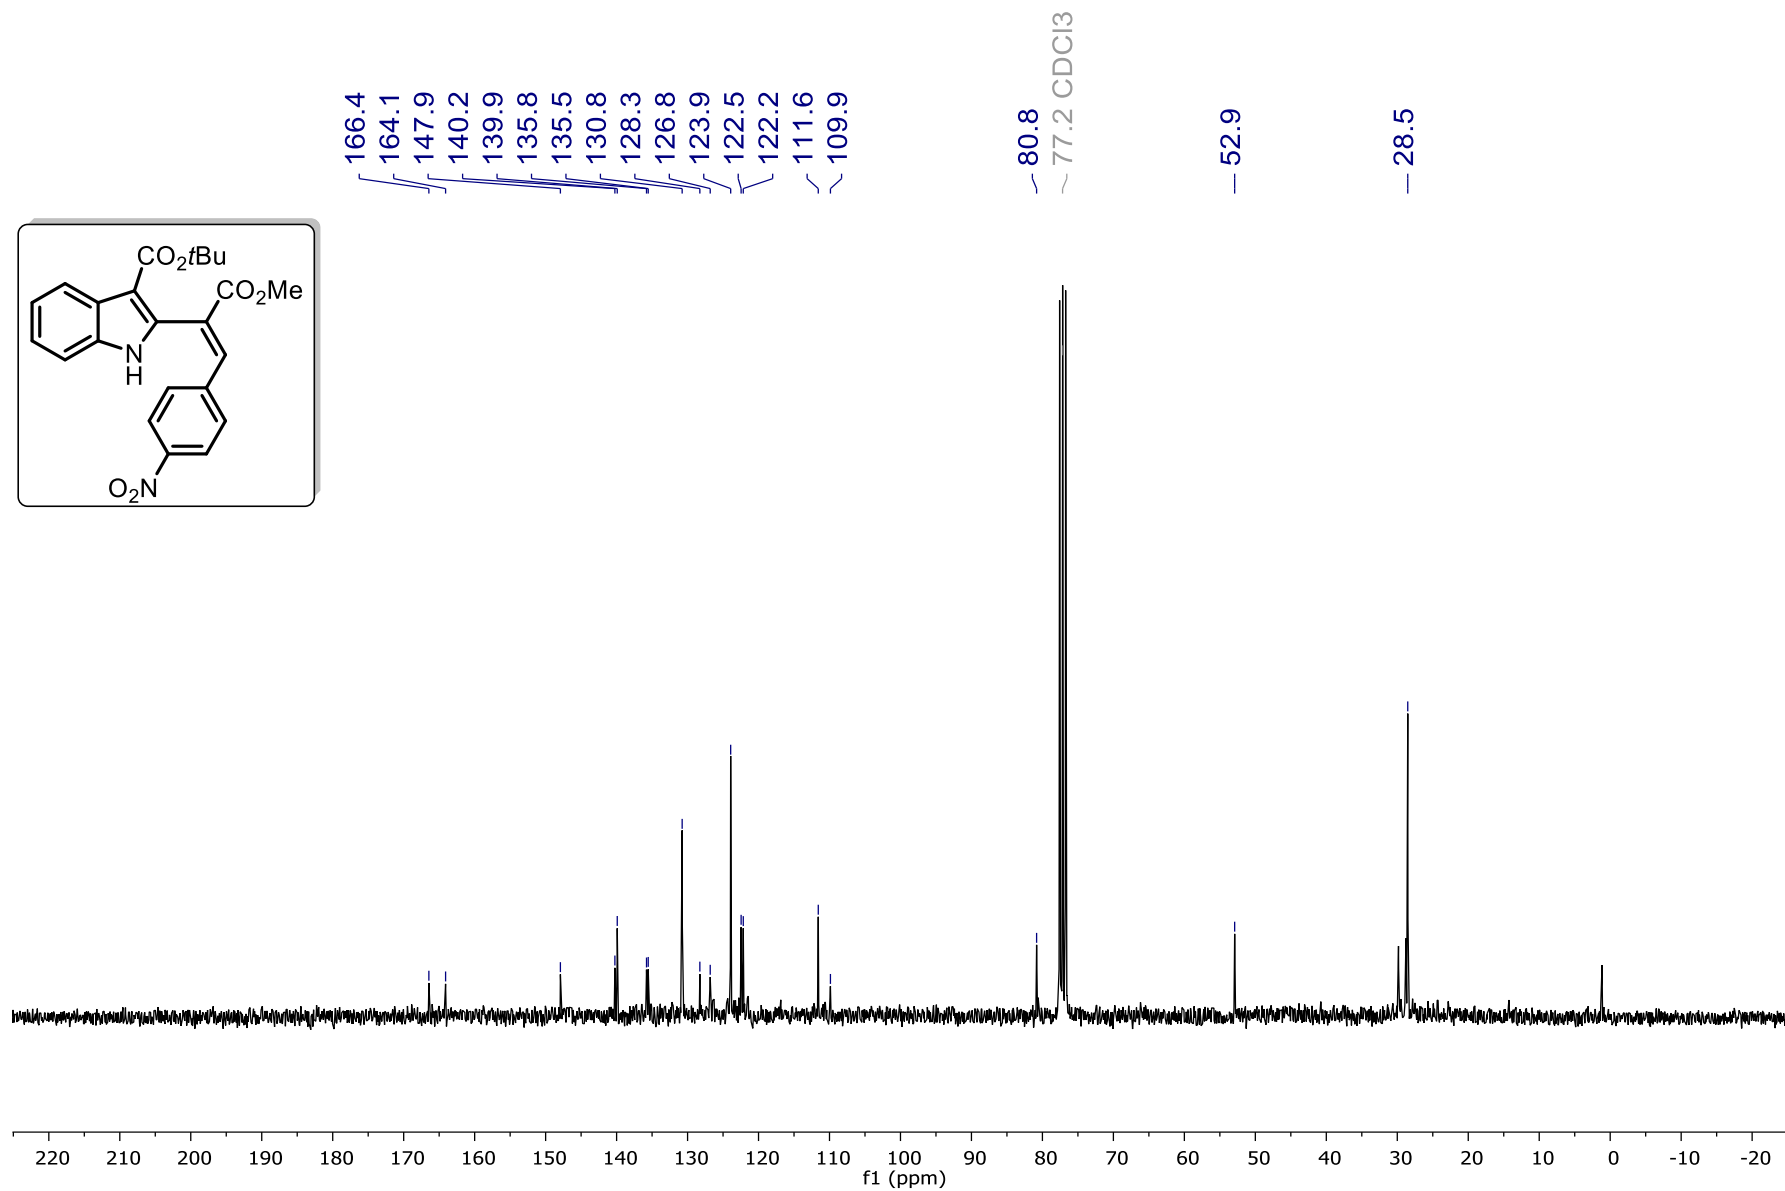

# <sup>1</sup>H and <sup>13</sup>C NMR Spectra of 14g

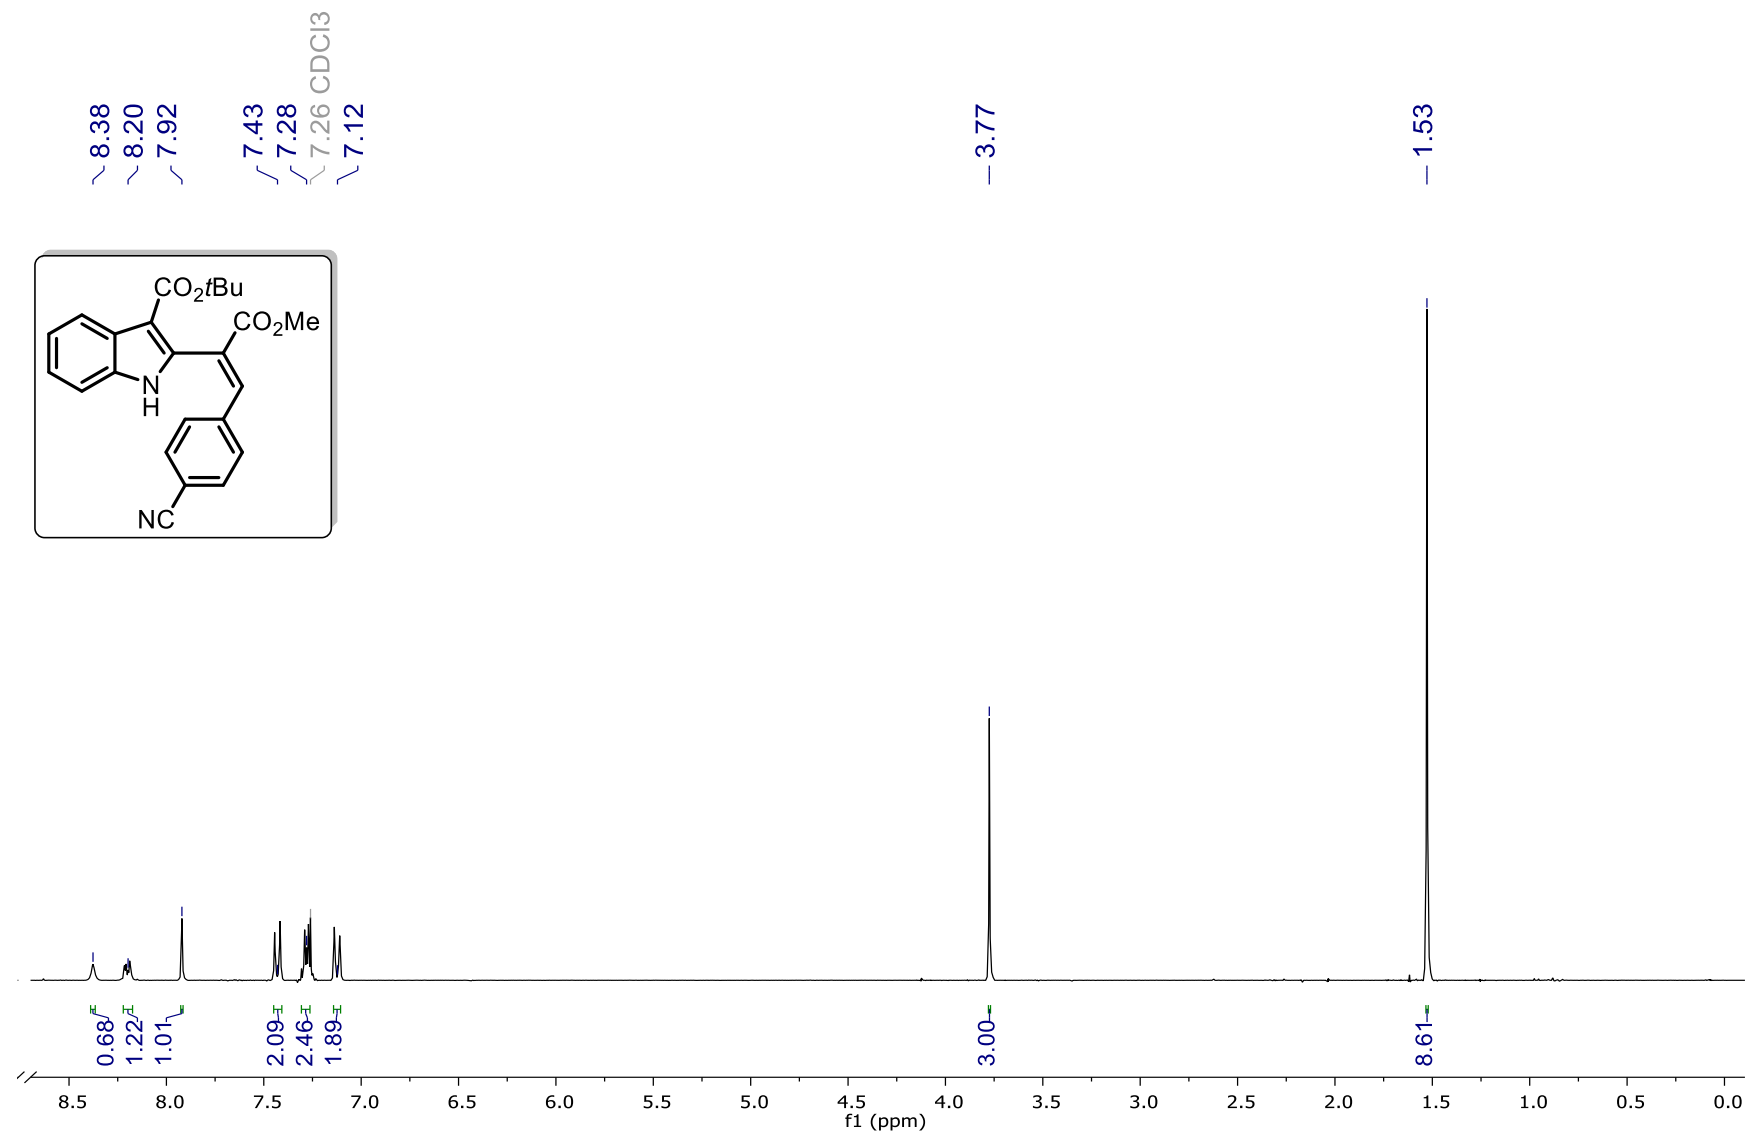

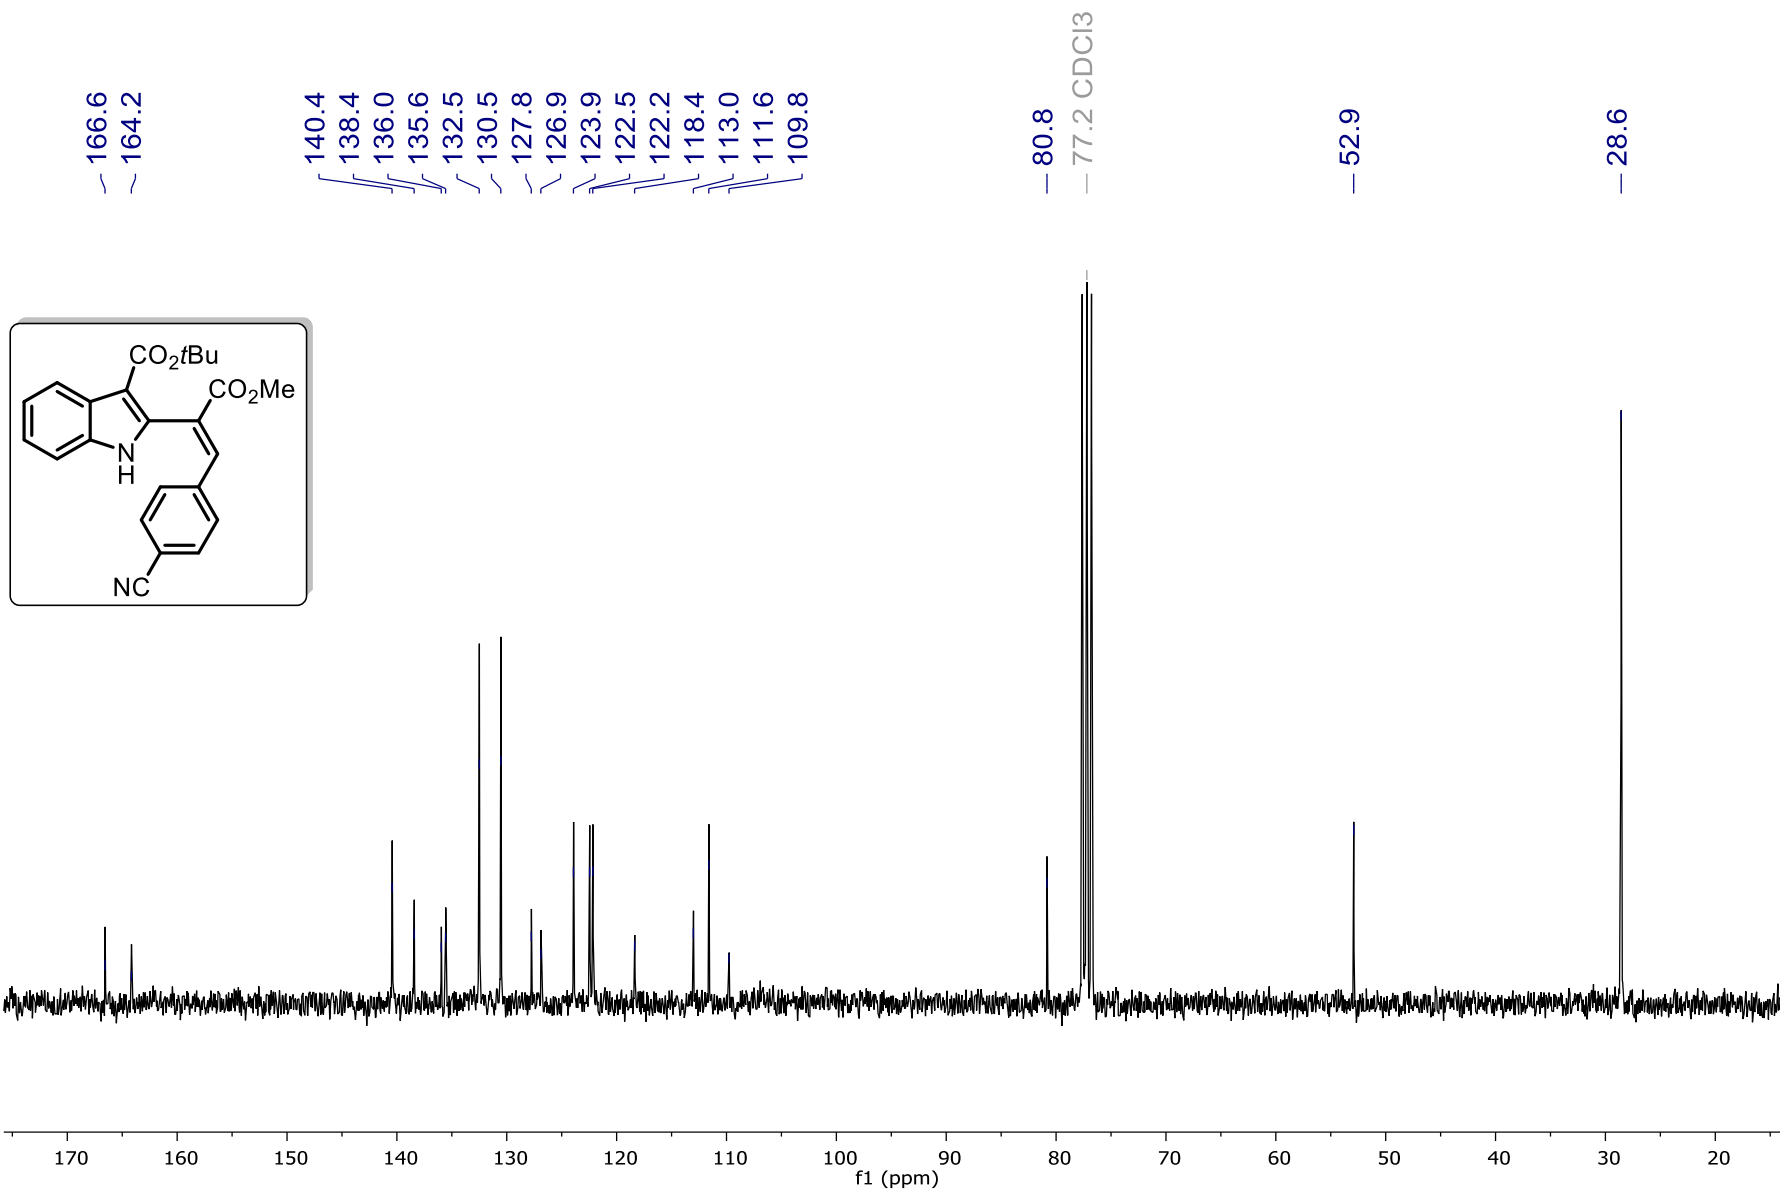

# <sup>1</sup>H and <sup>13</sup>C NMR Spectra of 14h

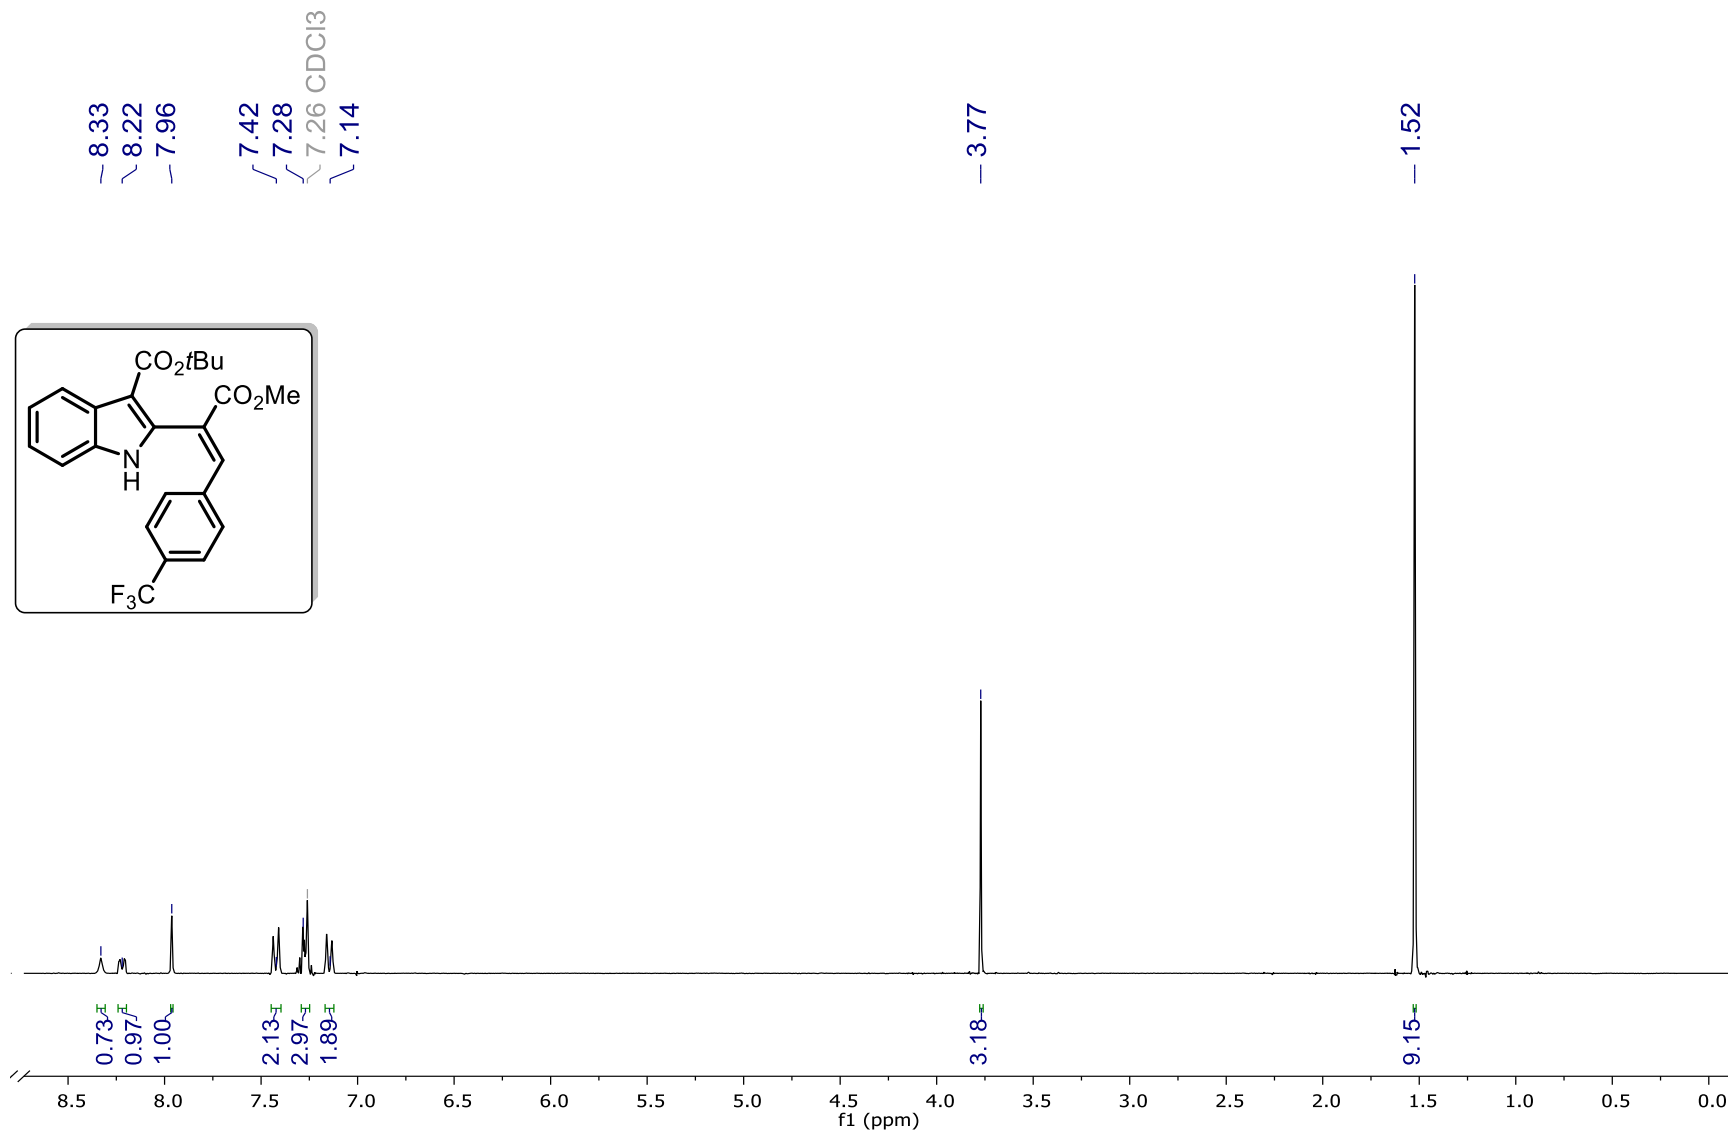

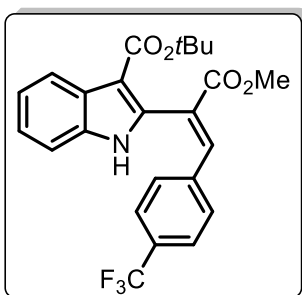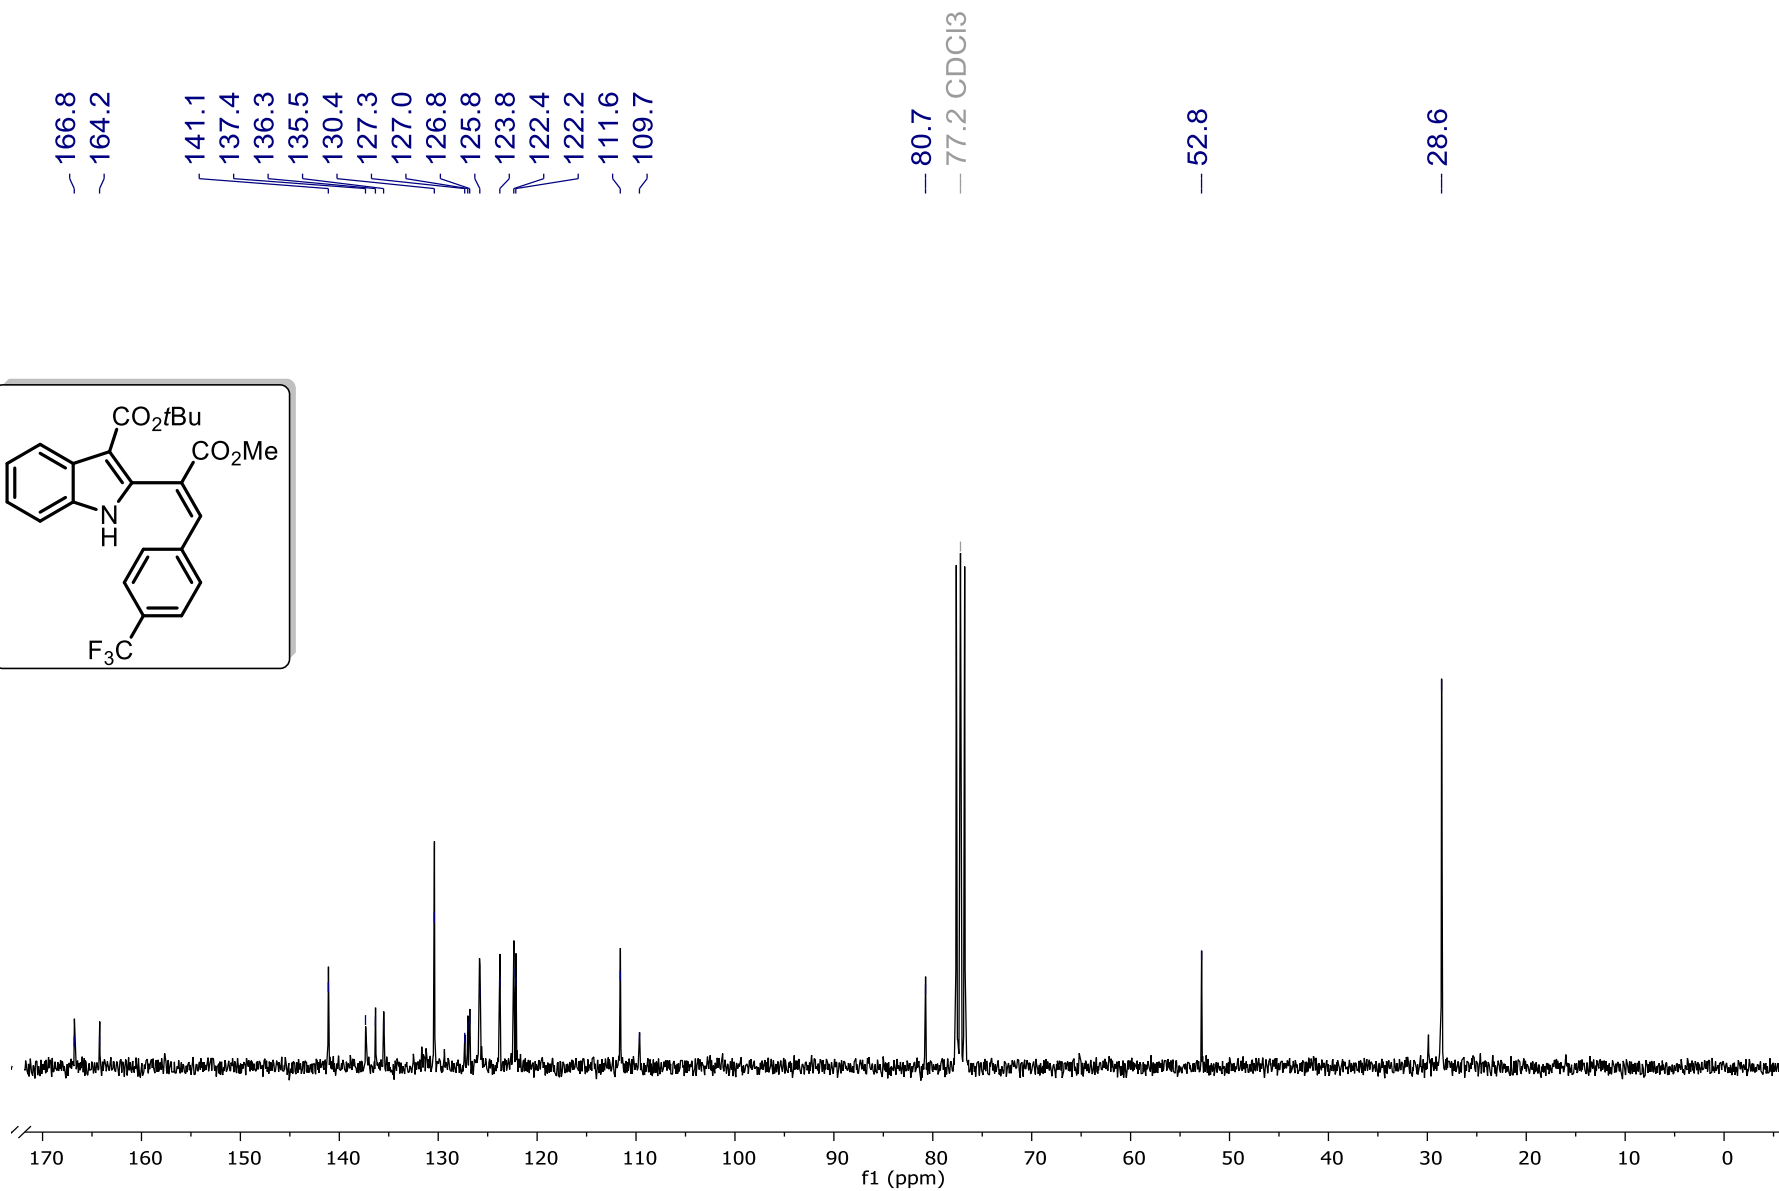



# <sup>1</sup>H and <sup>13</sup>C NMR Spectra of 14i

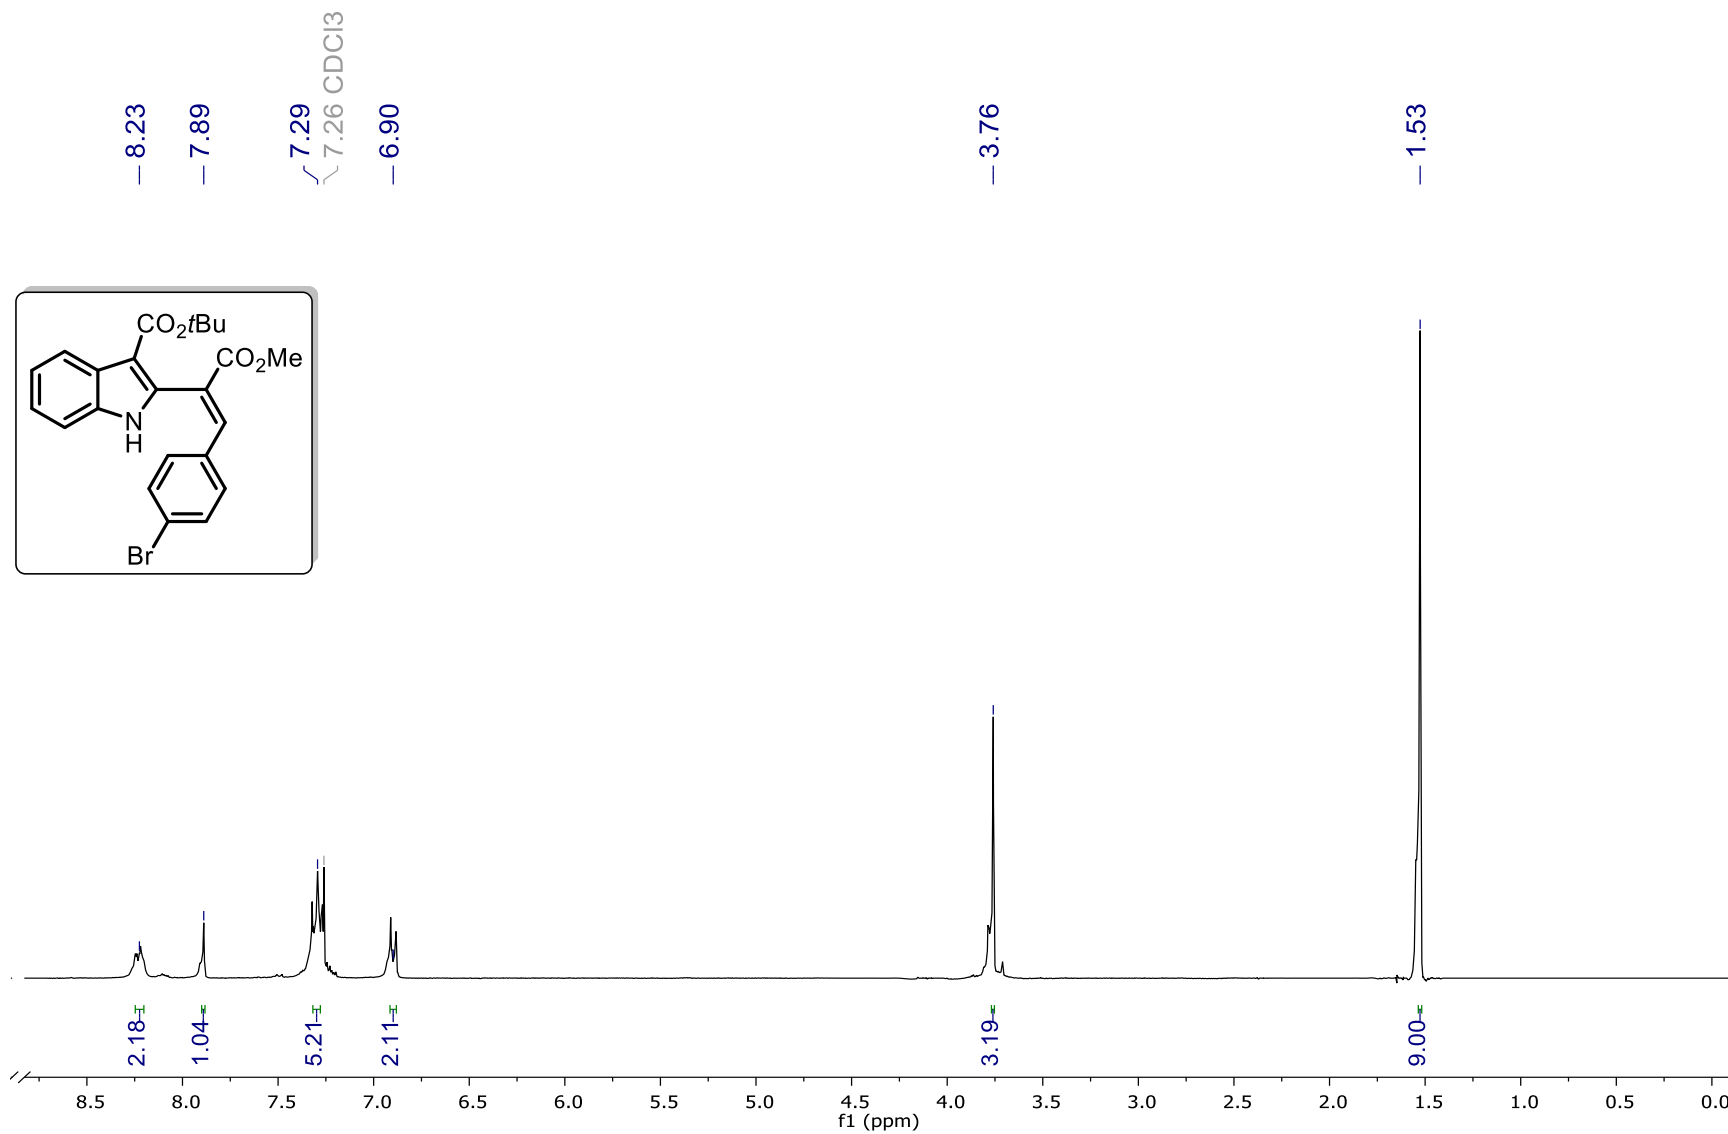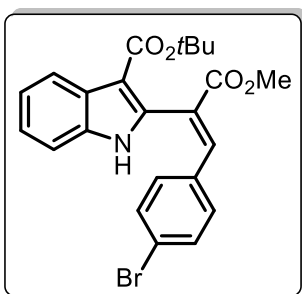

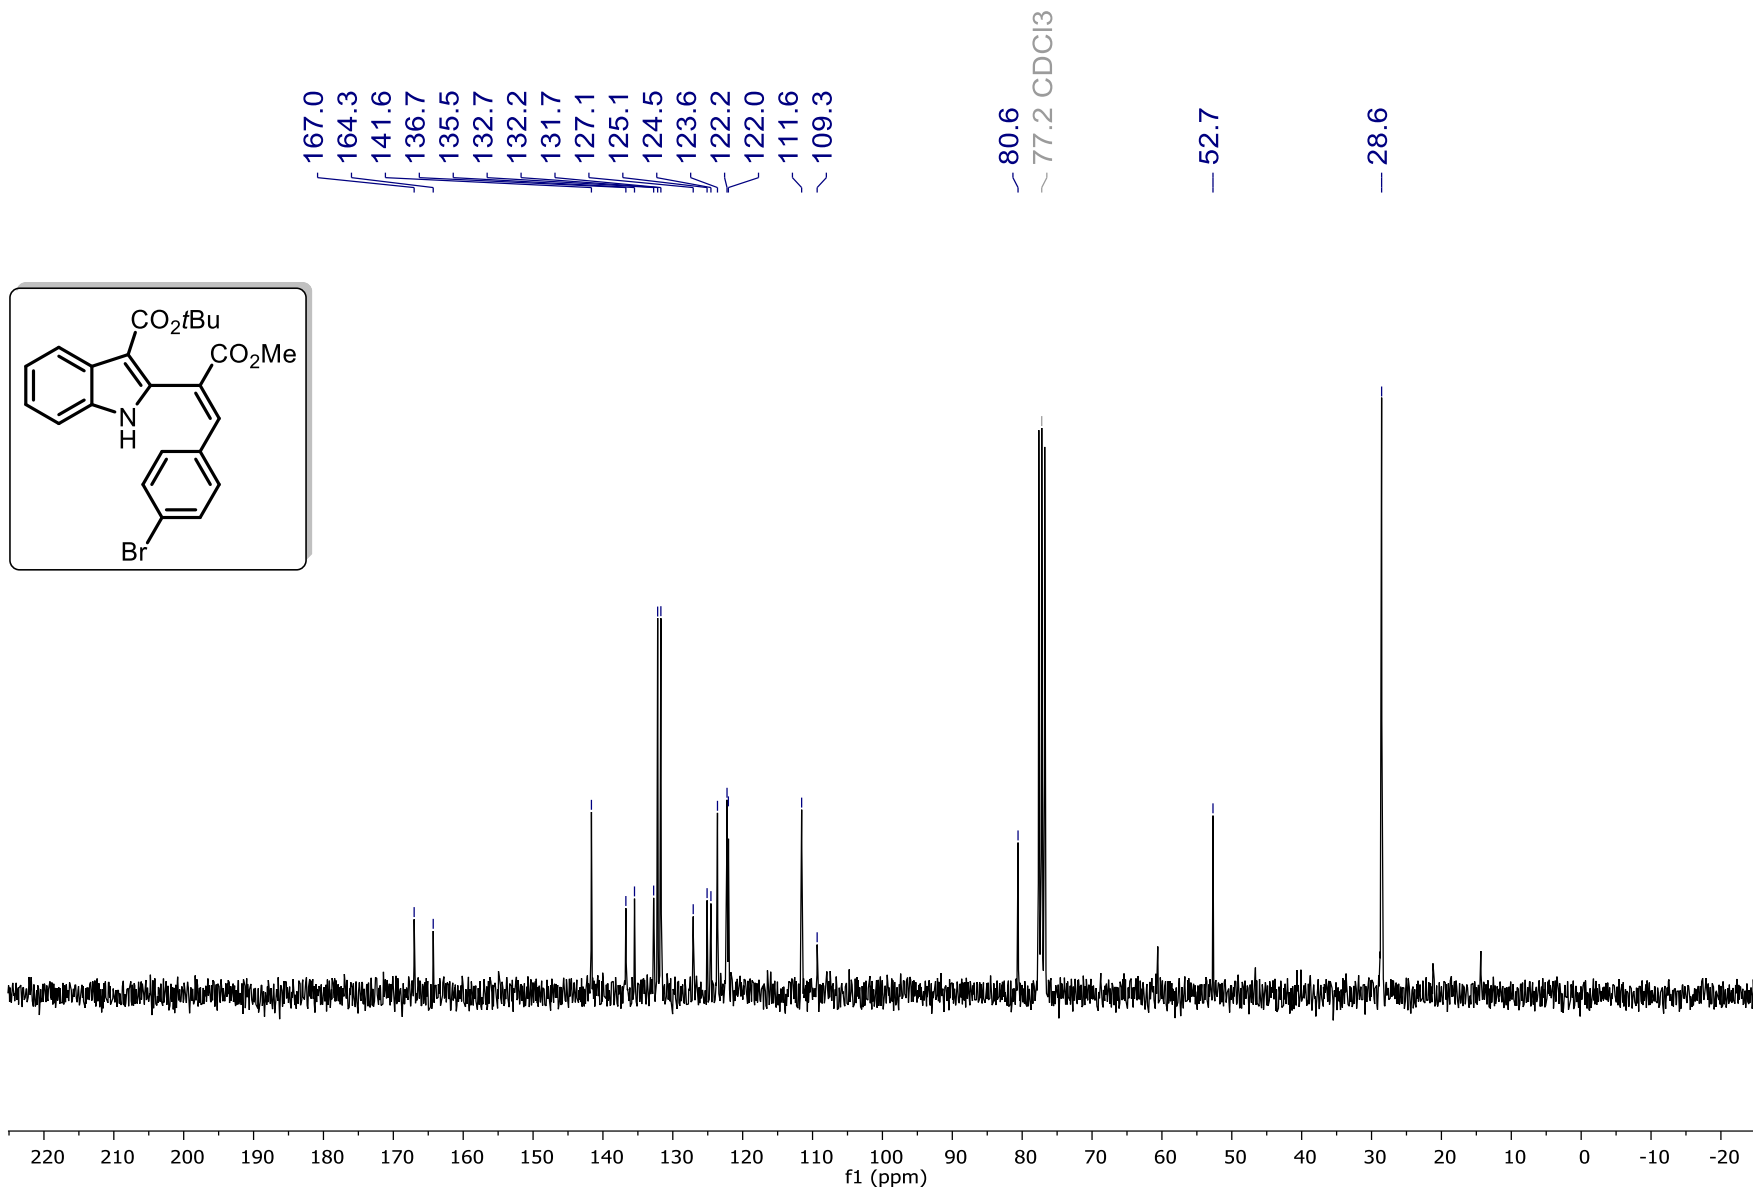

# <sup>1</sup>H and <sup>13</sup>C NMR Spectra of 14j

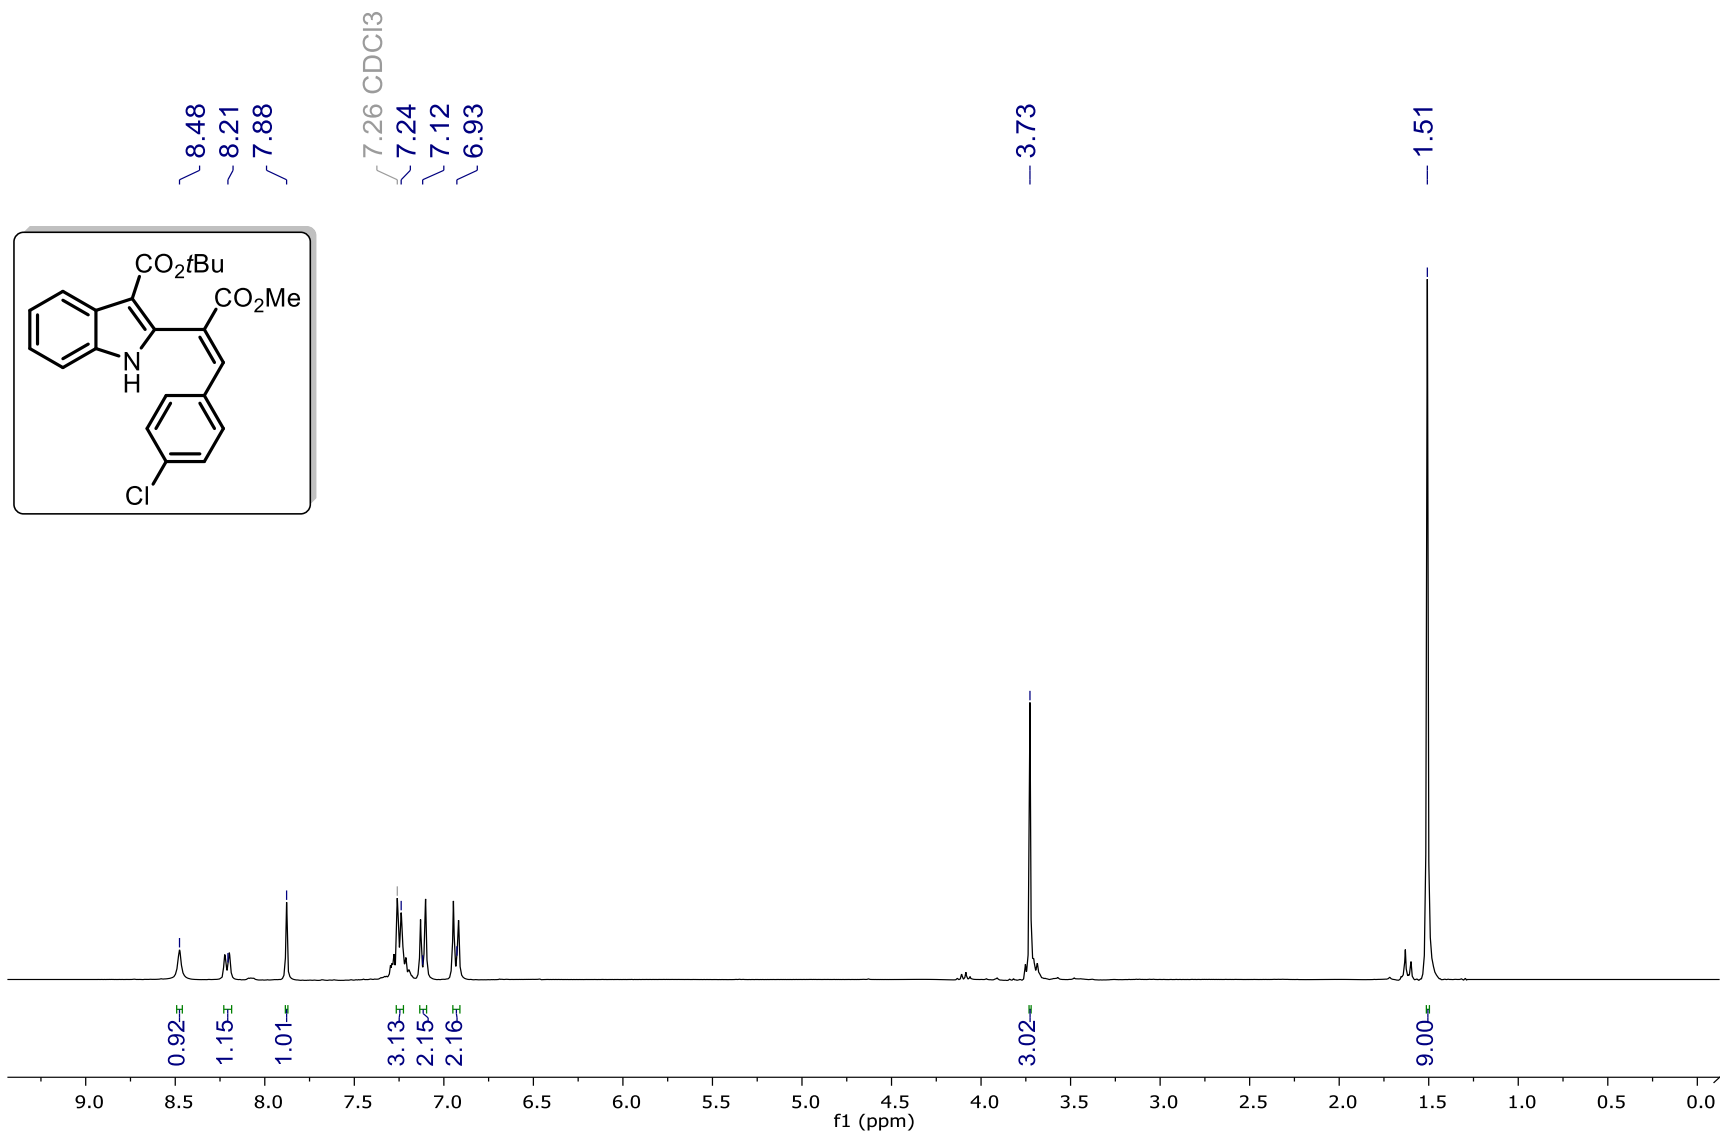

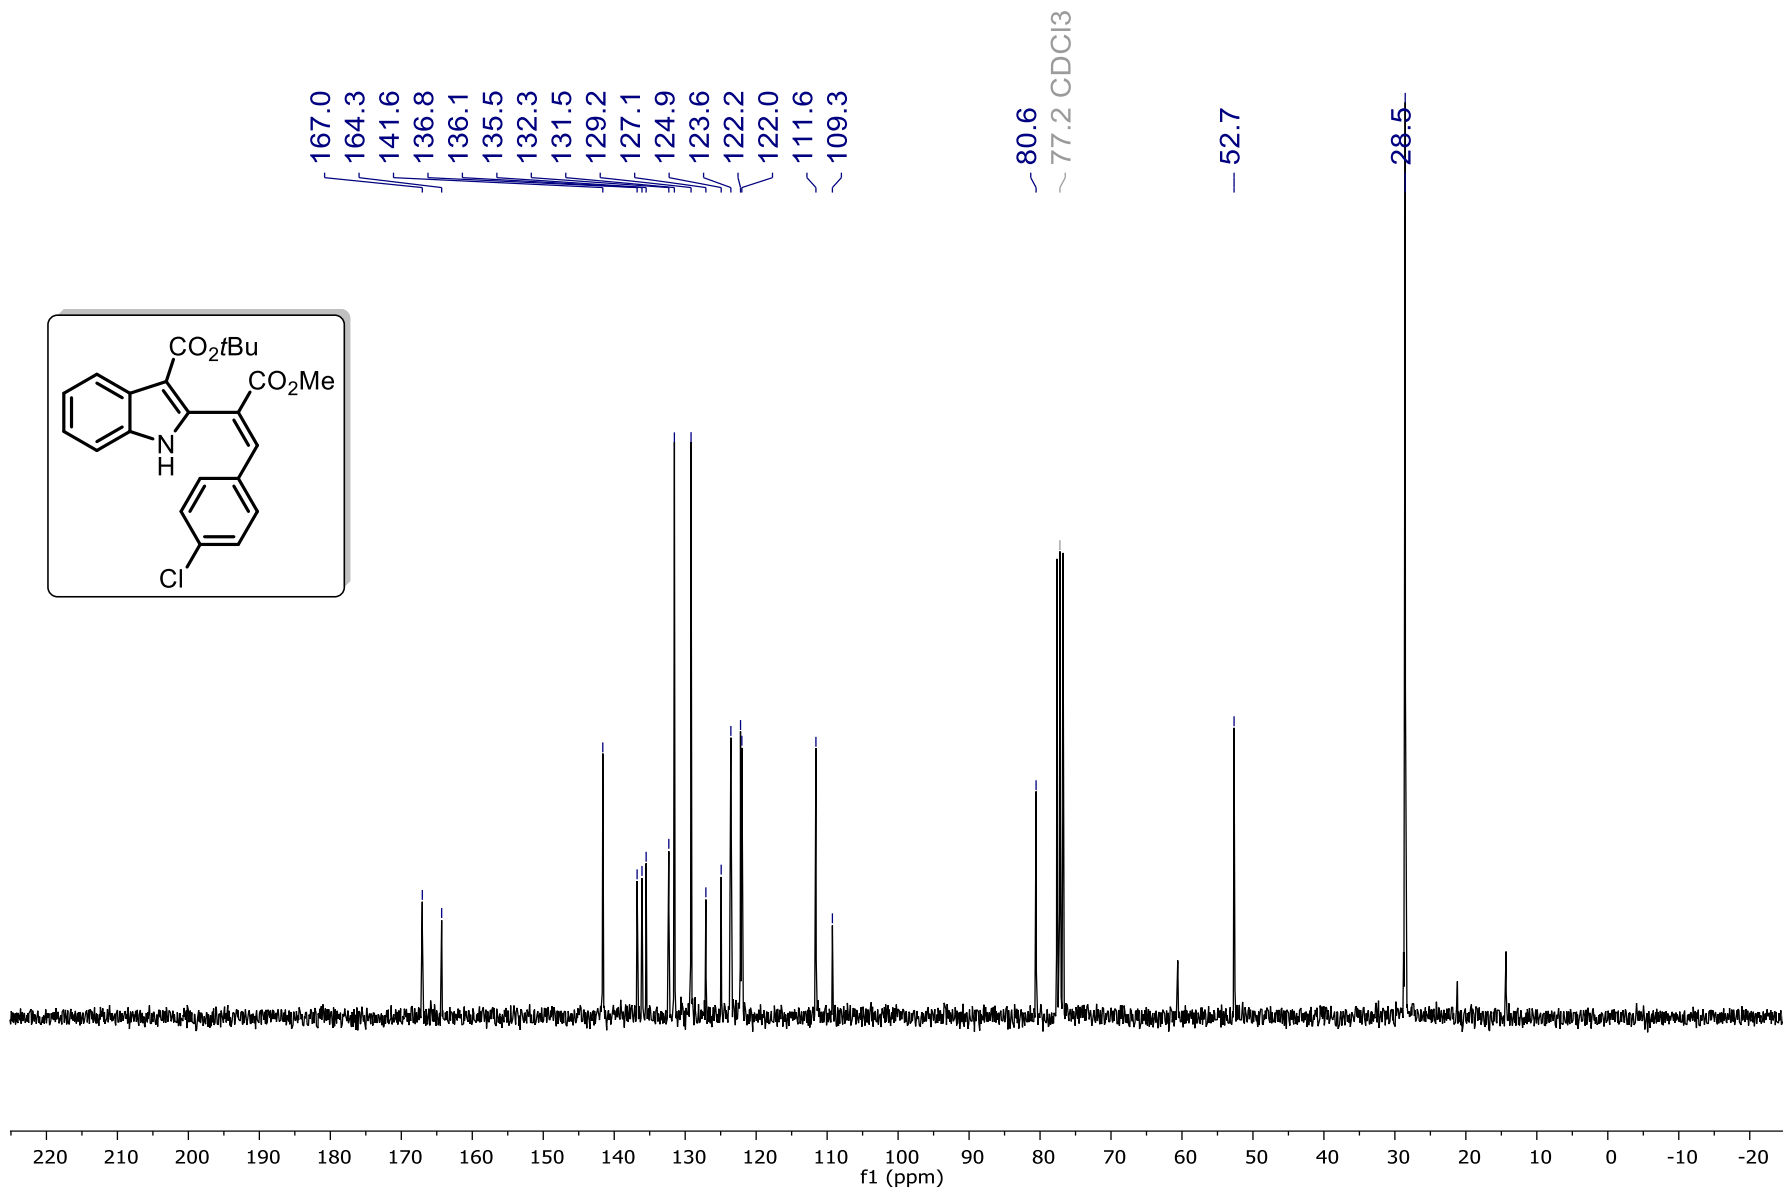

# <sup>1</sup>H and <sup>13</sup>C NMR Spectra of 14k

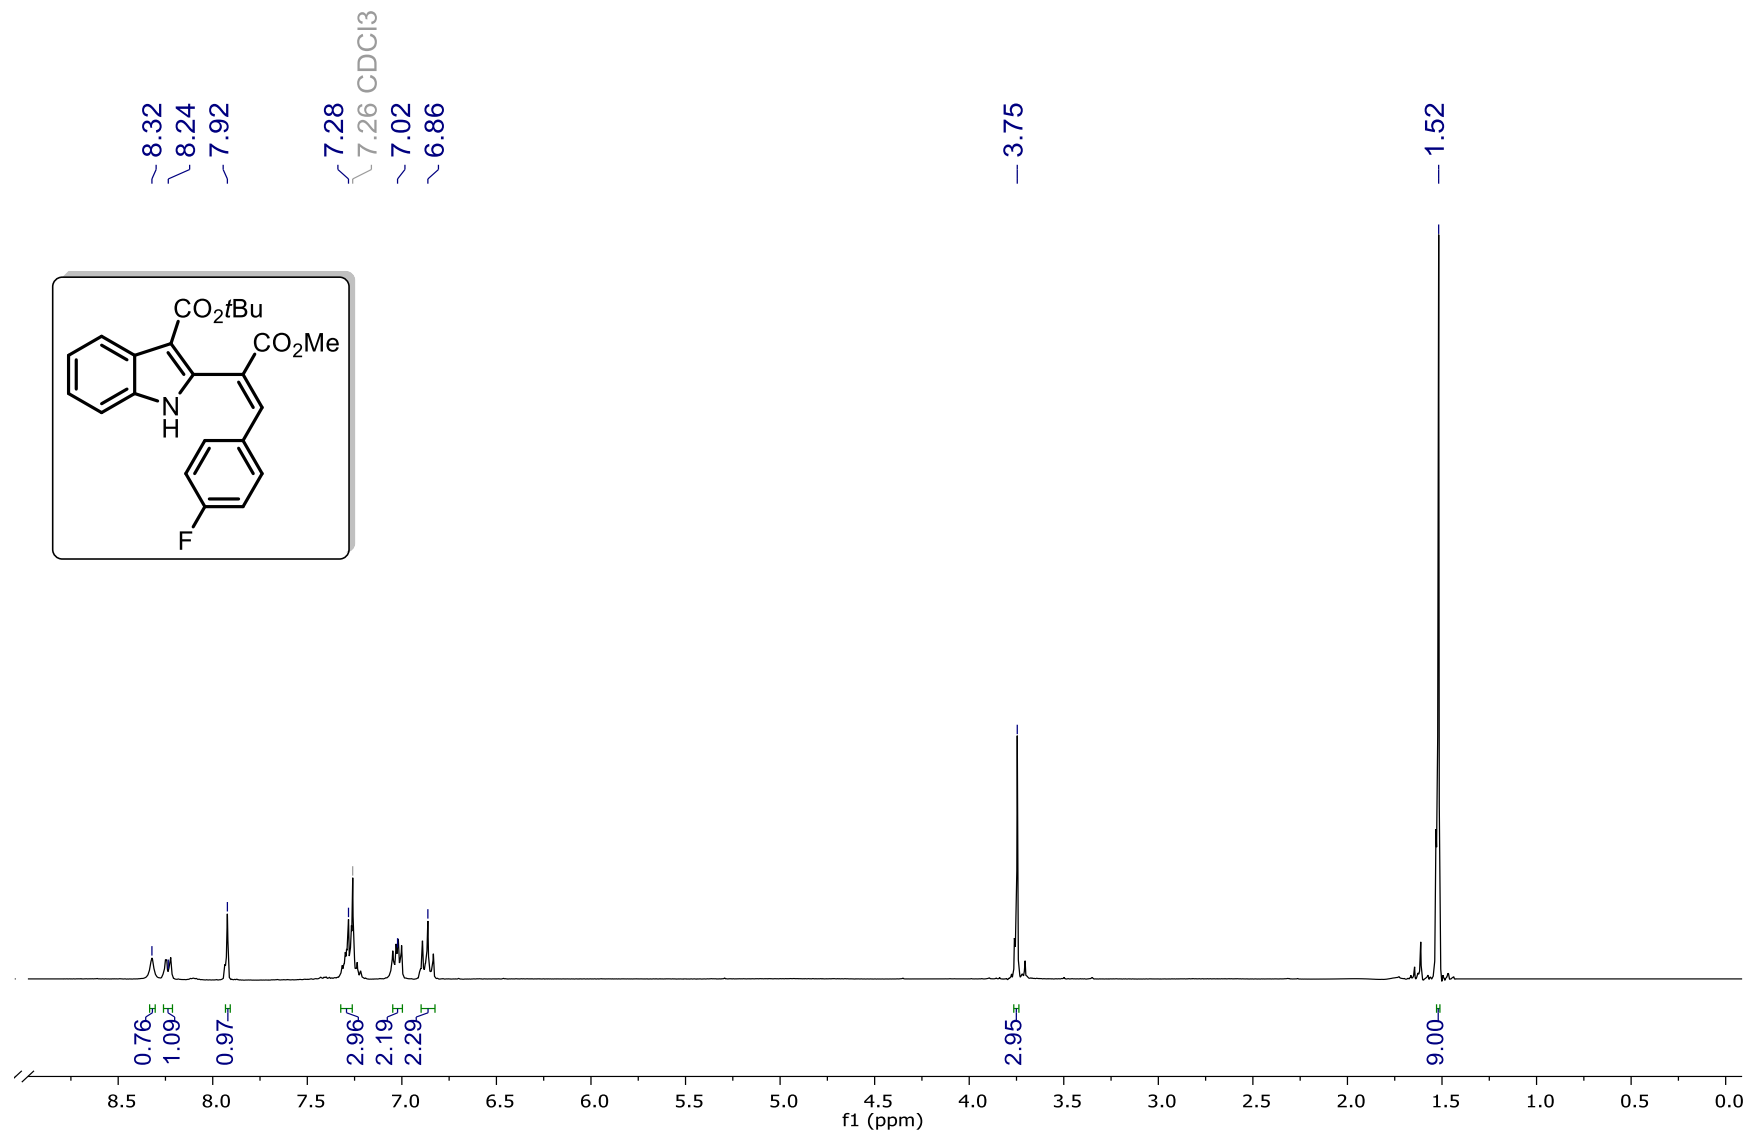

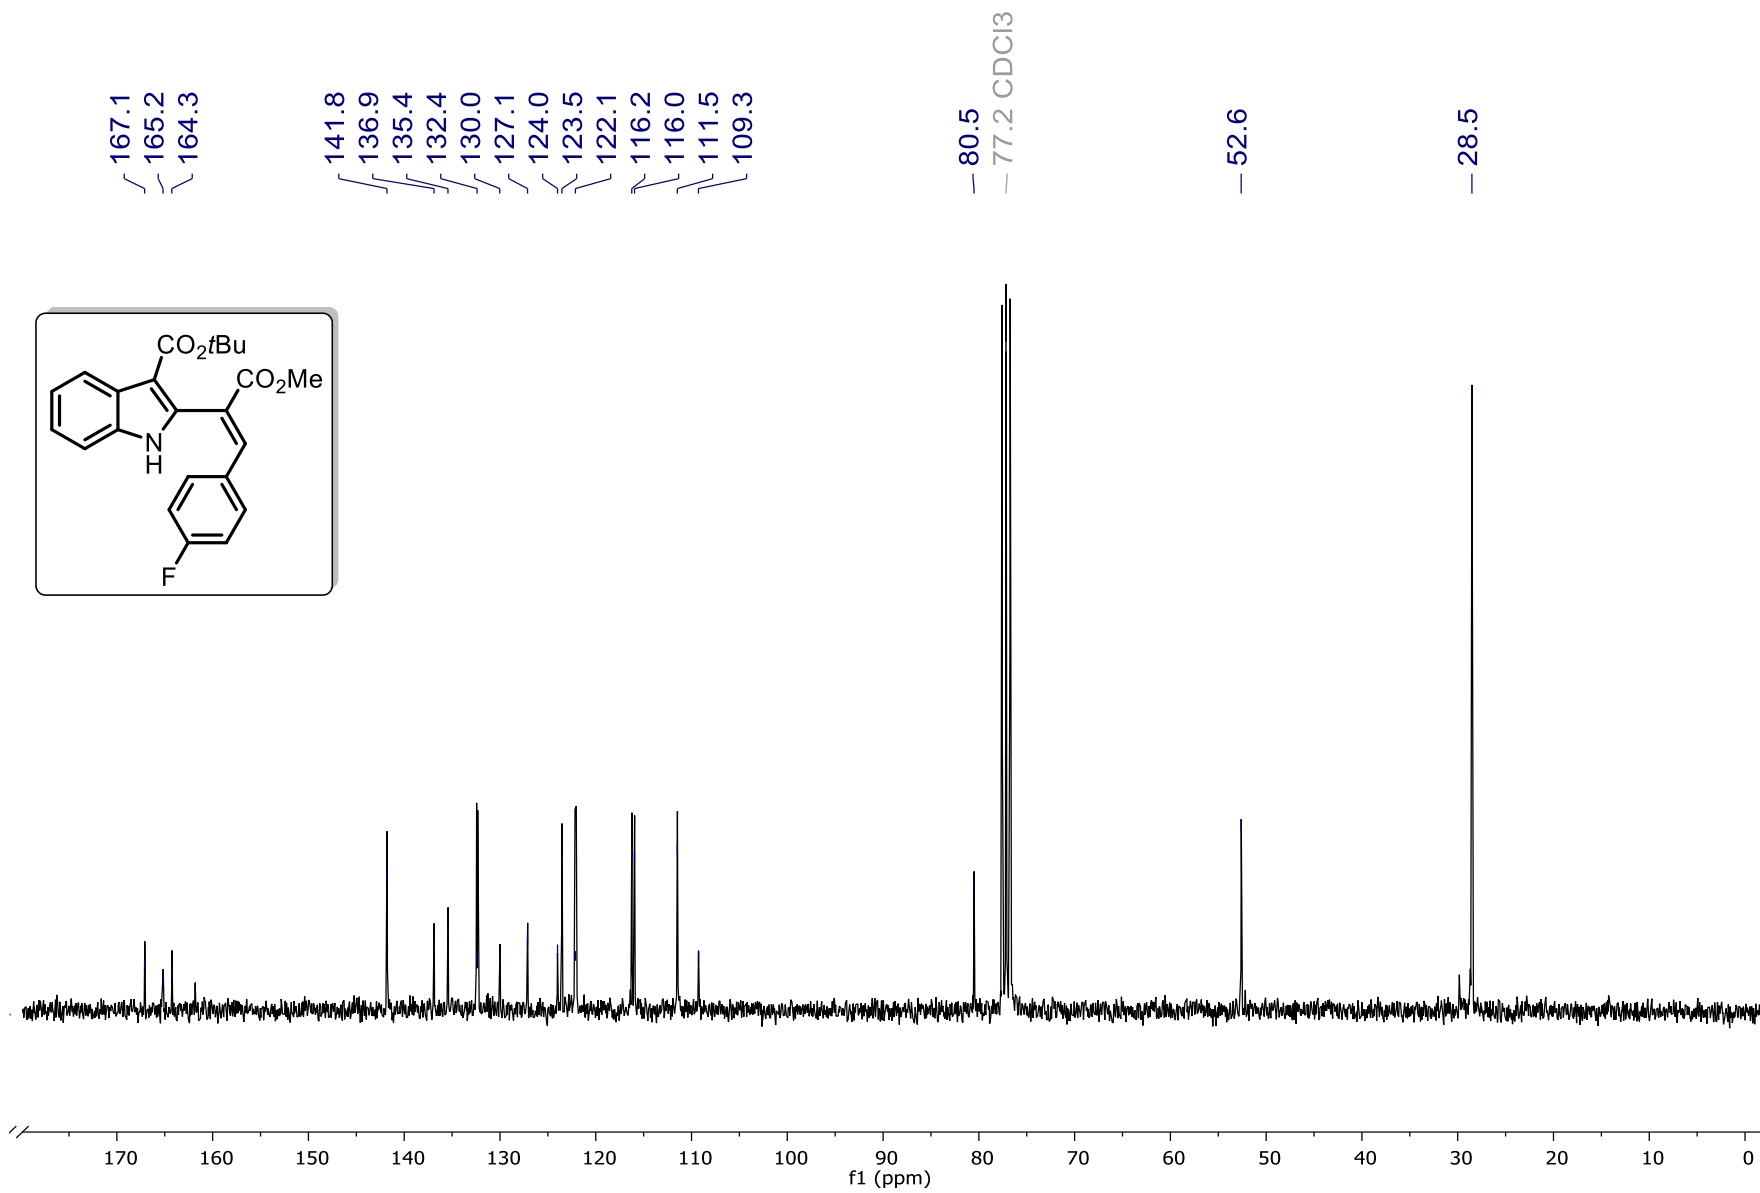

**<sup>1</sup>H, <sup>13</sup>C NMR and NOESY Spectra of prenostodione (3a)**

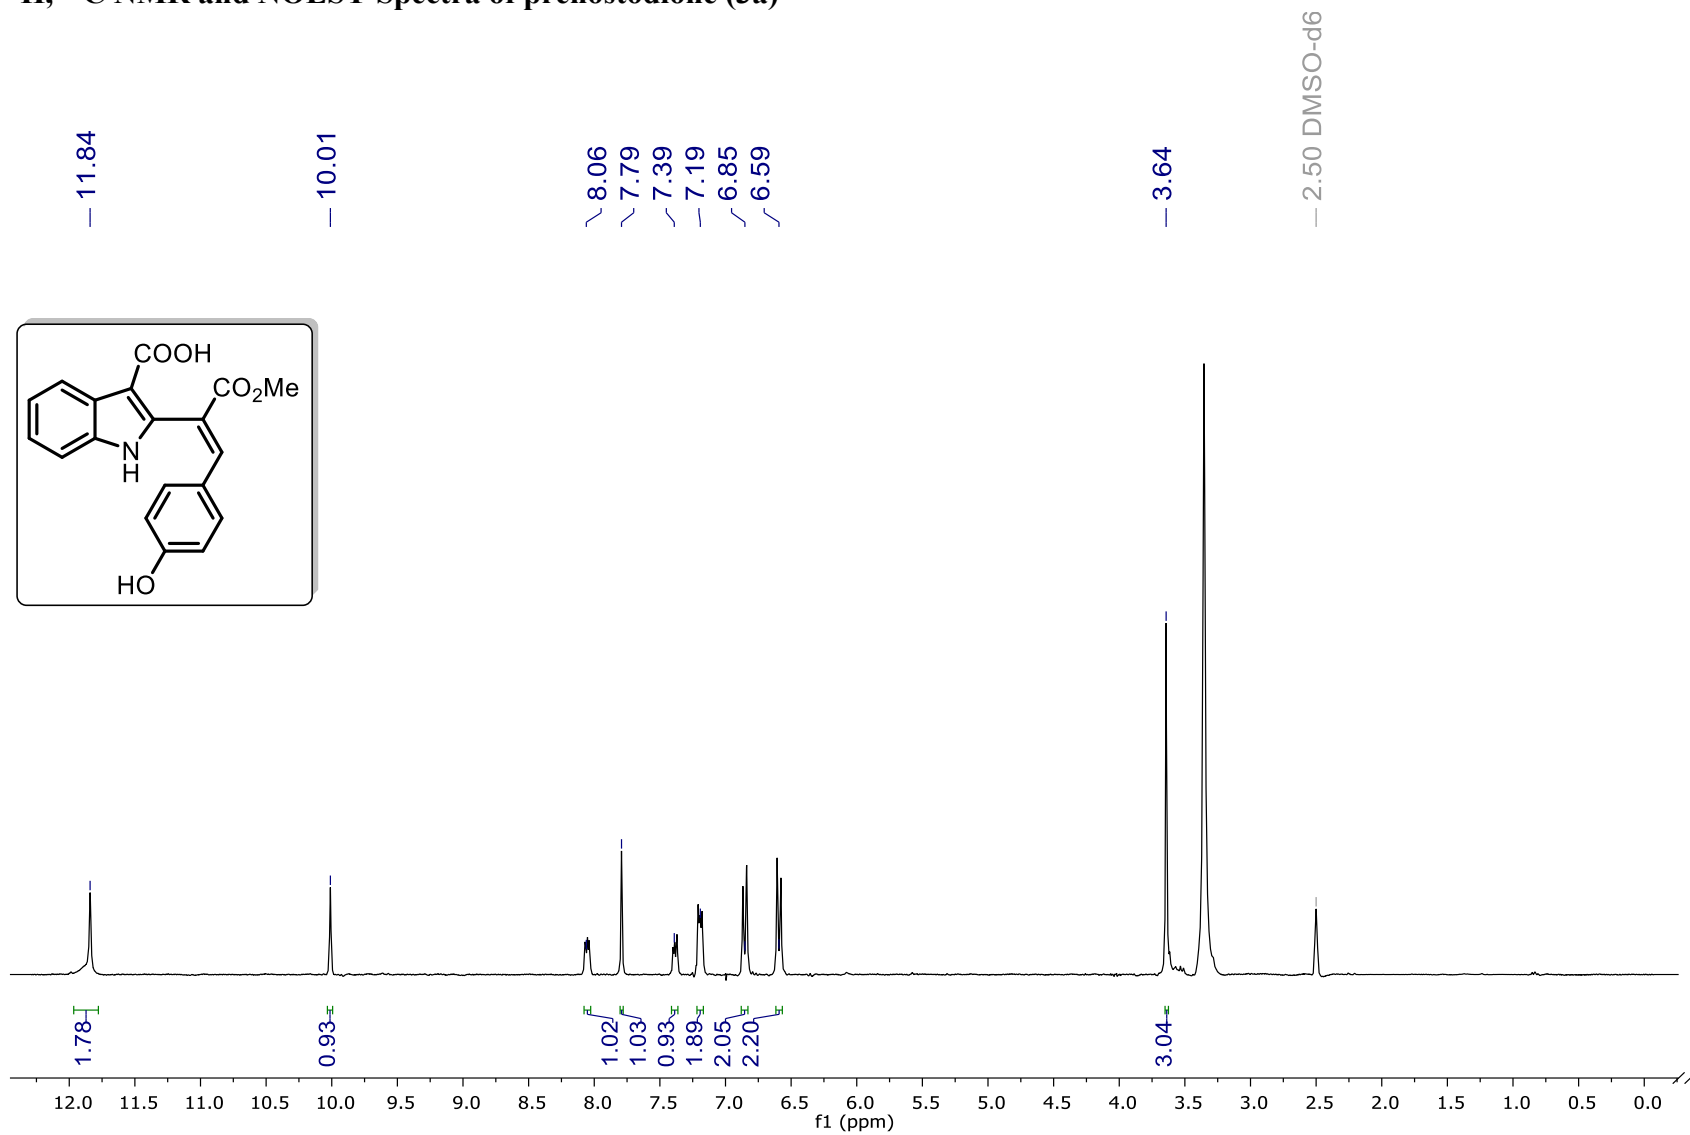

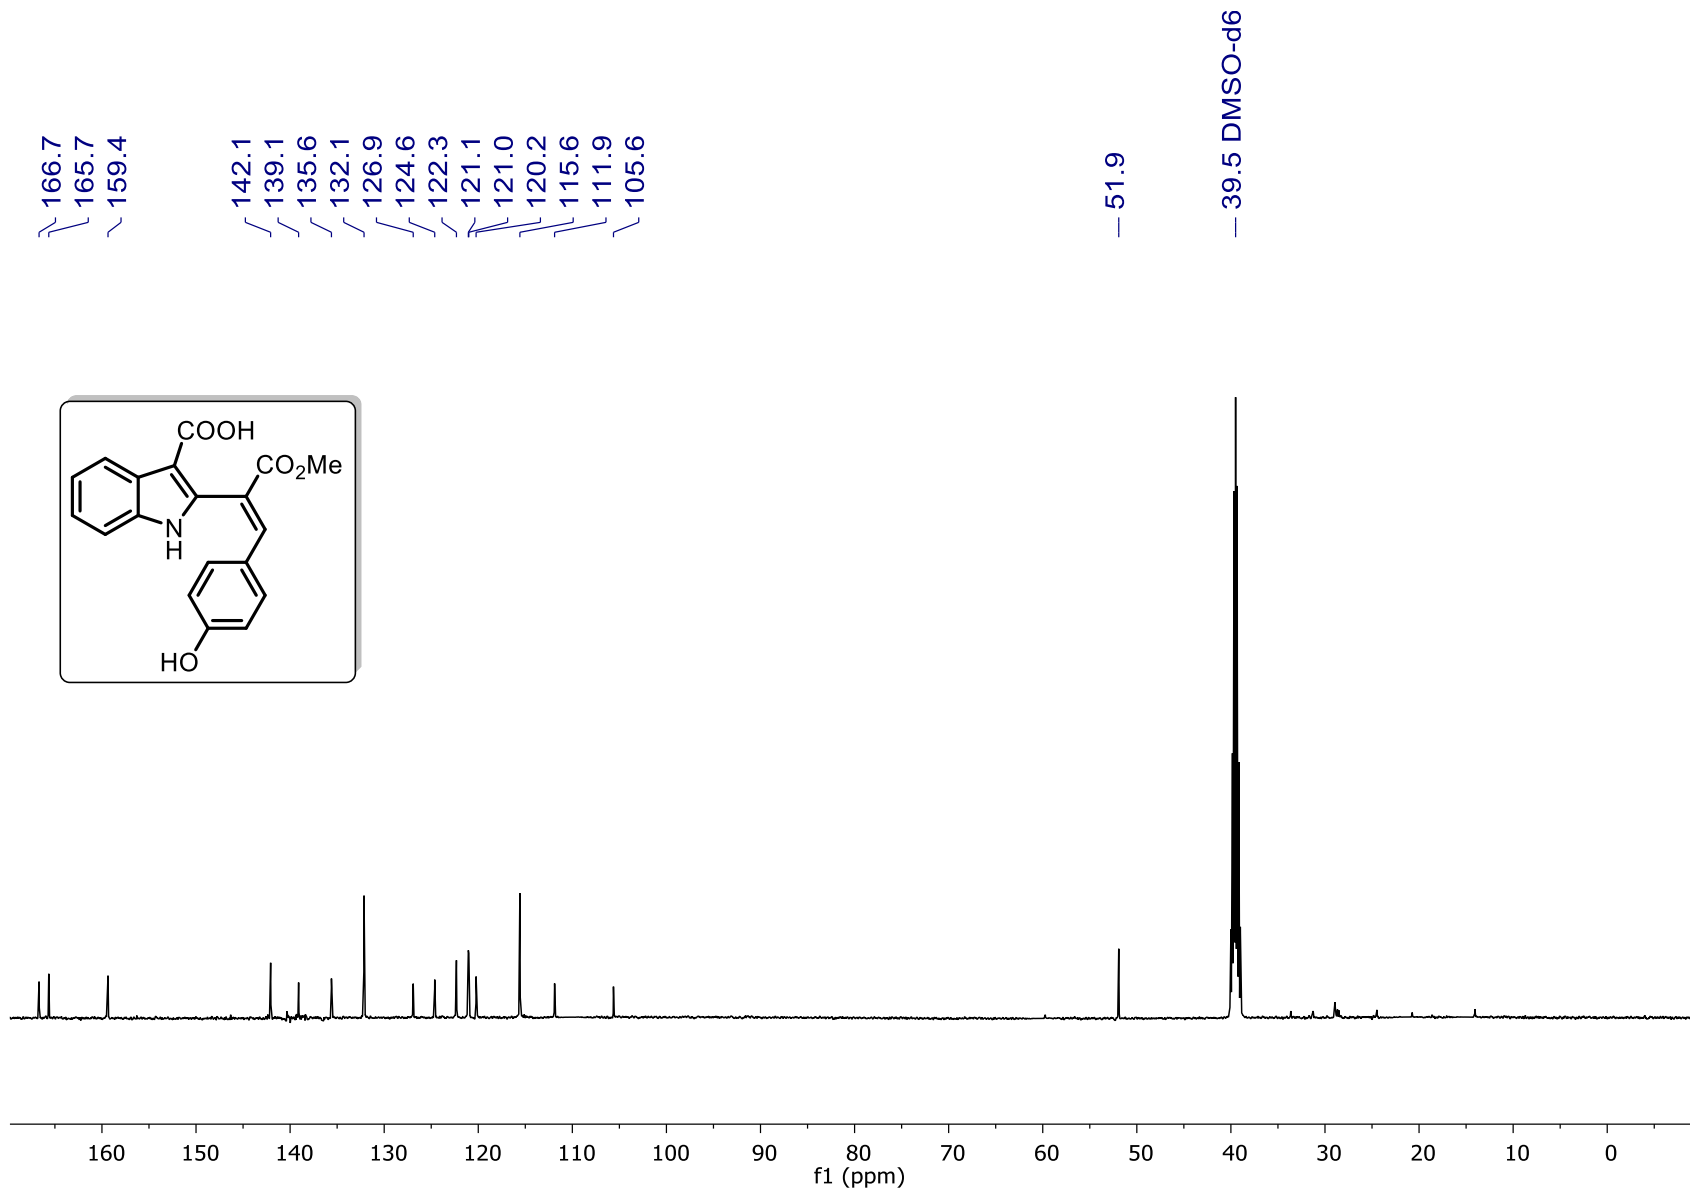



**$^1\text{H}$ ,  $^{13}\text{C}$  NMR and NOESY Spectra of prenostodione (3a)**

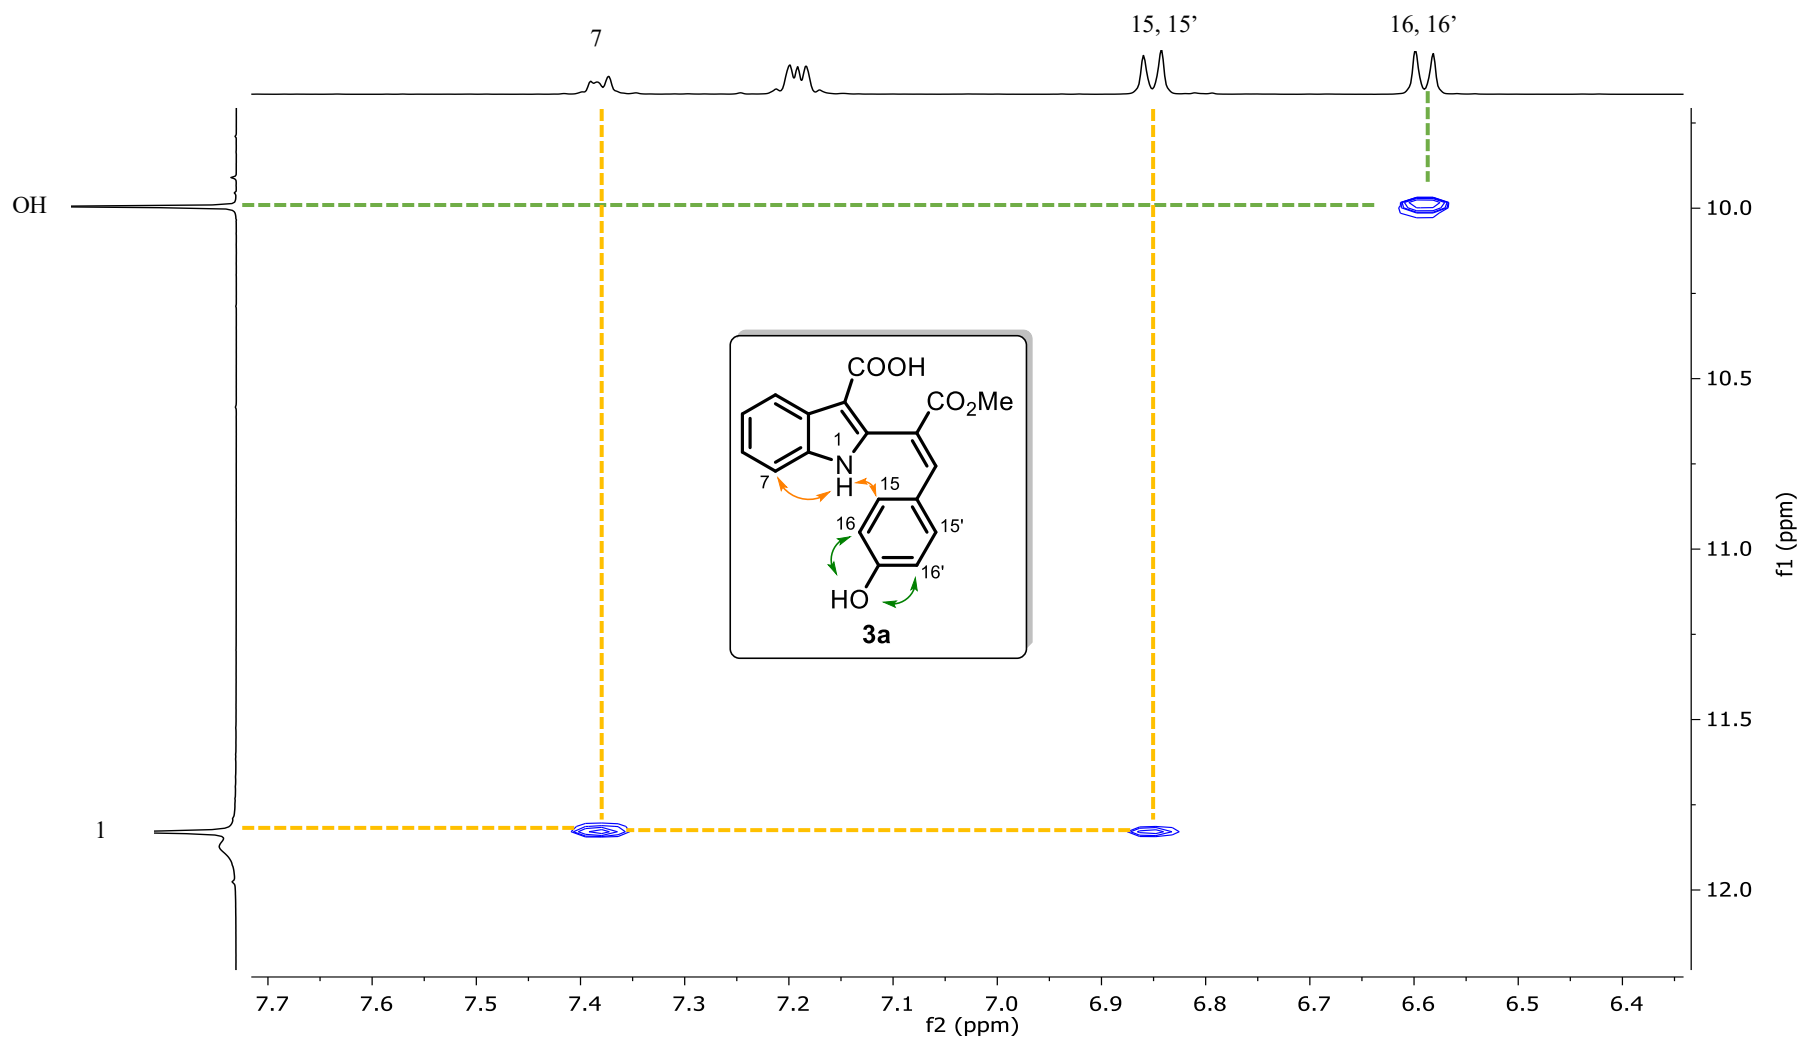

# <sup>1</sup>H and <sup>13</sup>C NMR Spectra of 3b

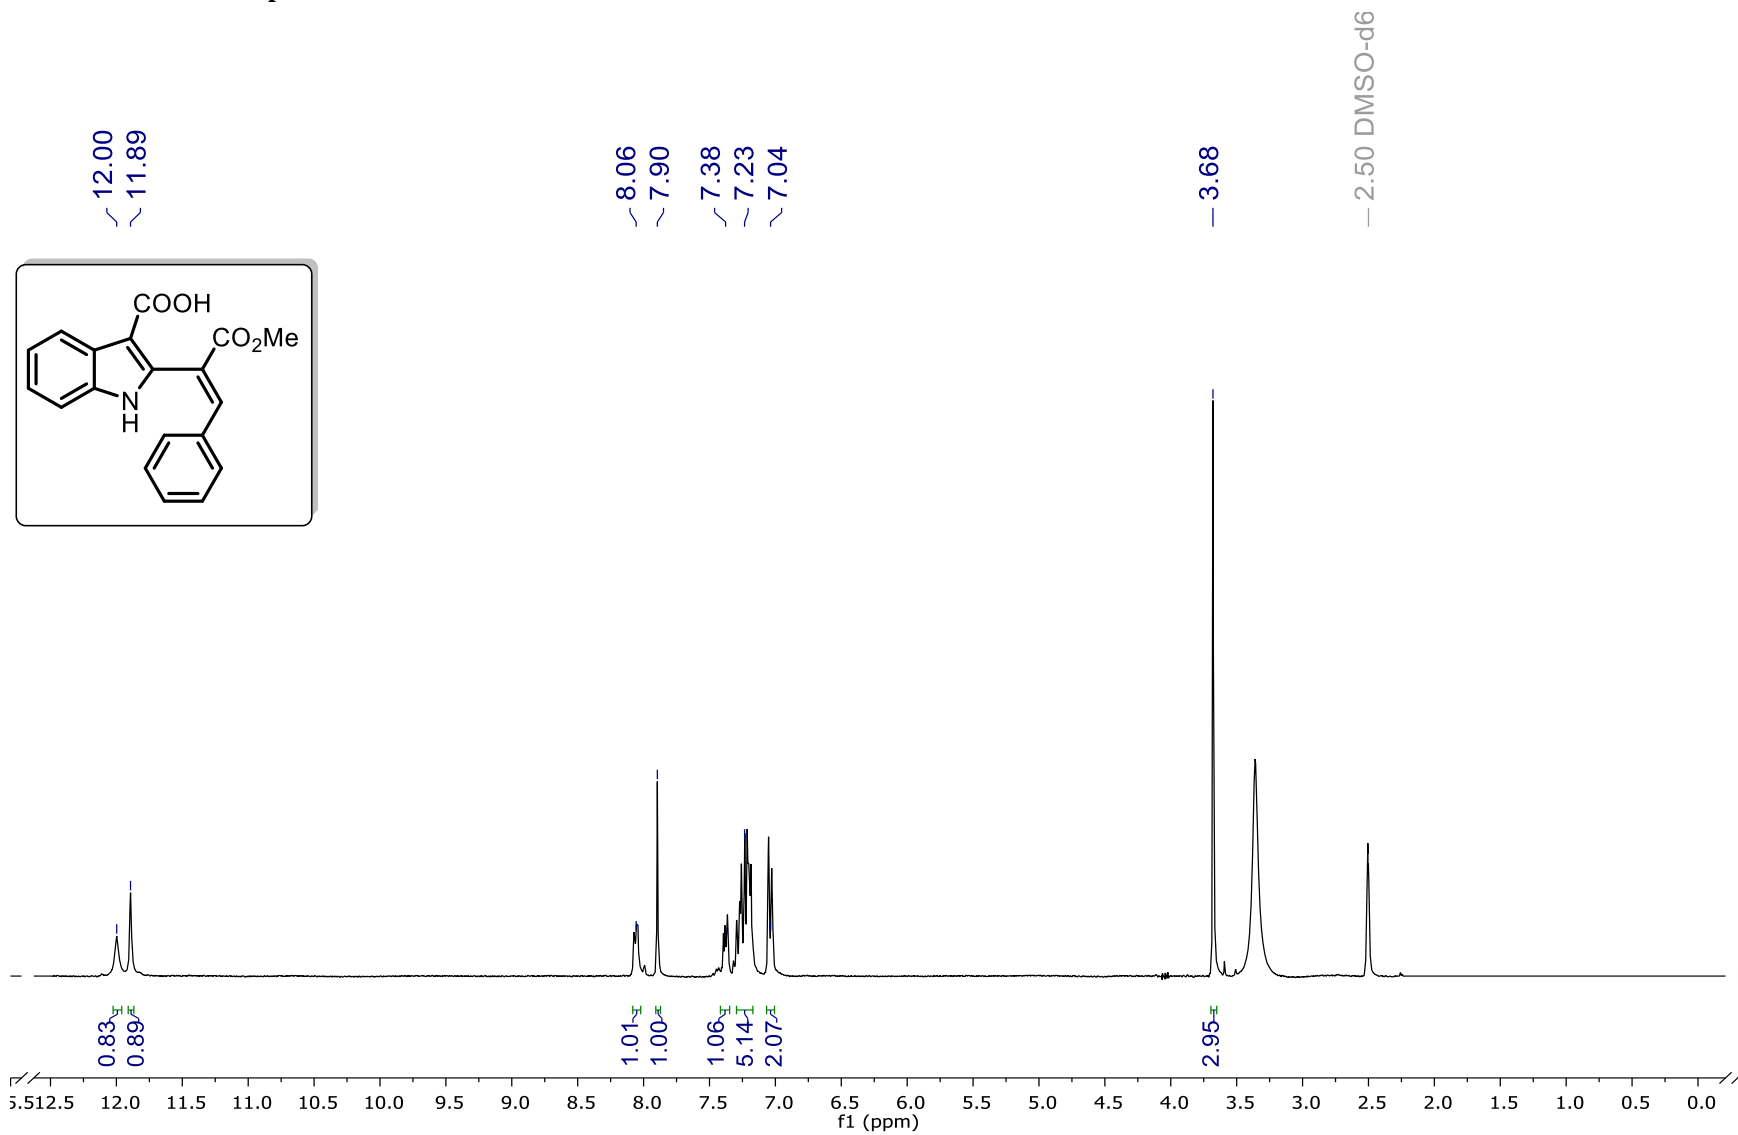

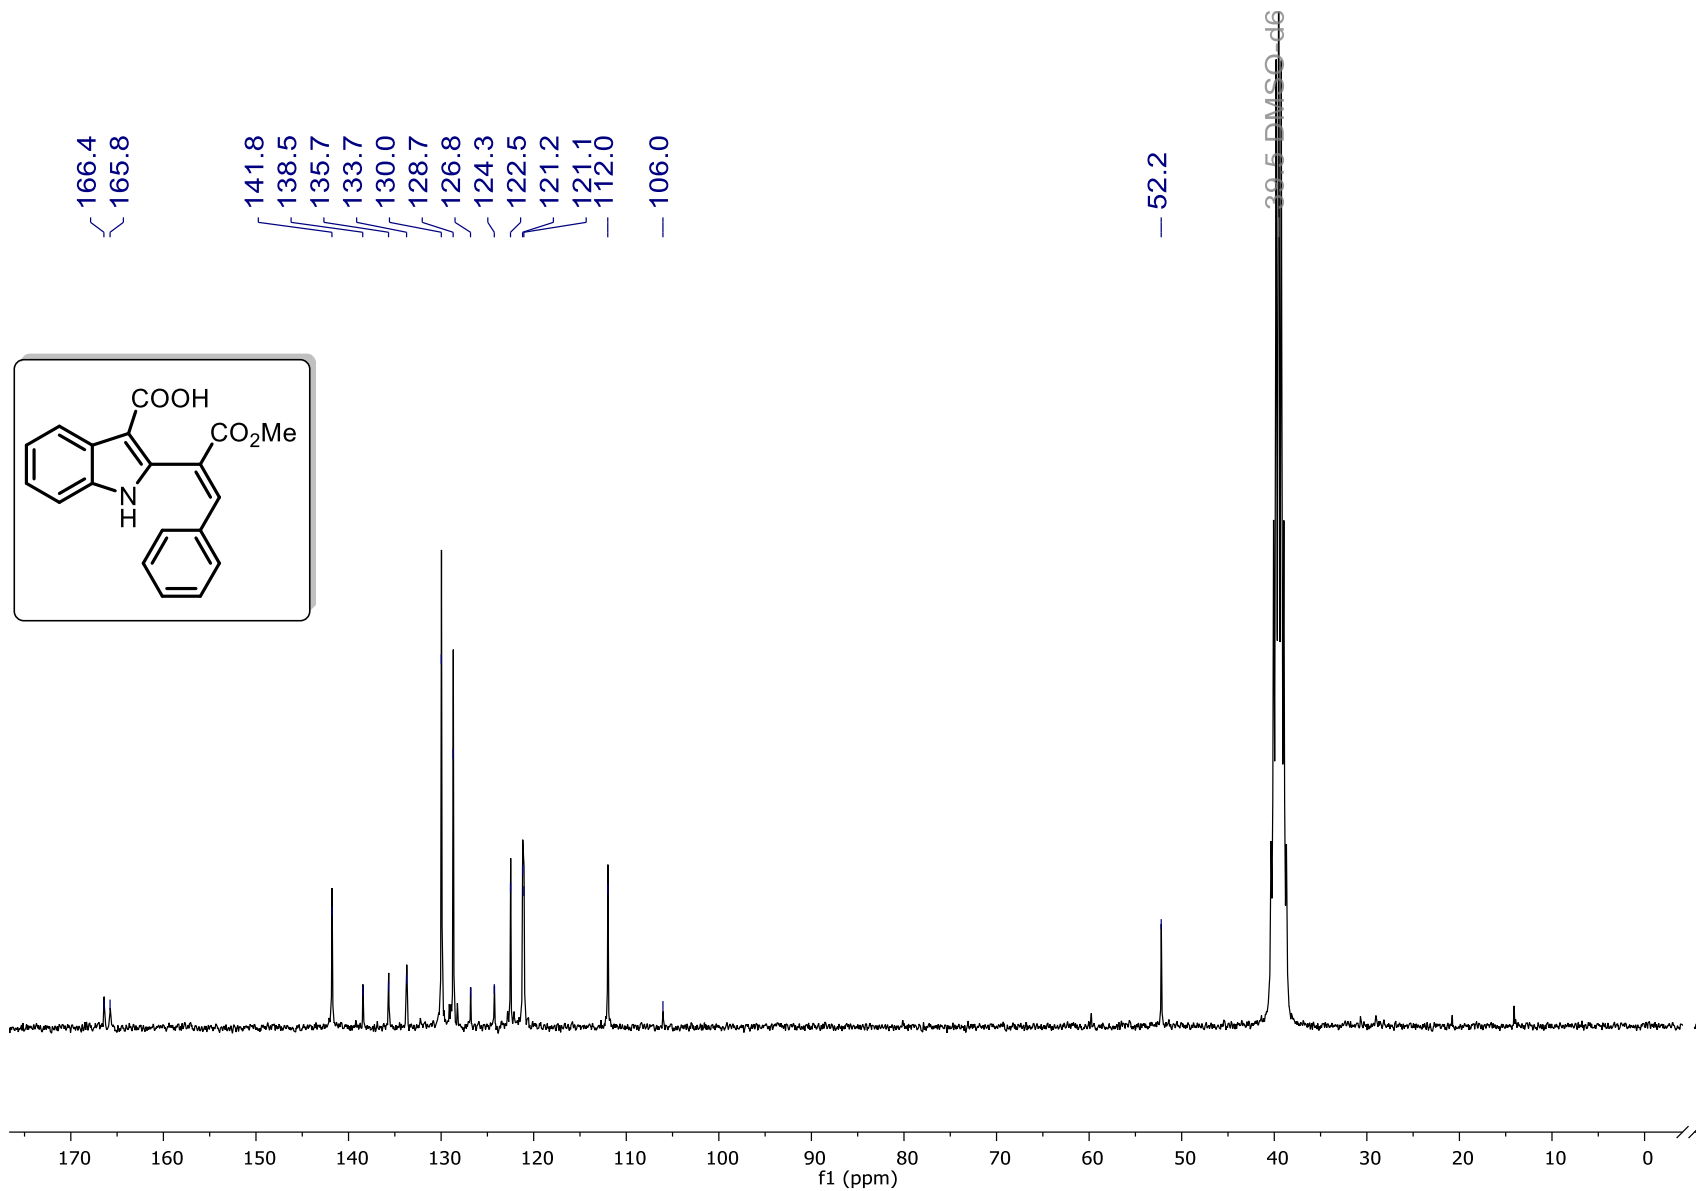

# <sup>1</sup>H and <sup>13</sup>C NMR Spectra of 3c

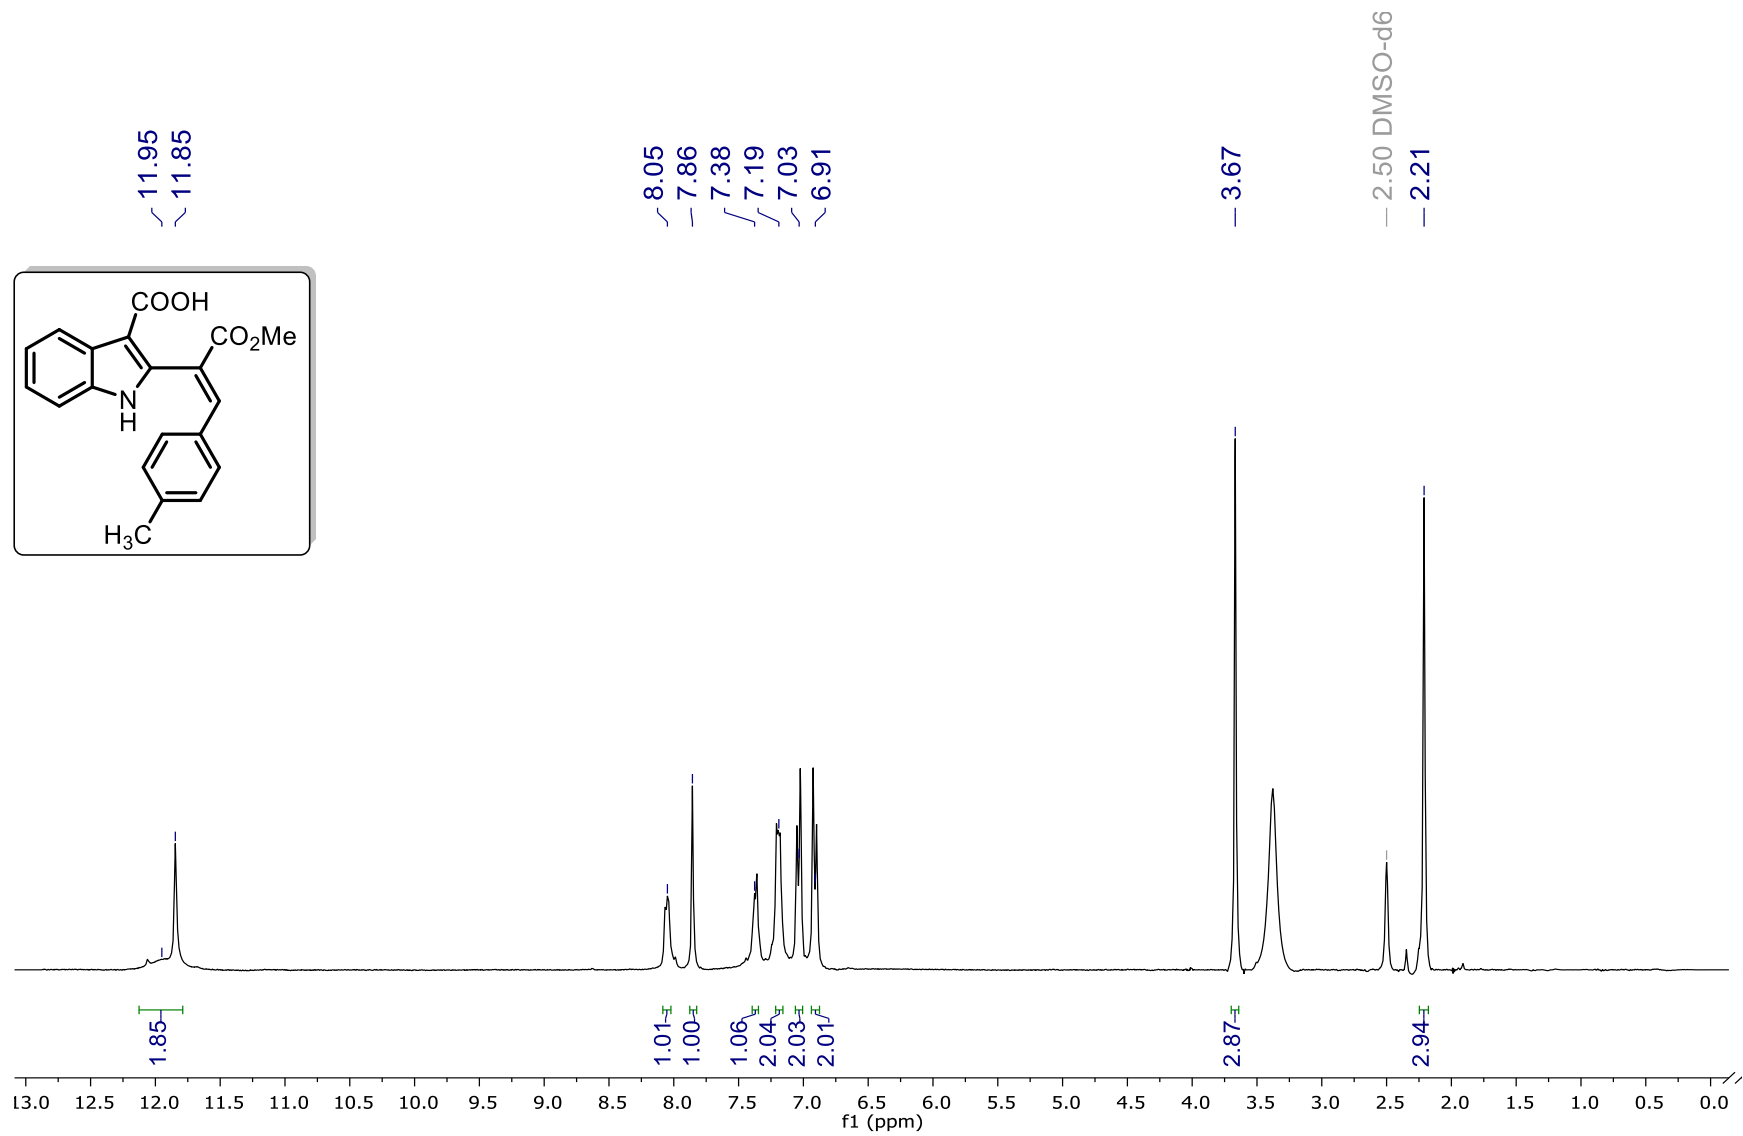

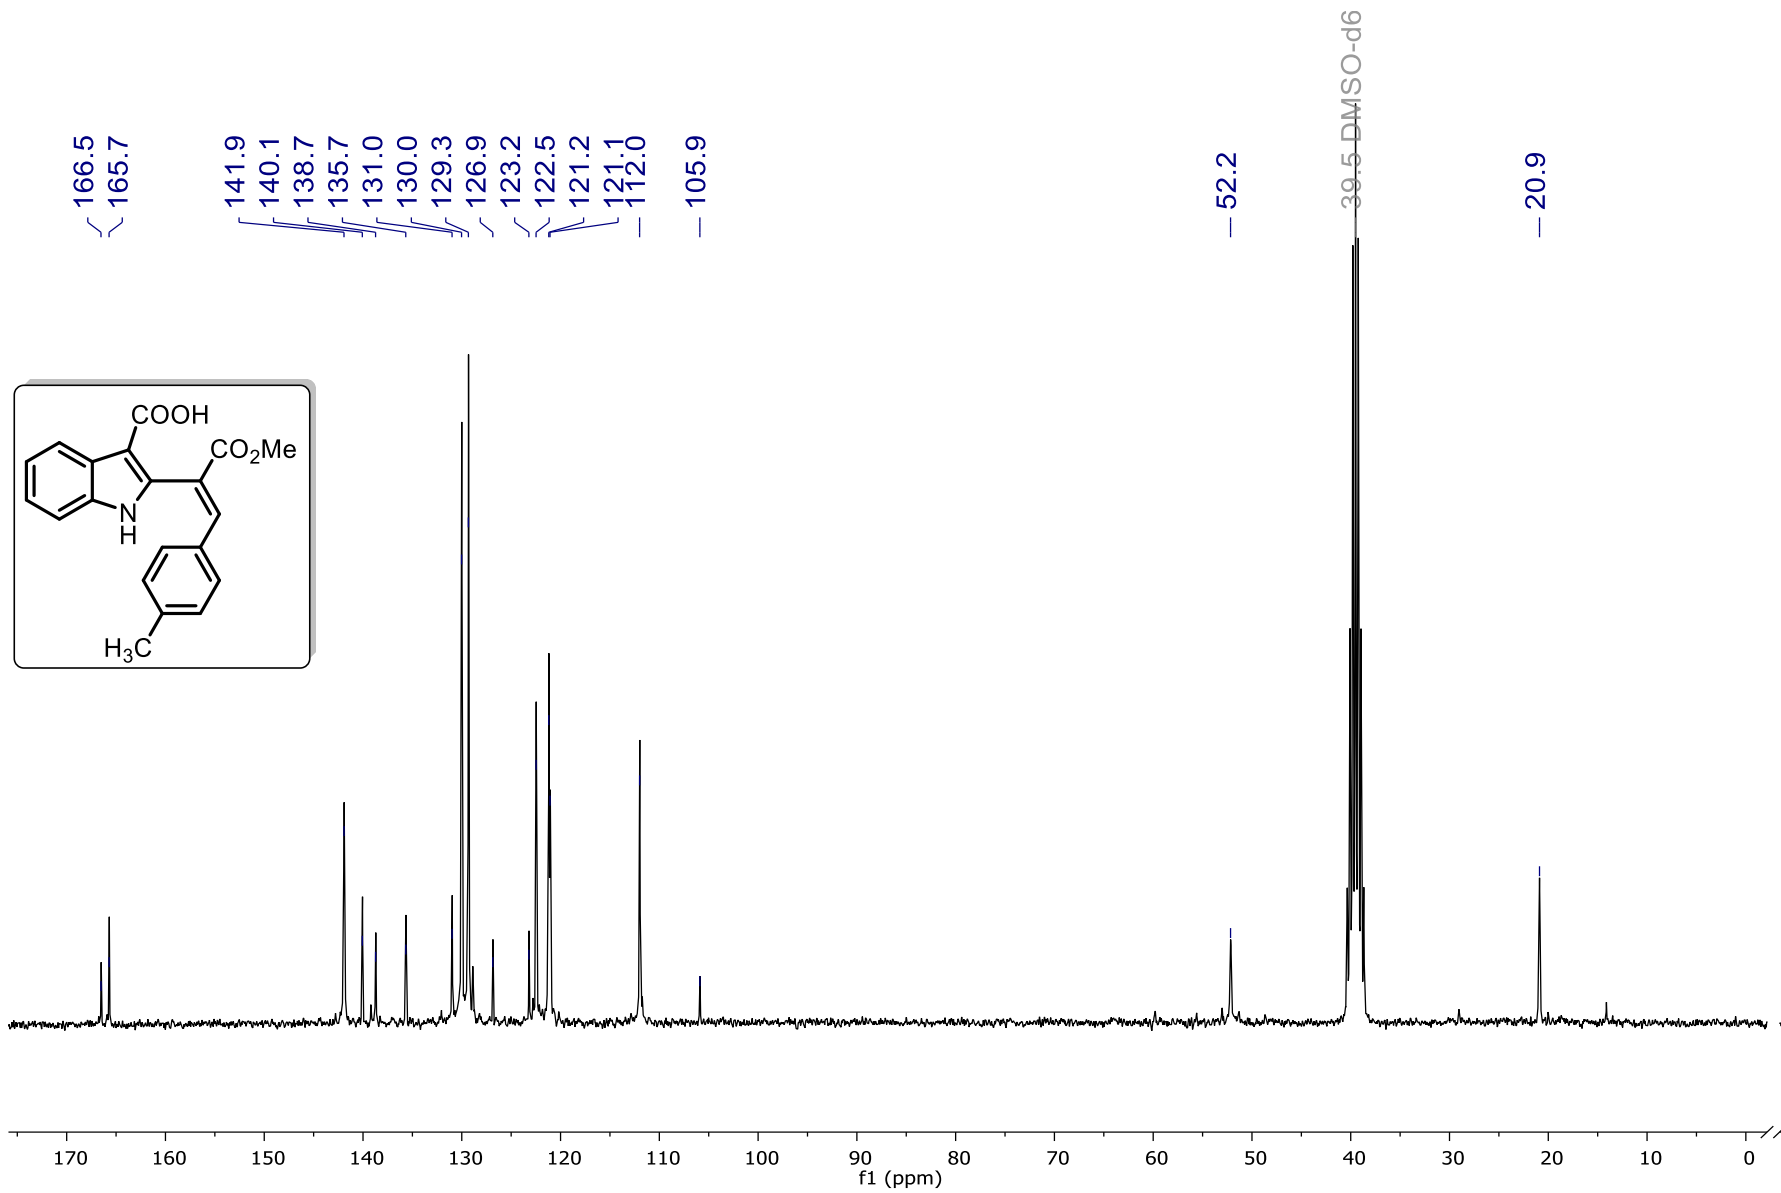

# <sup>1</sup>H and <sup>13</sup>C NMR Spectra of 3d

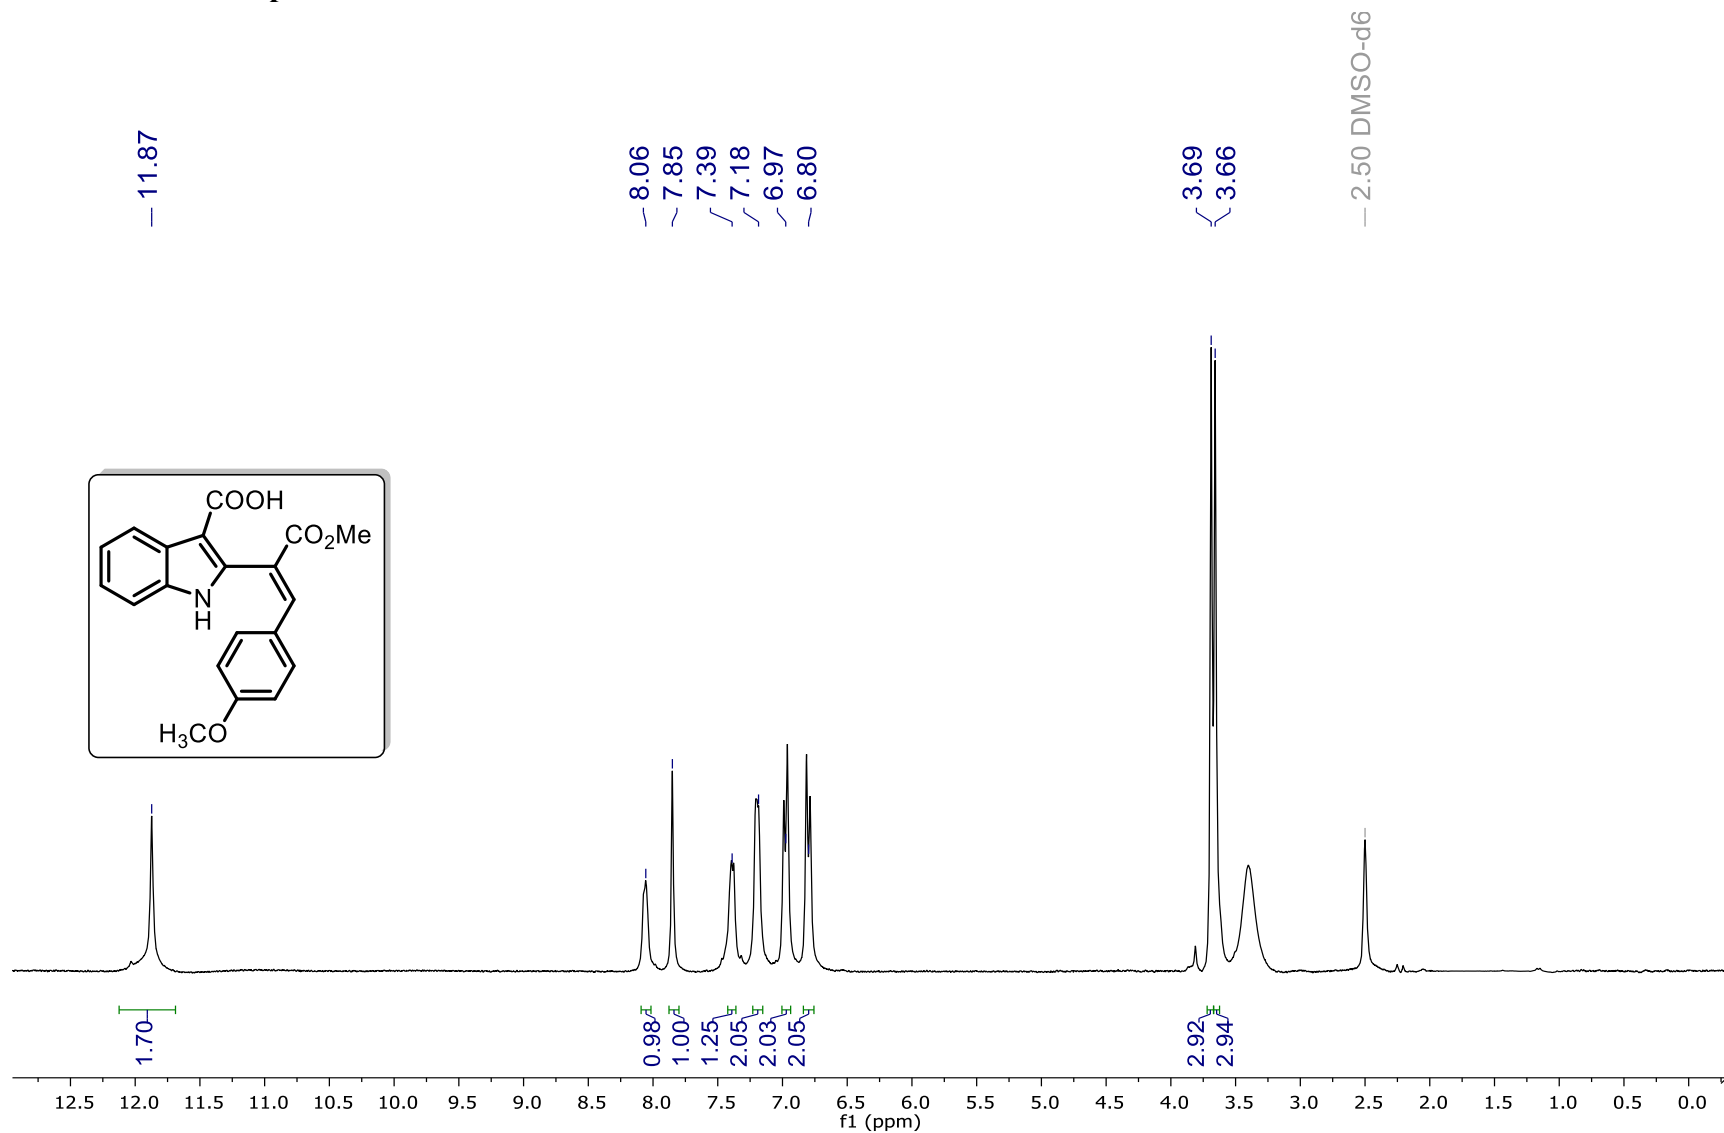

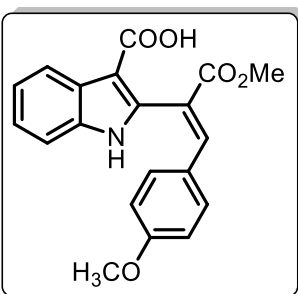

166.6  
165.7  
160.7

141.7  
138.9  
135.7  
131.9  
126.9  
126.2  
122.4  
121.3  
121.1  
121.1  
114.3  
112.0  
105.7

55.3  
52.0

29.5 DMSO-d<sub>6</sub>

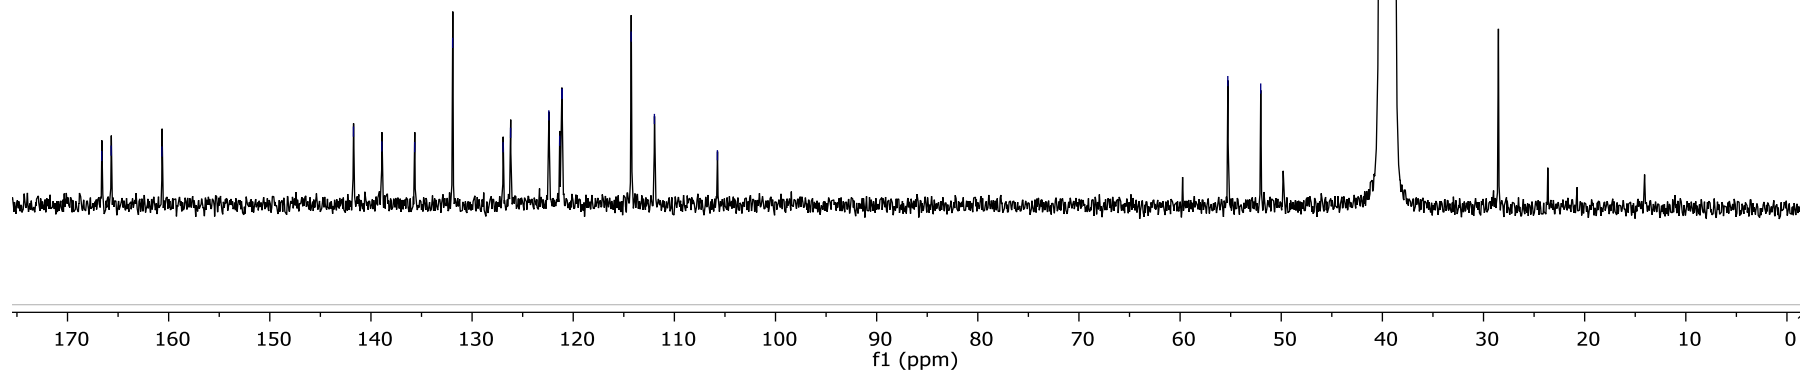

# <sup>1</sup>H and <sup>13</sup>C NMR Spectra of 3e

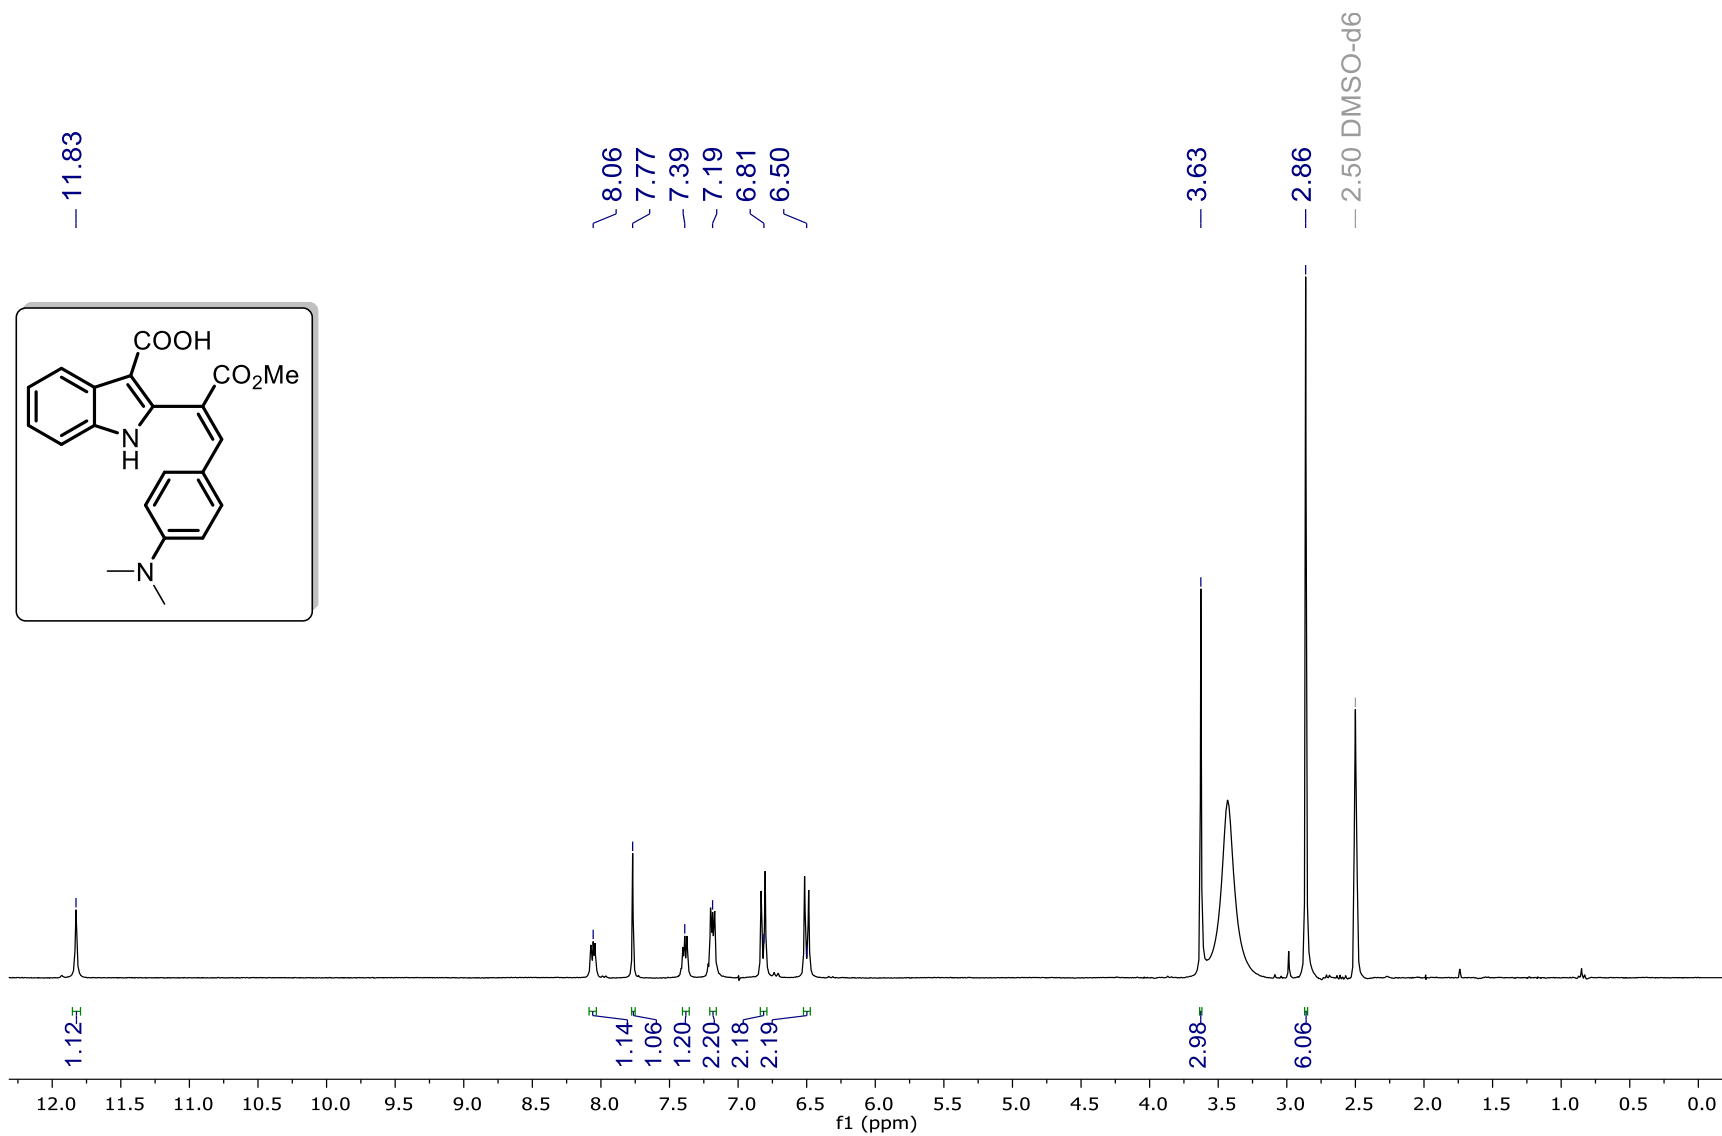



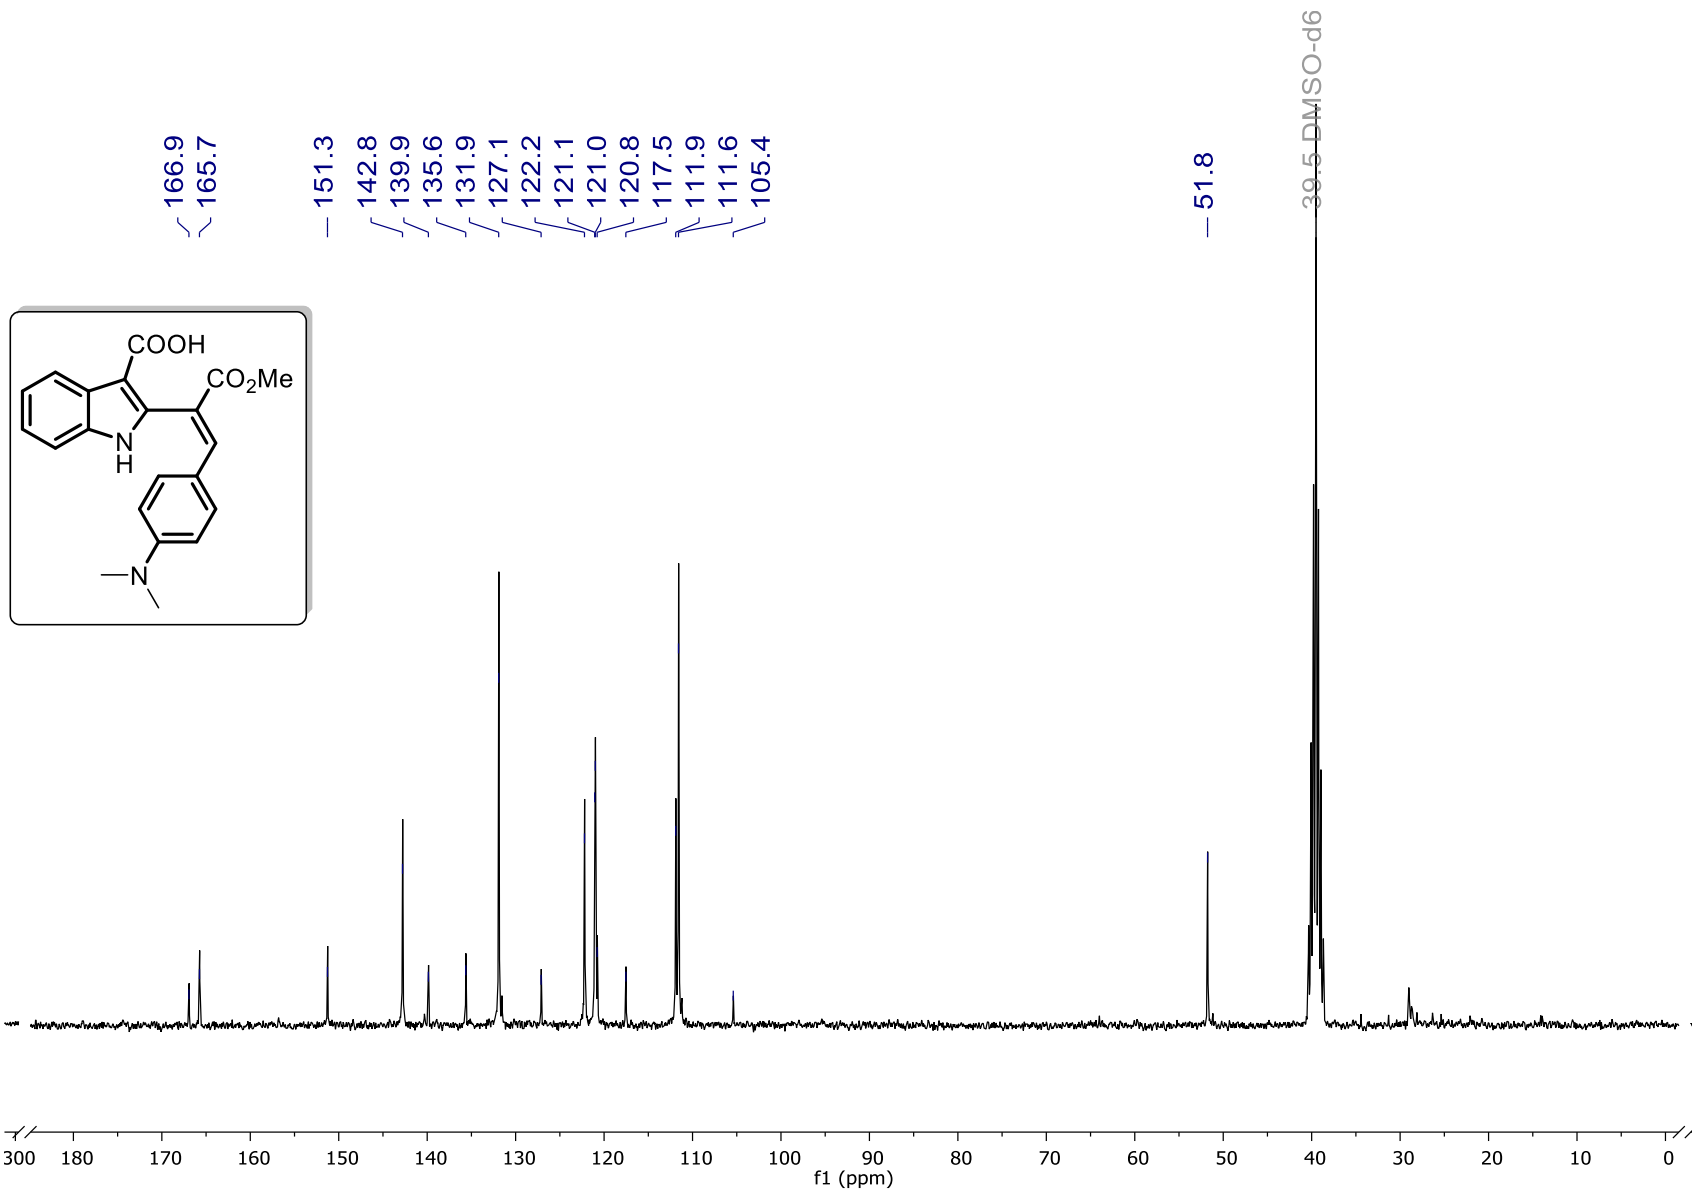

# <sup>1</sup>H and <sup>13</sup>C NMR Spectra of 3f

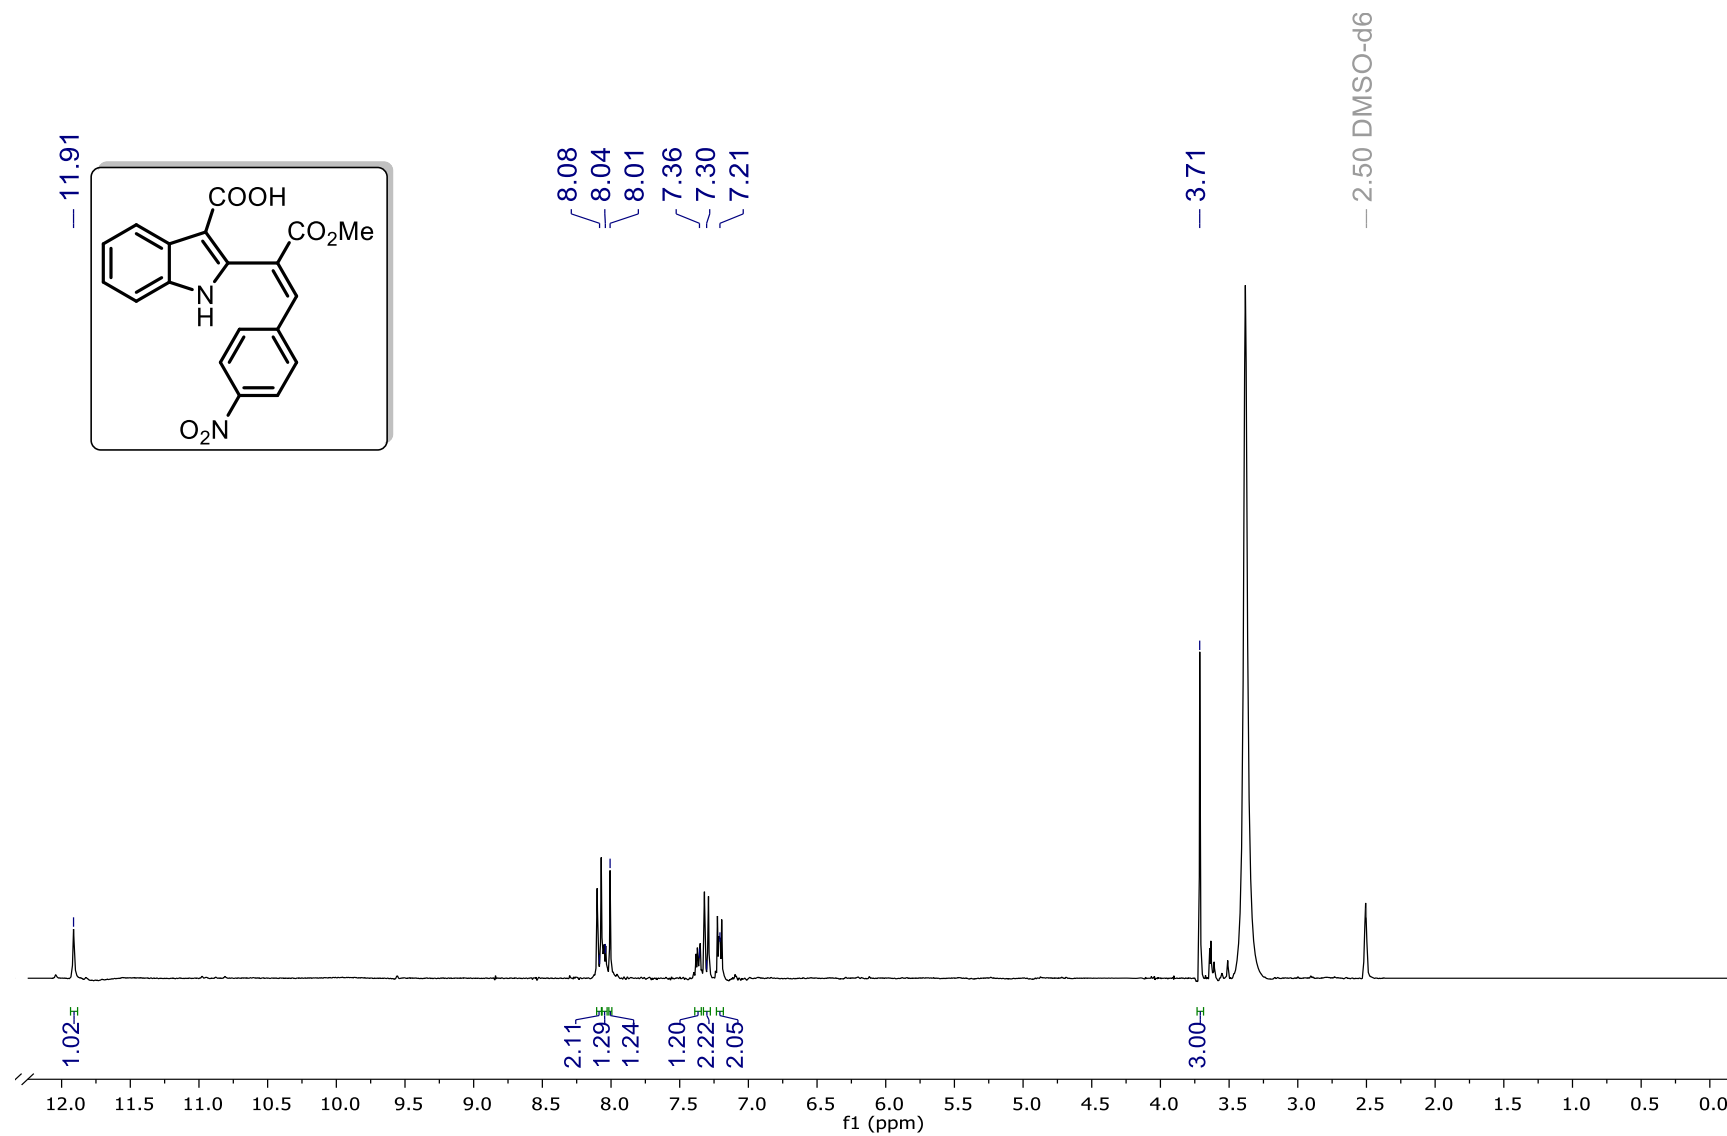

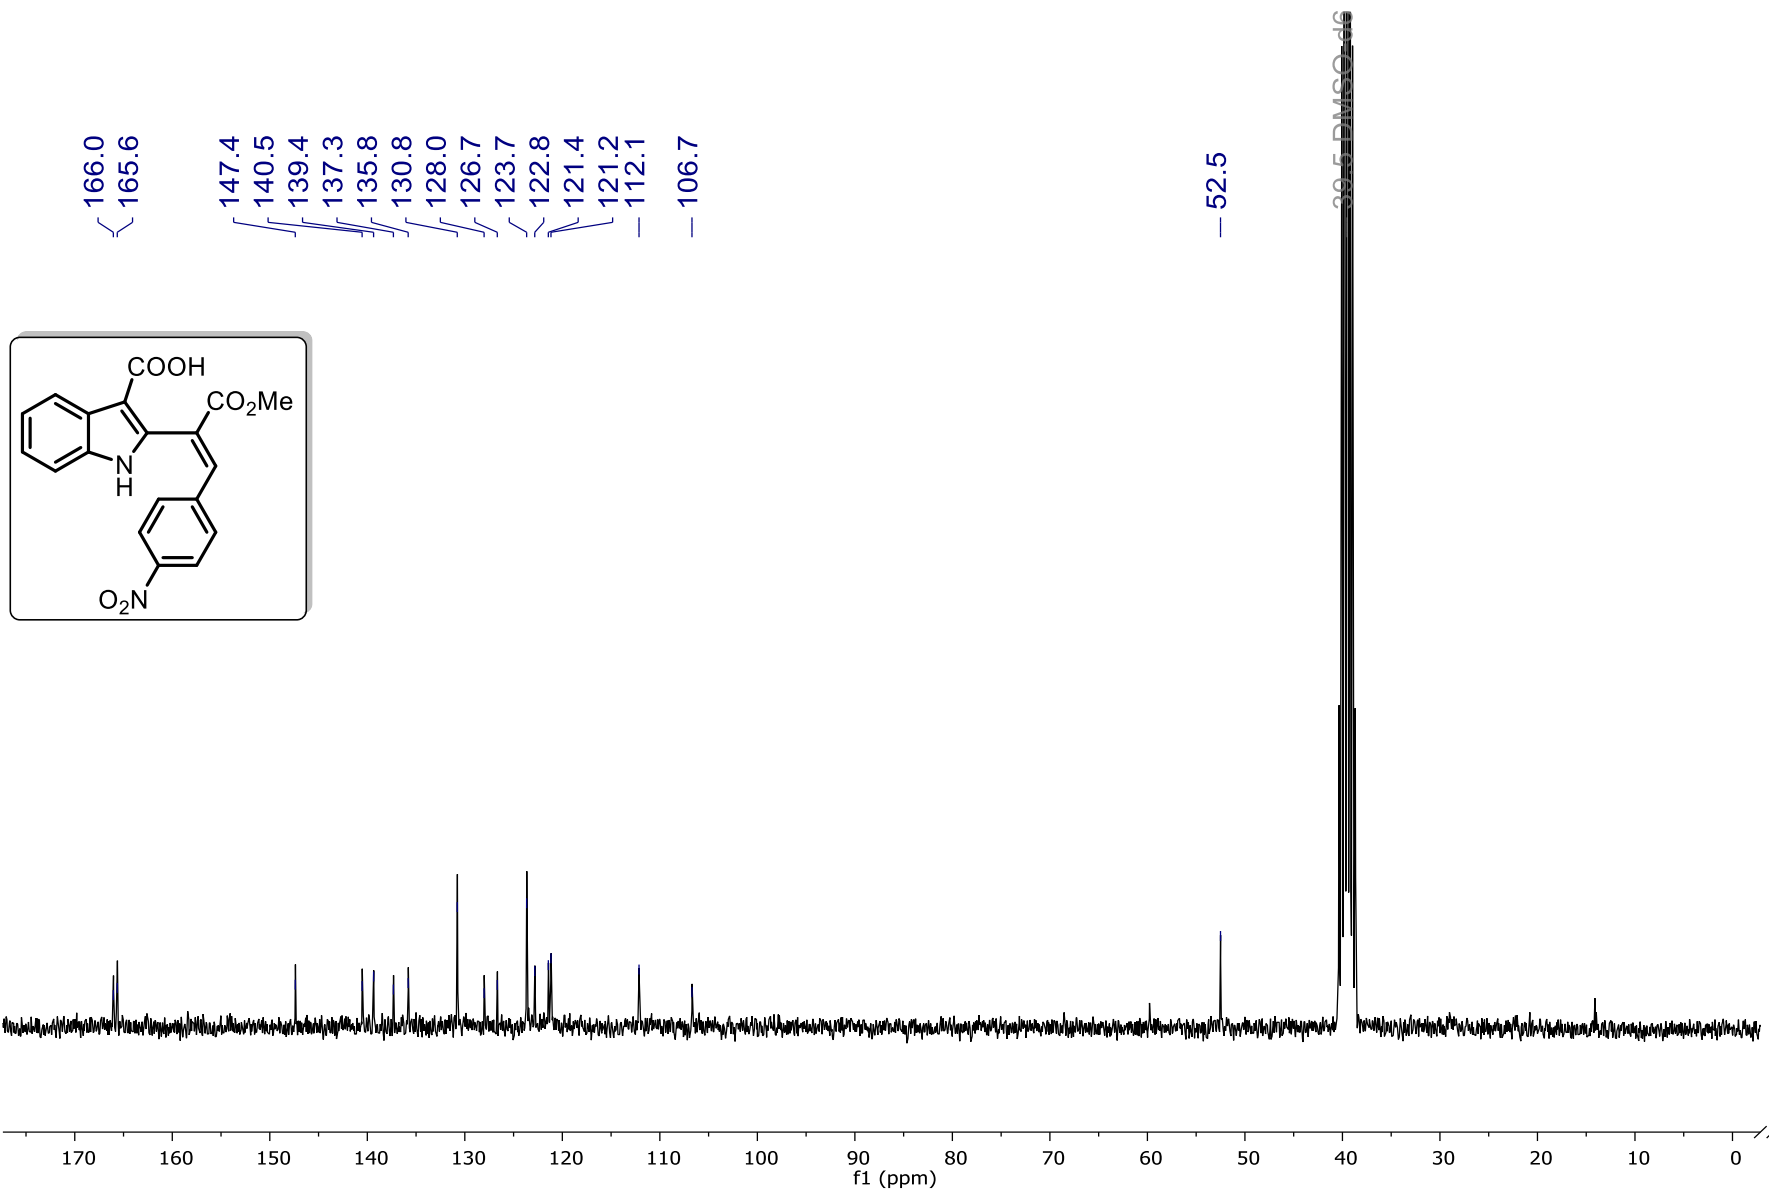

# <sup>1</sup>H and <sup>13</sup>C NMR Spectra of 3g

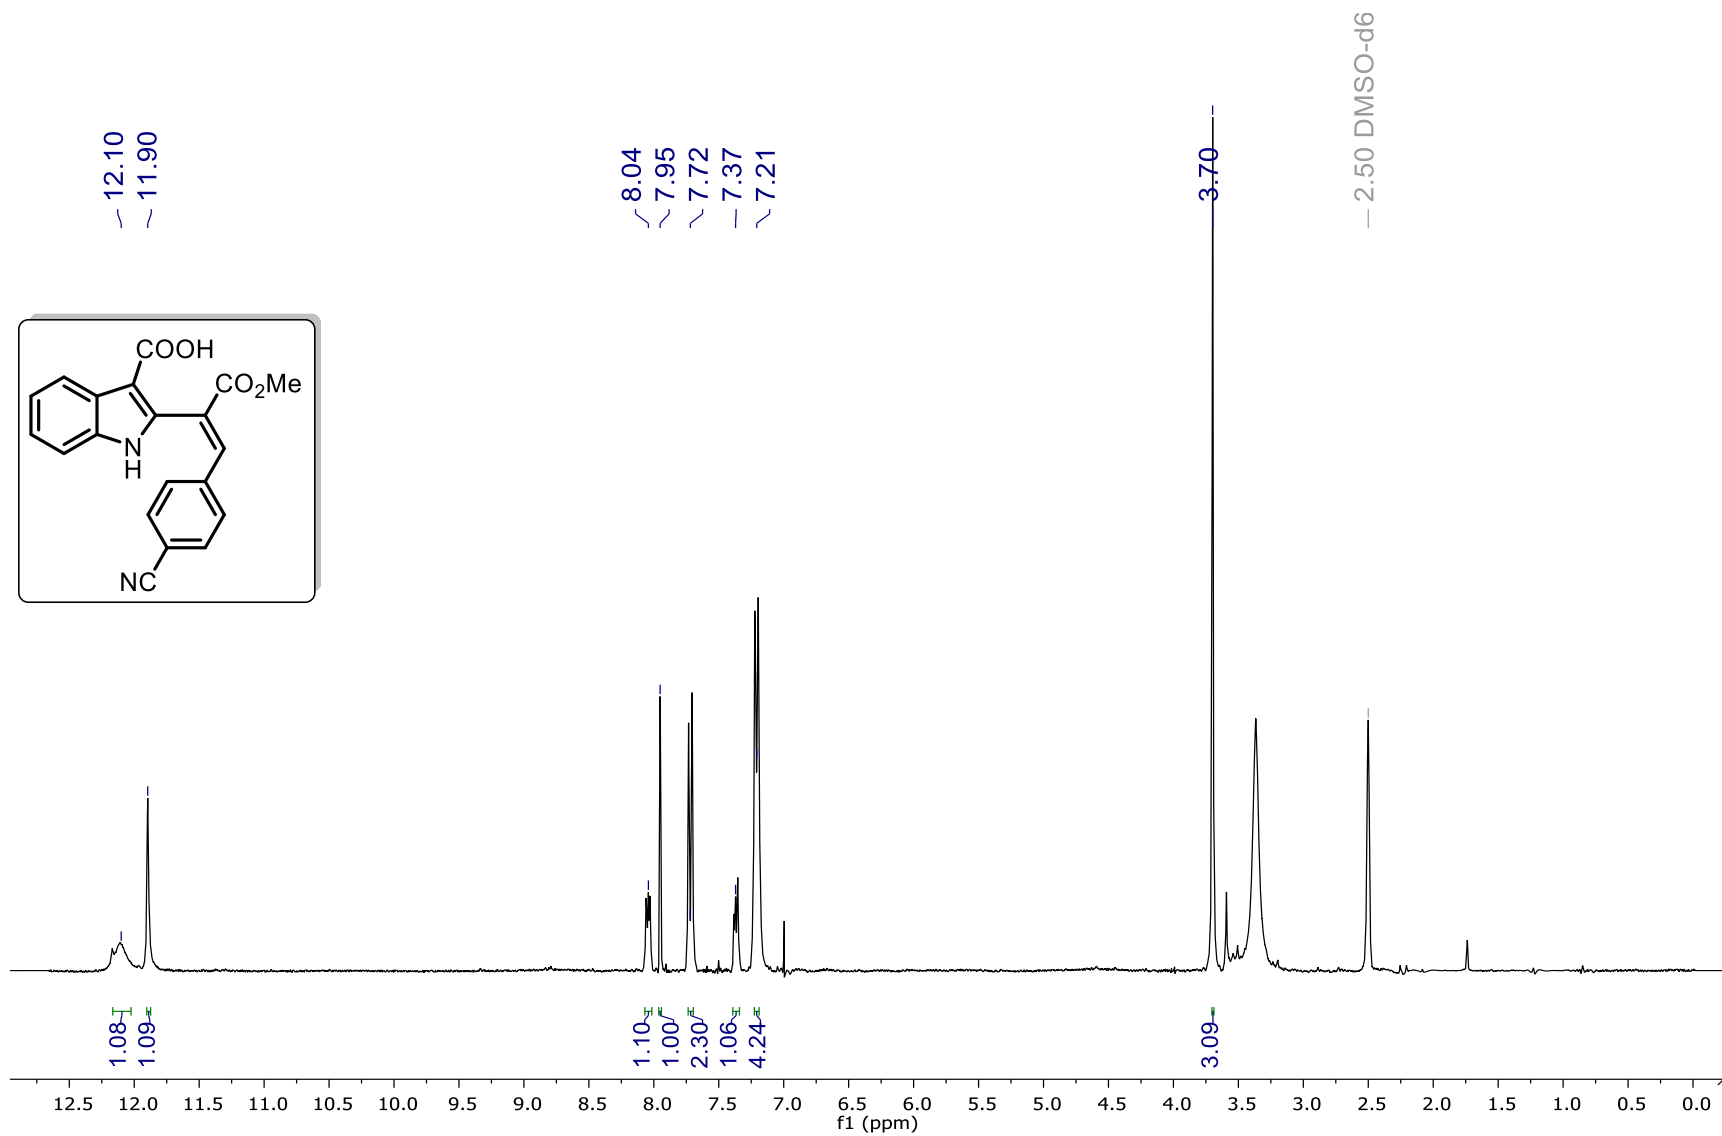

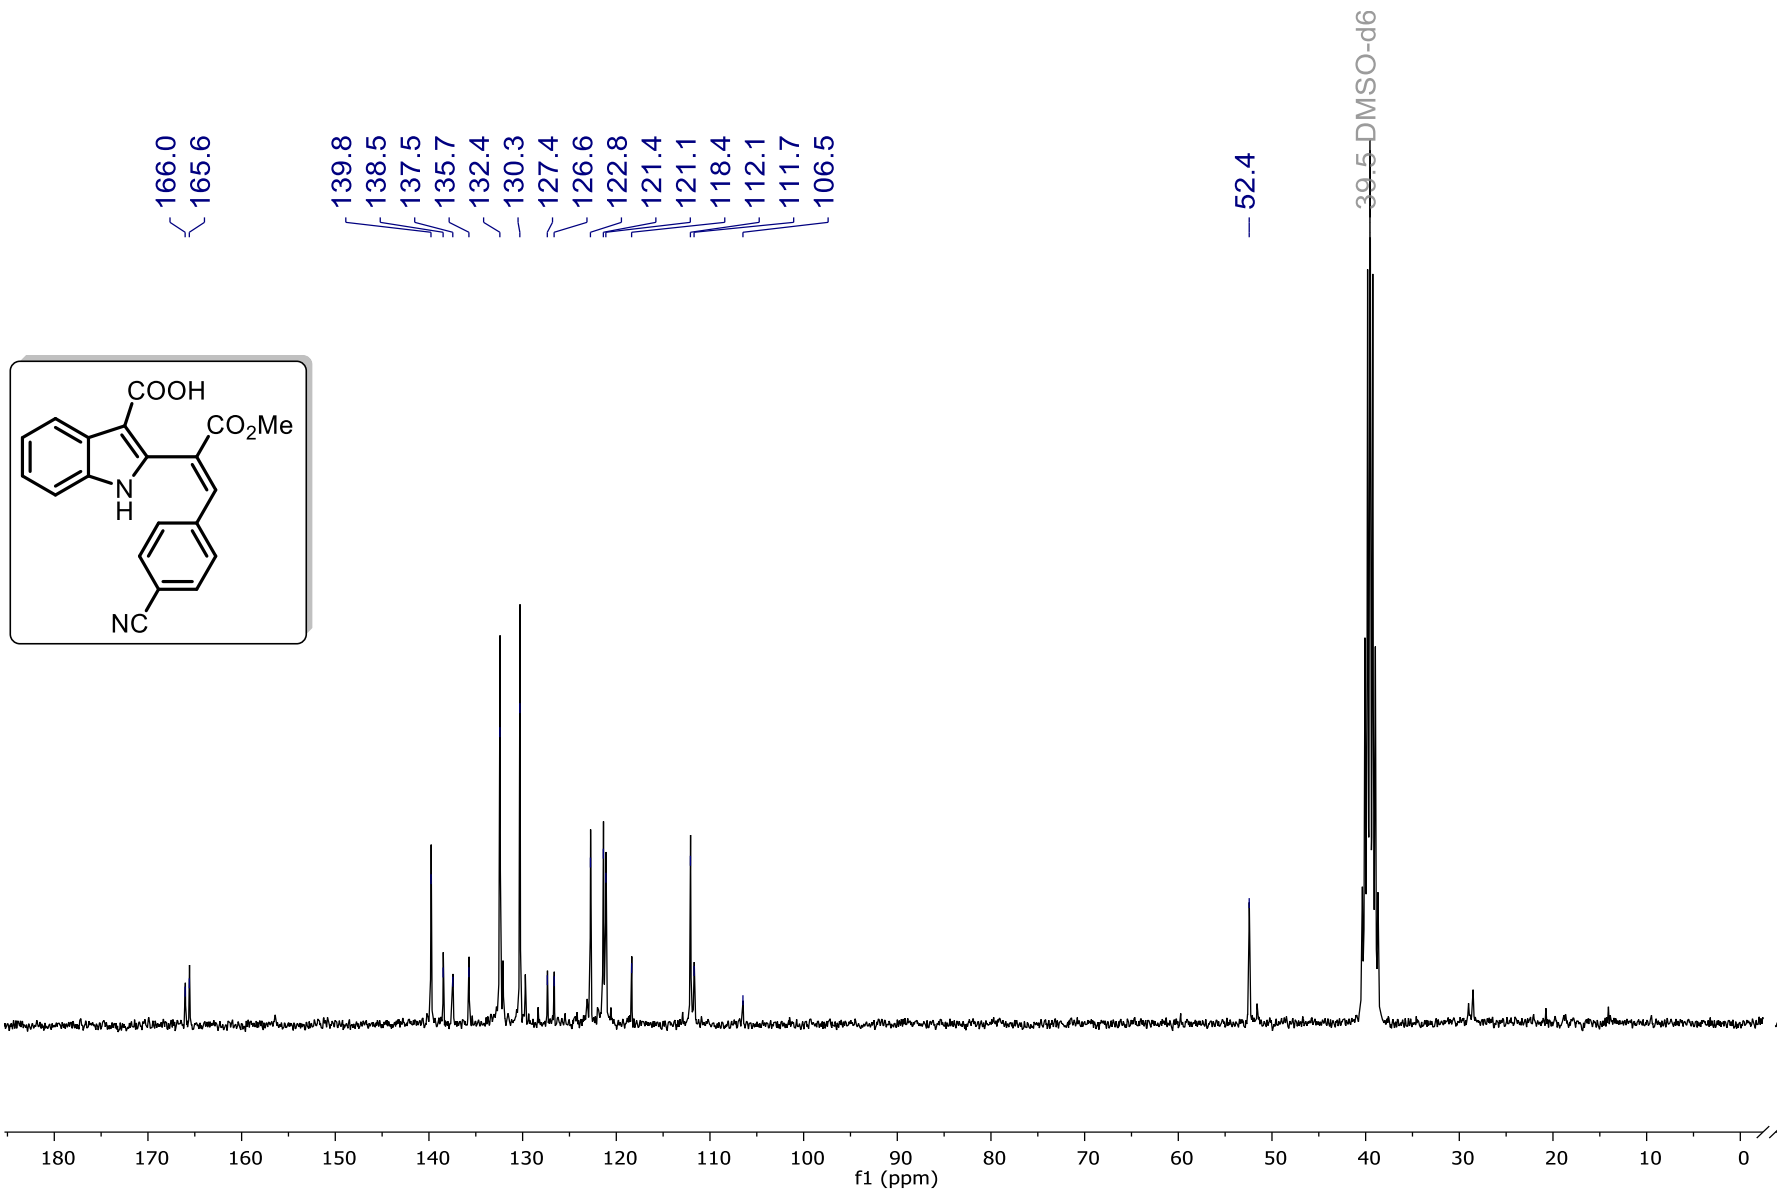

# <sup>1</sup>H and <sup>13</sup>C NMR Spectra of 3h

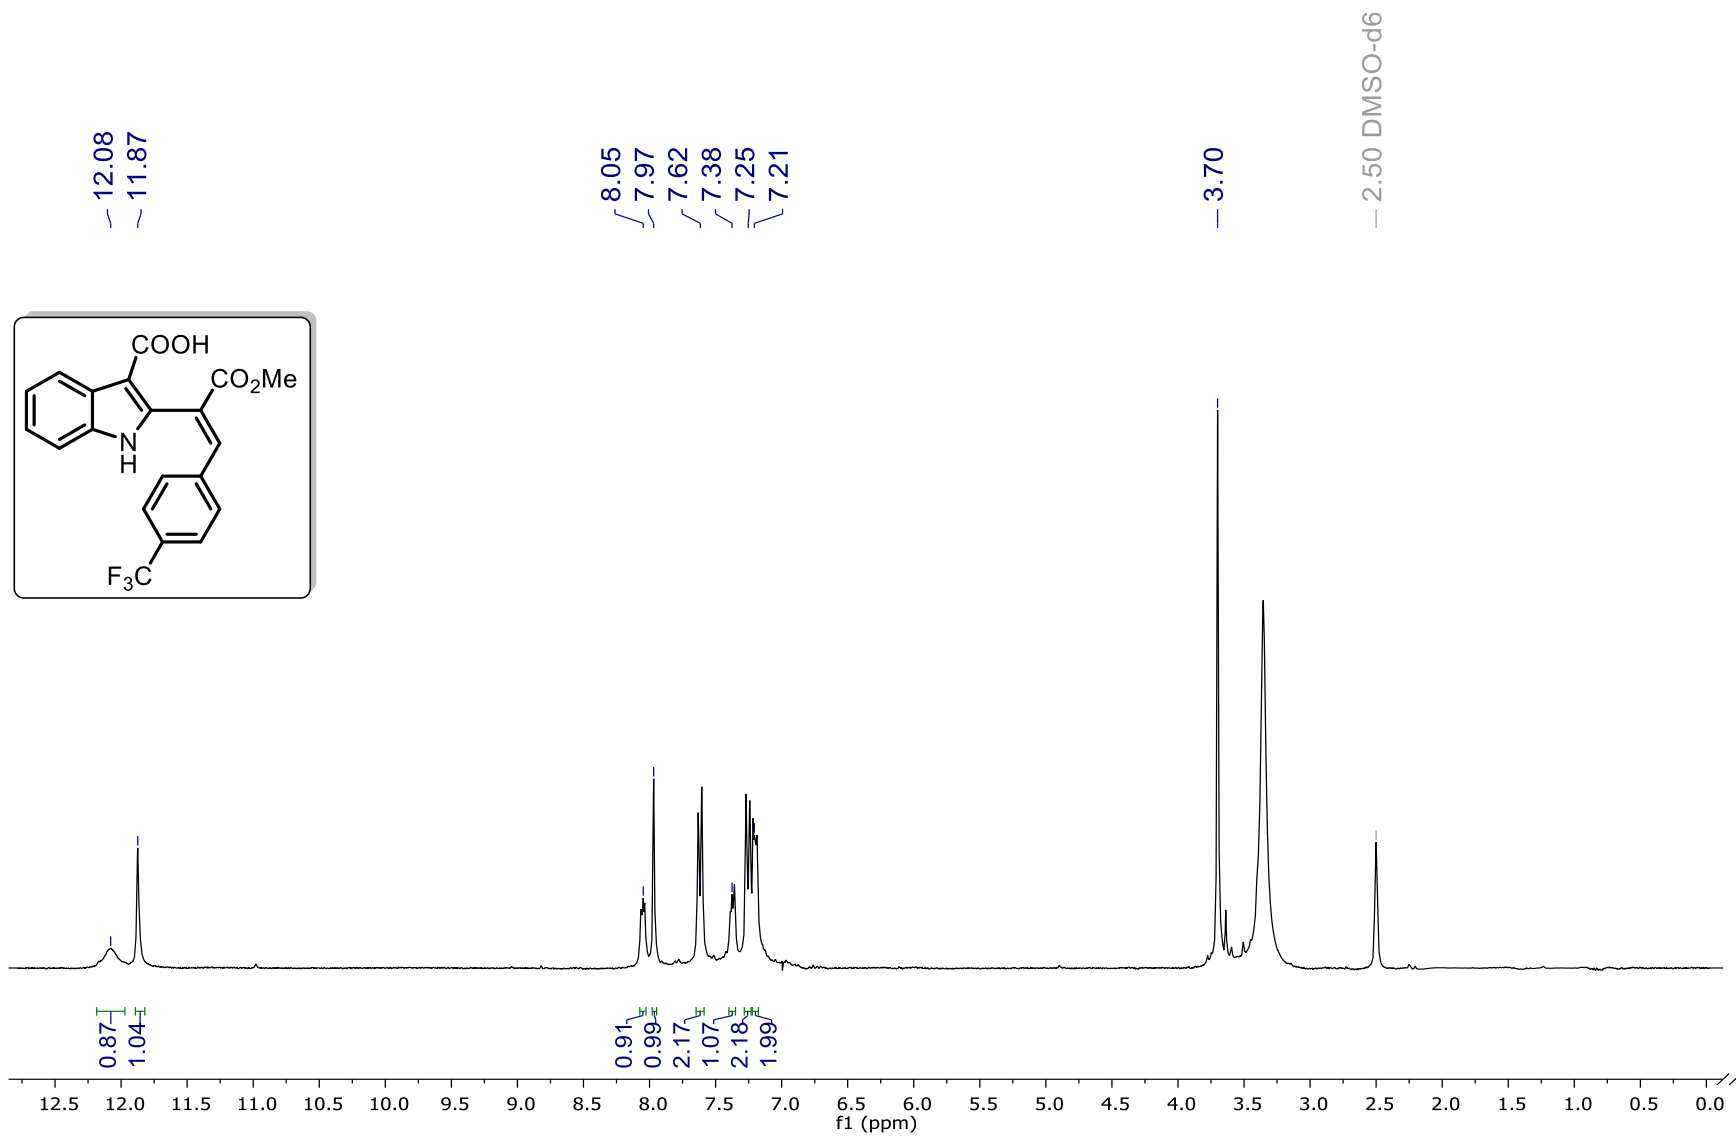

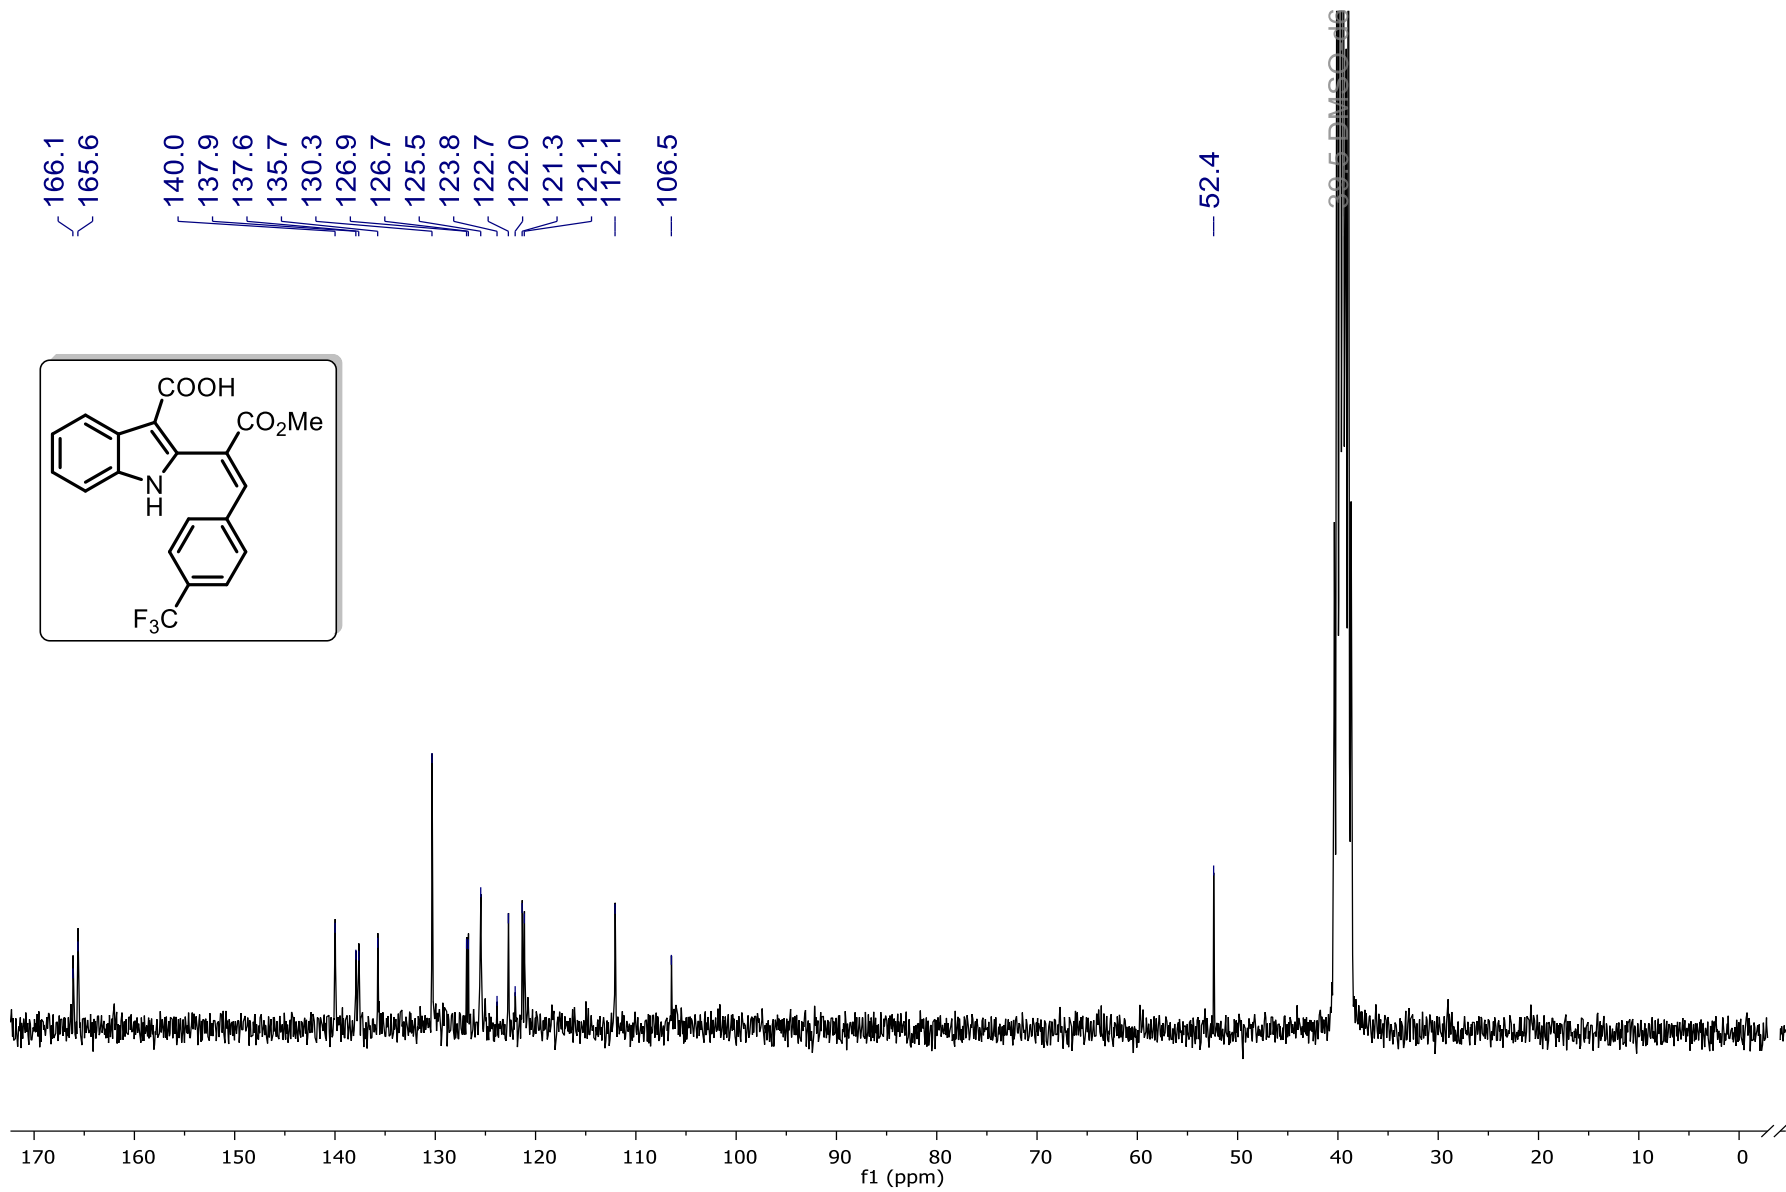

# <sup>1</sup>H and <sup>13</sup>C NMR Spectra of 3i

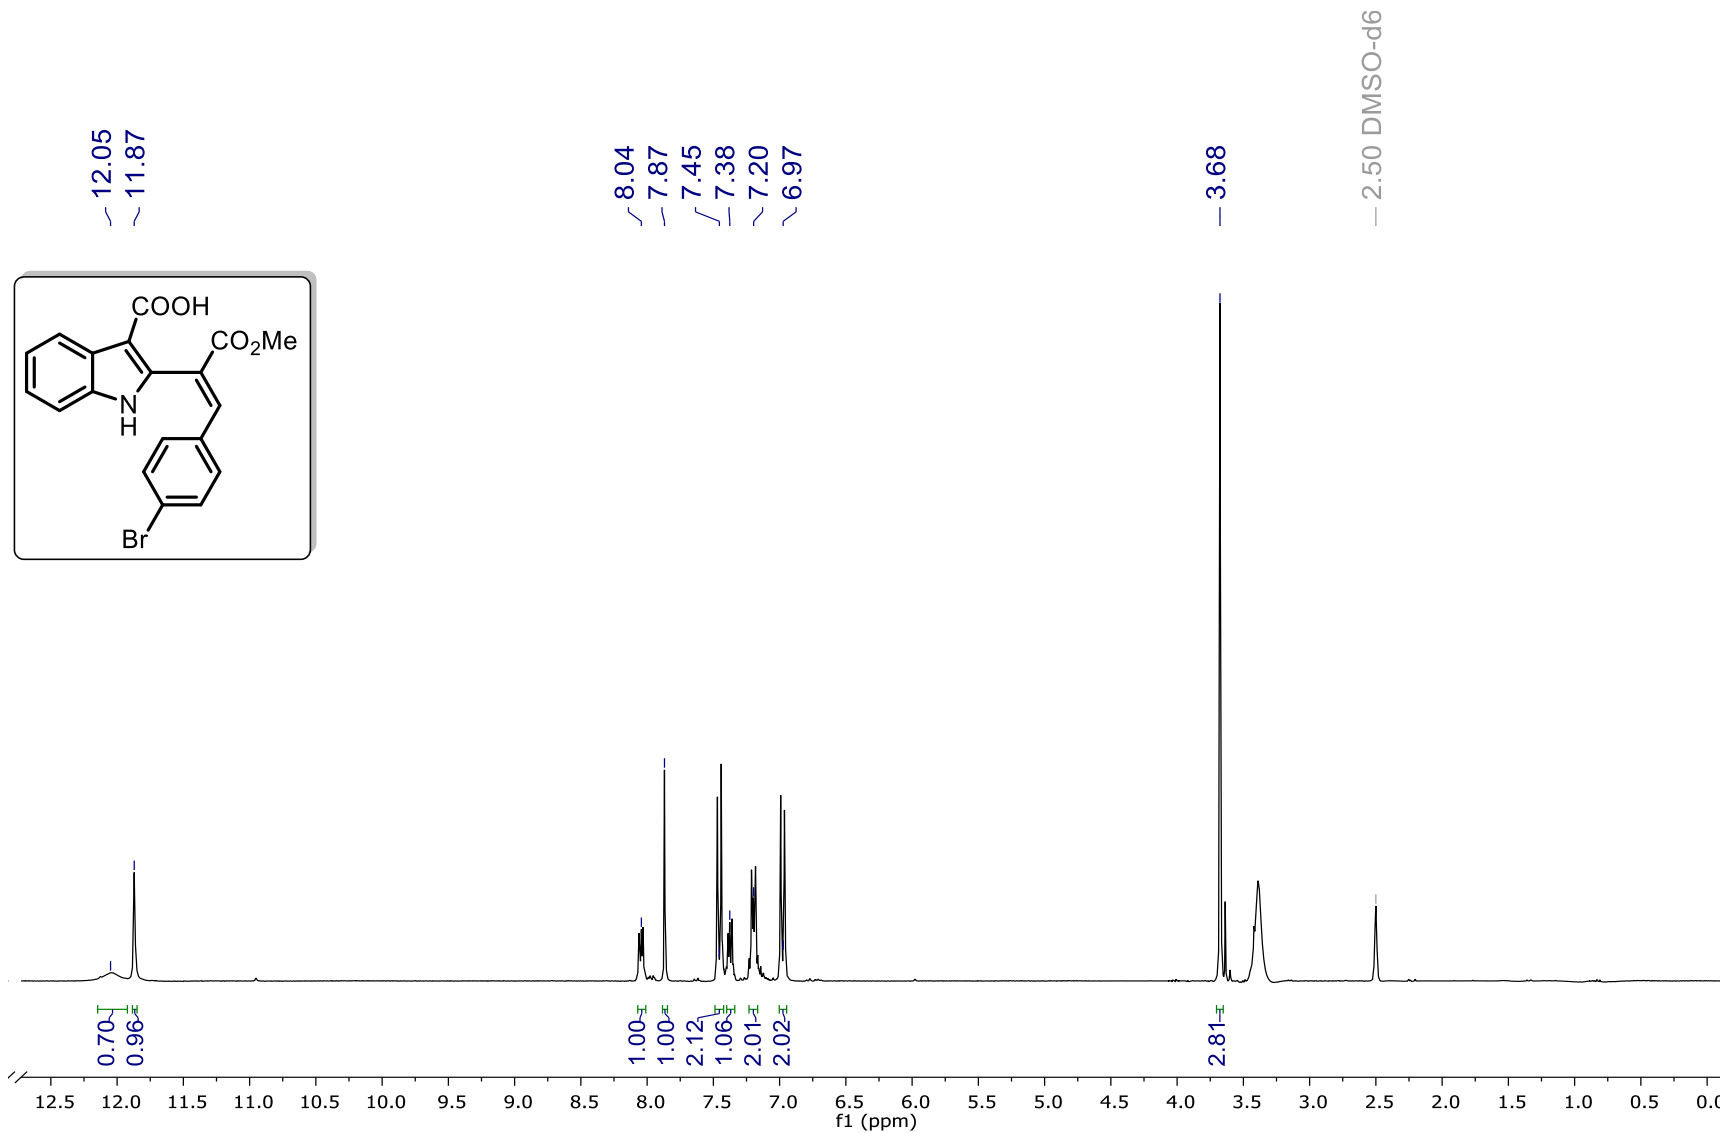



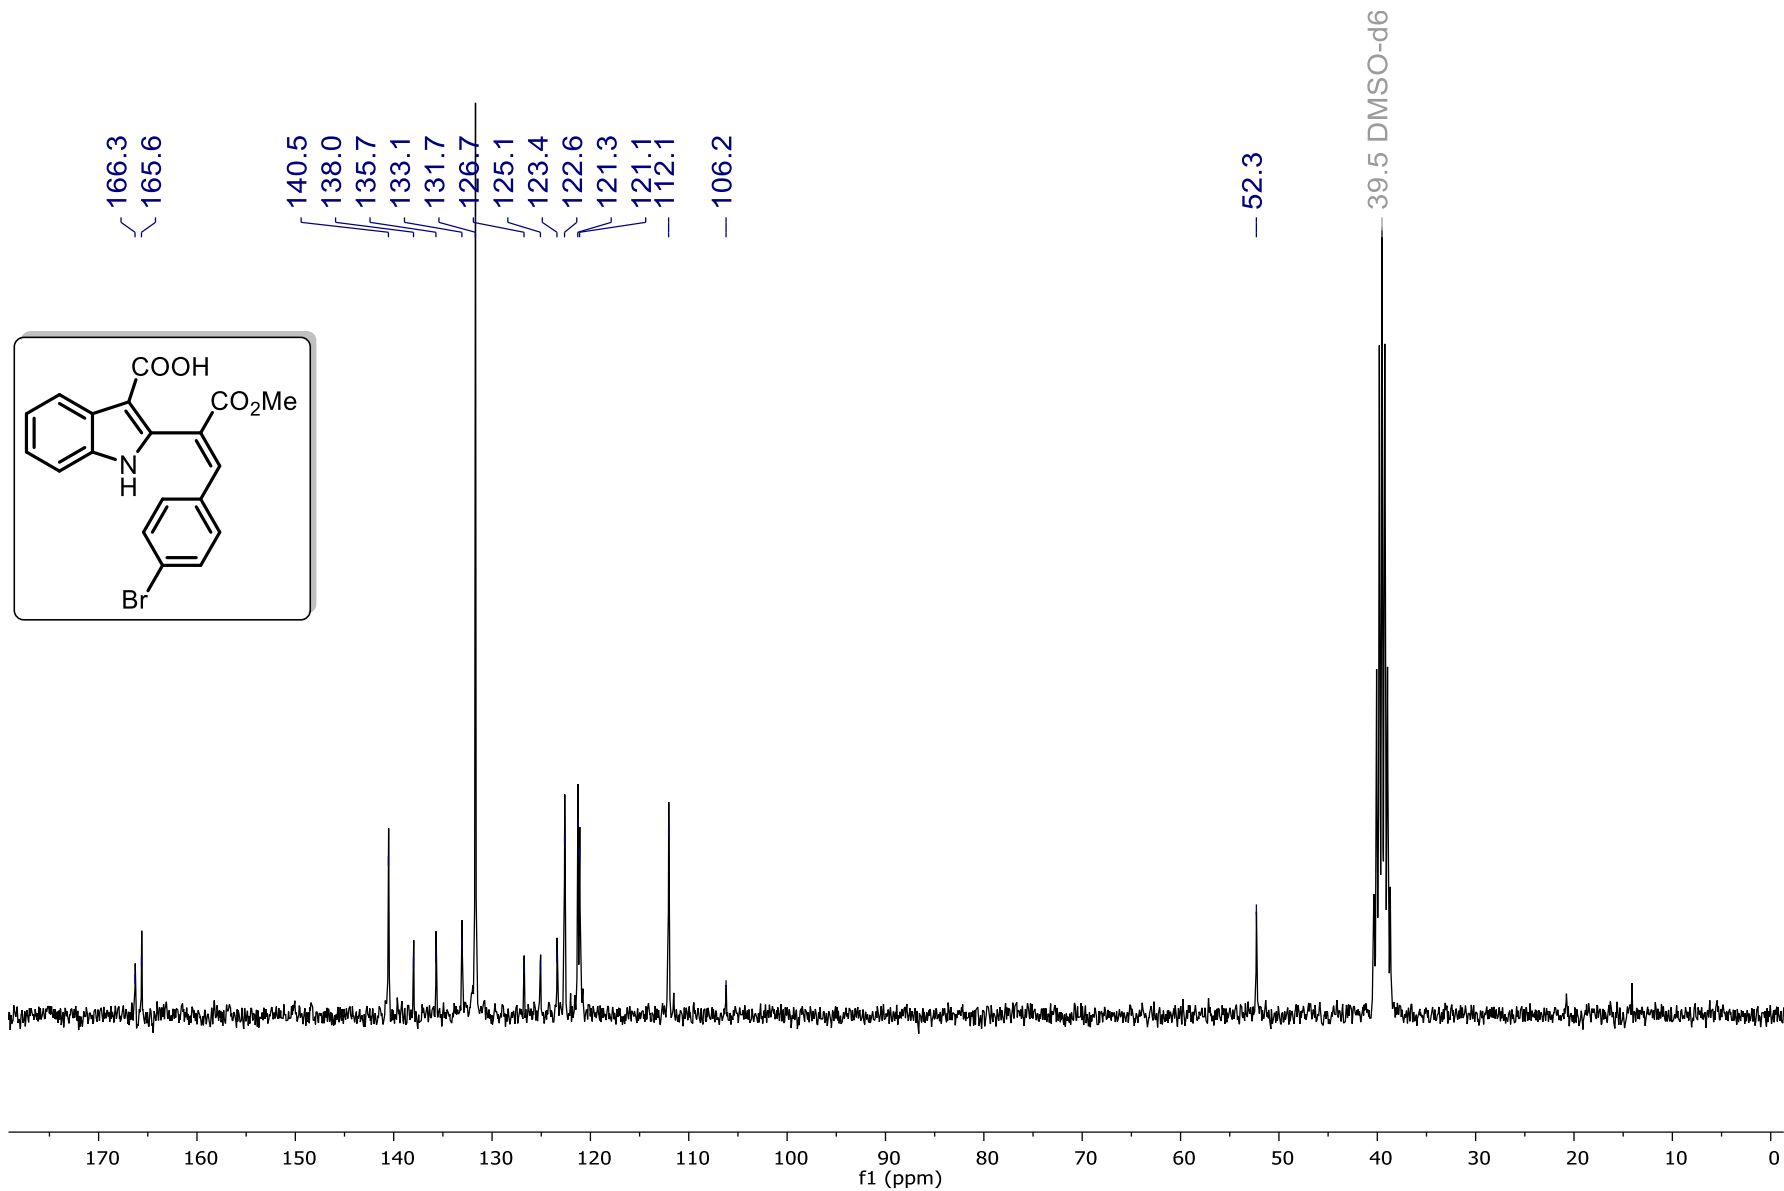

# <sup>1</sup>H and <sup>13</sup>C NMR Spectra of 3j

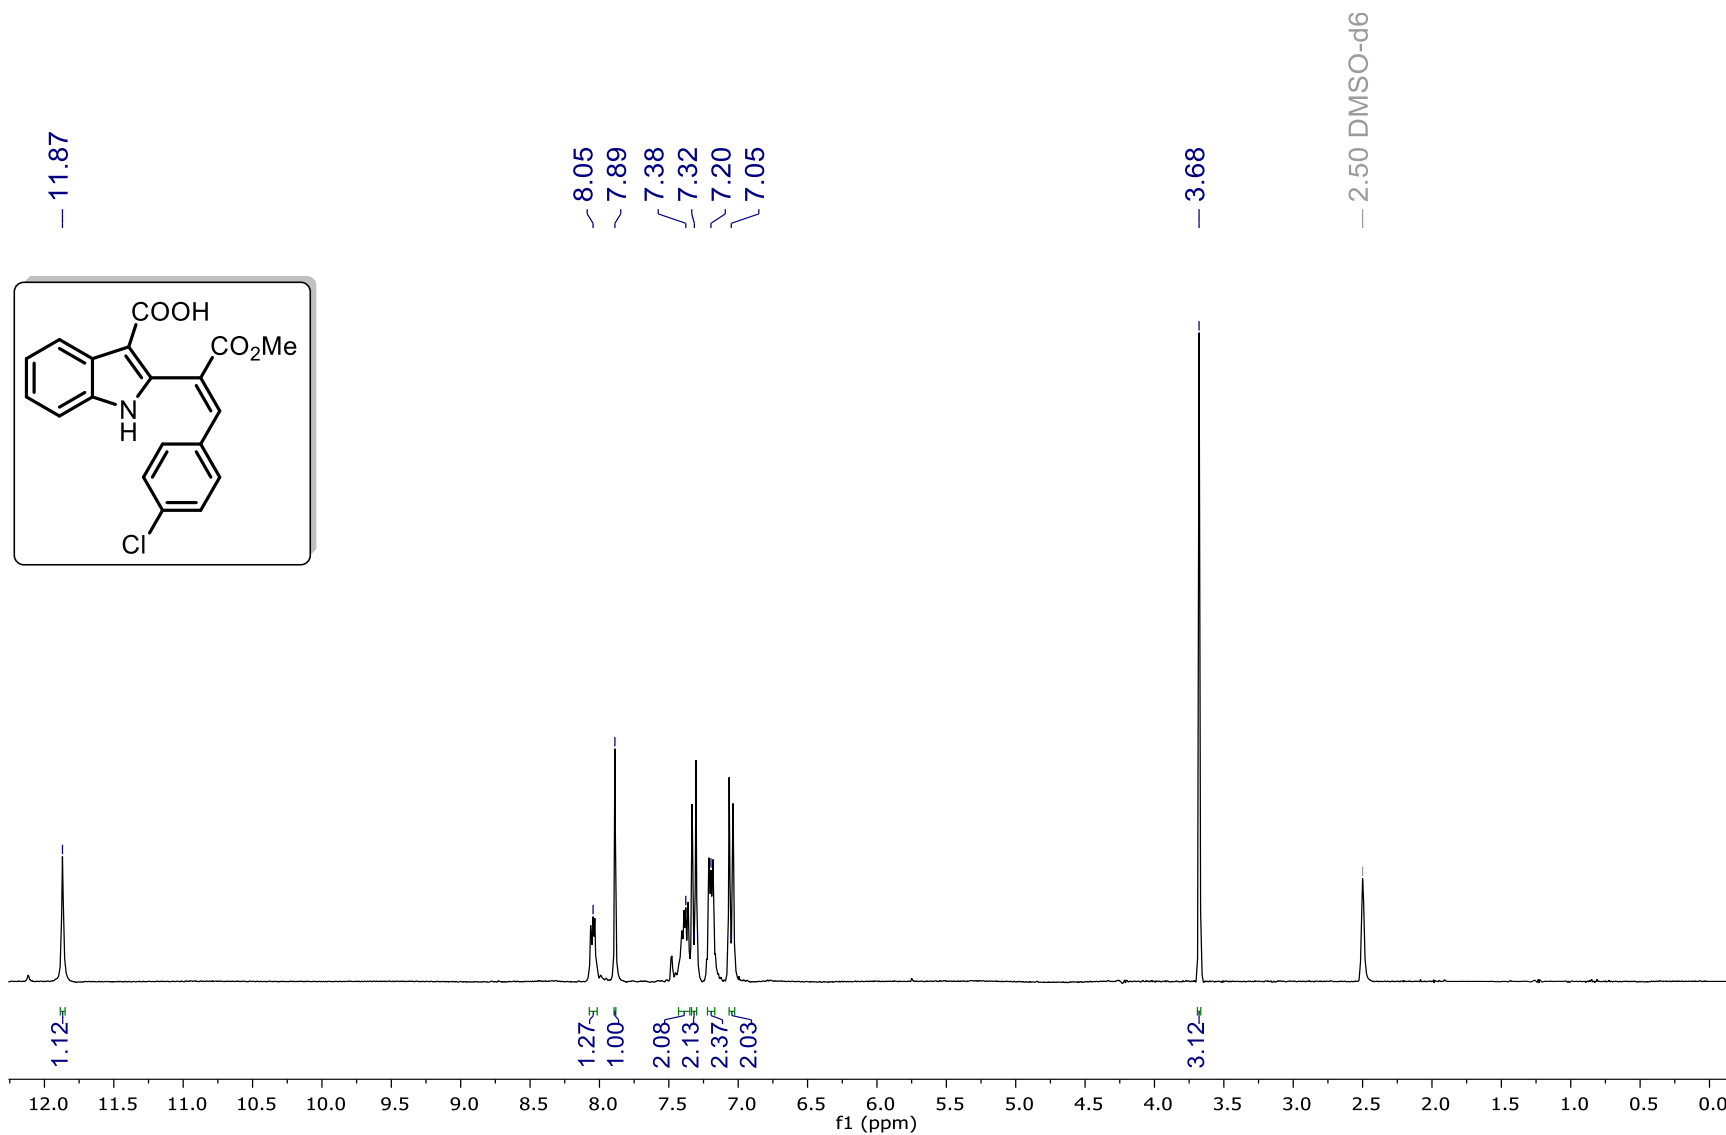

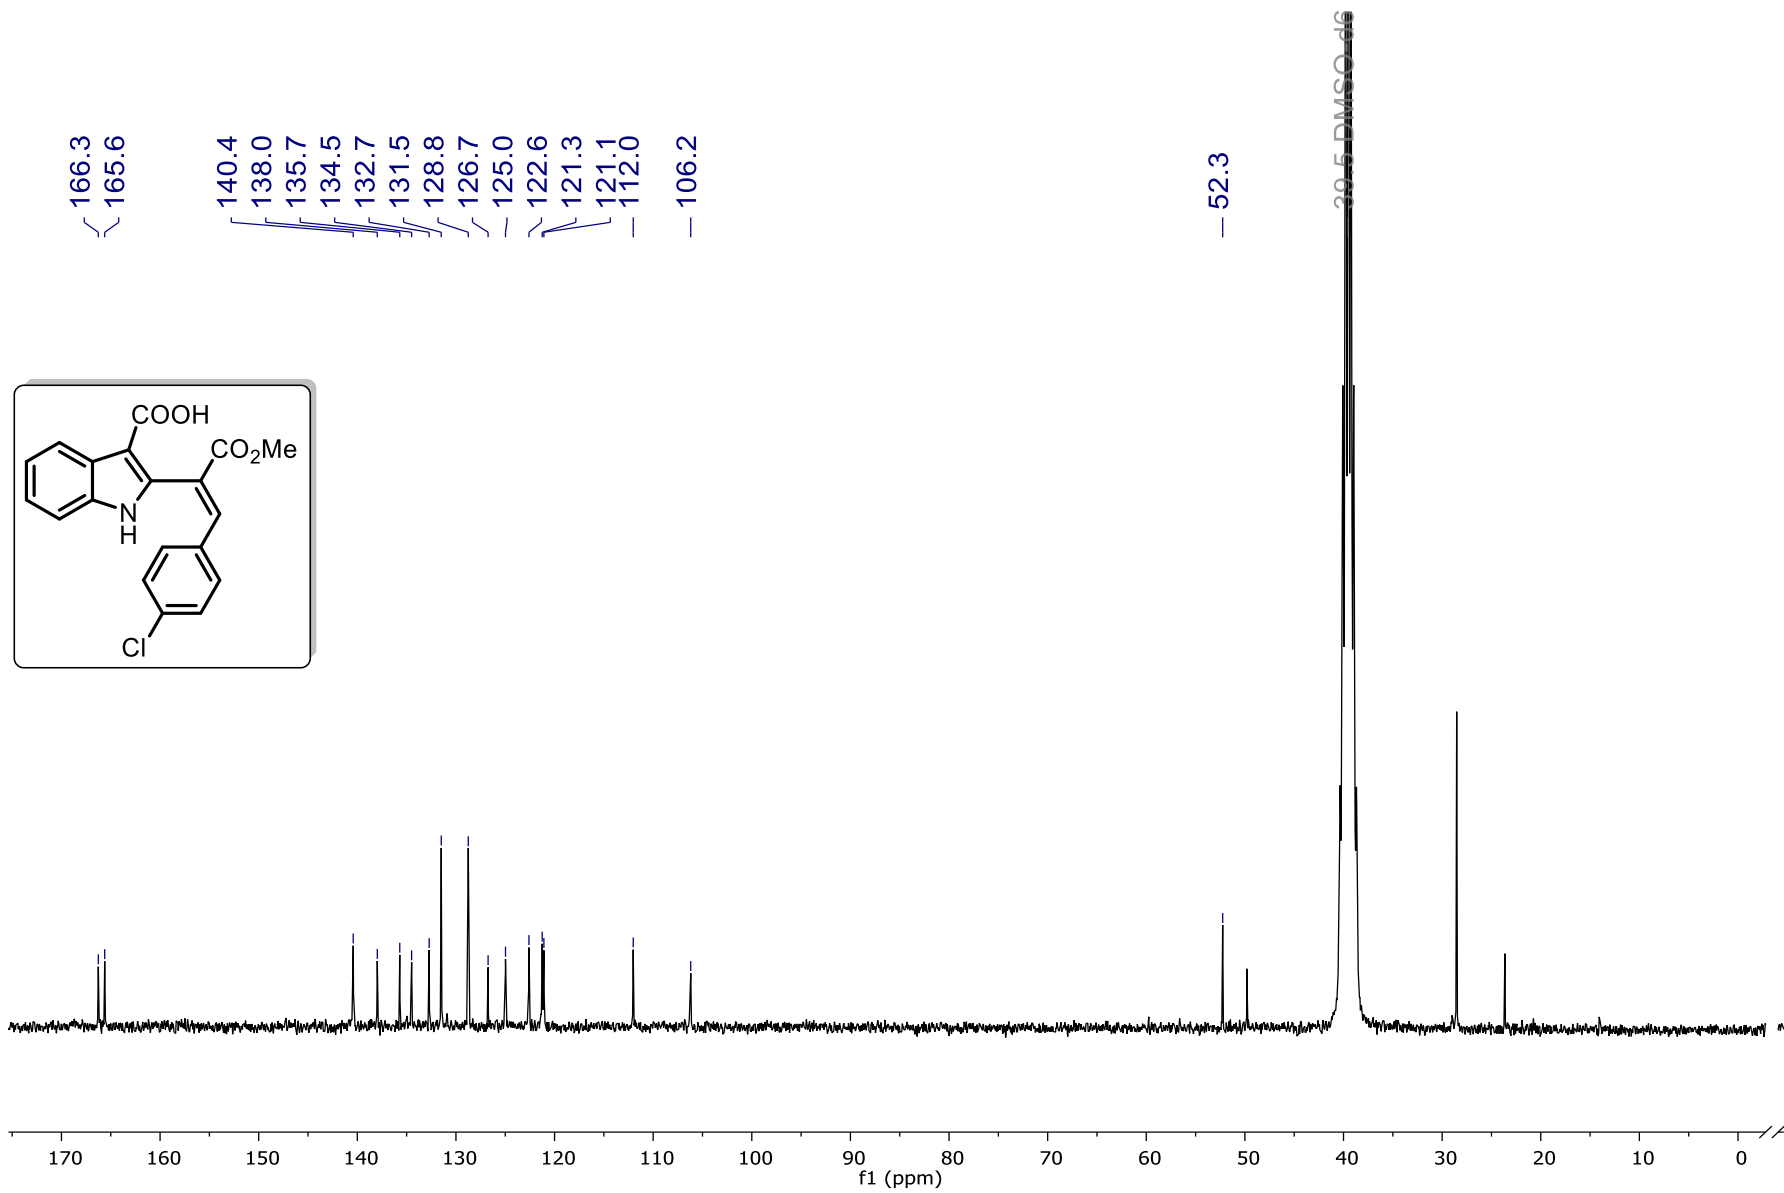

# <sup>1</sup>H and <sup>13</sup>C NMR Spectra of 3k

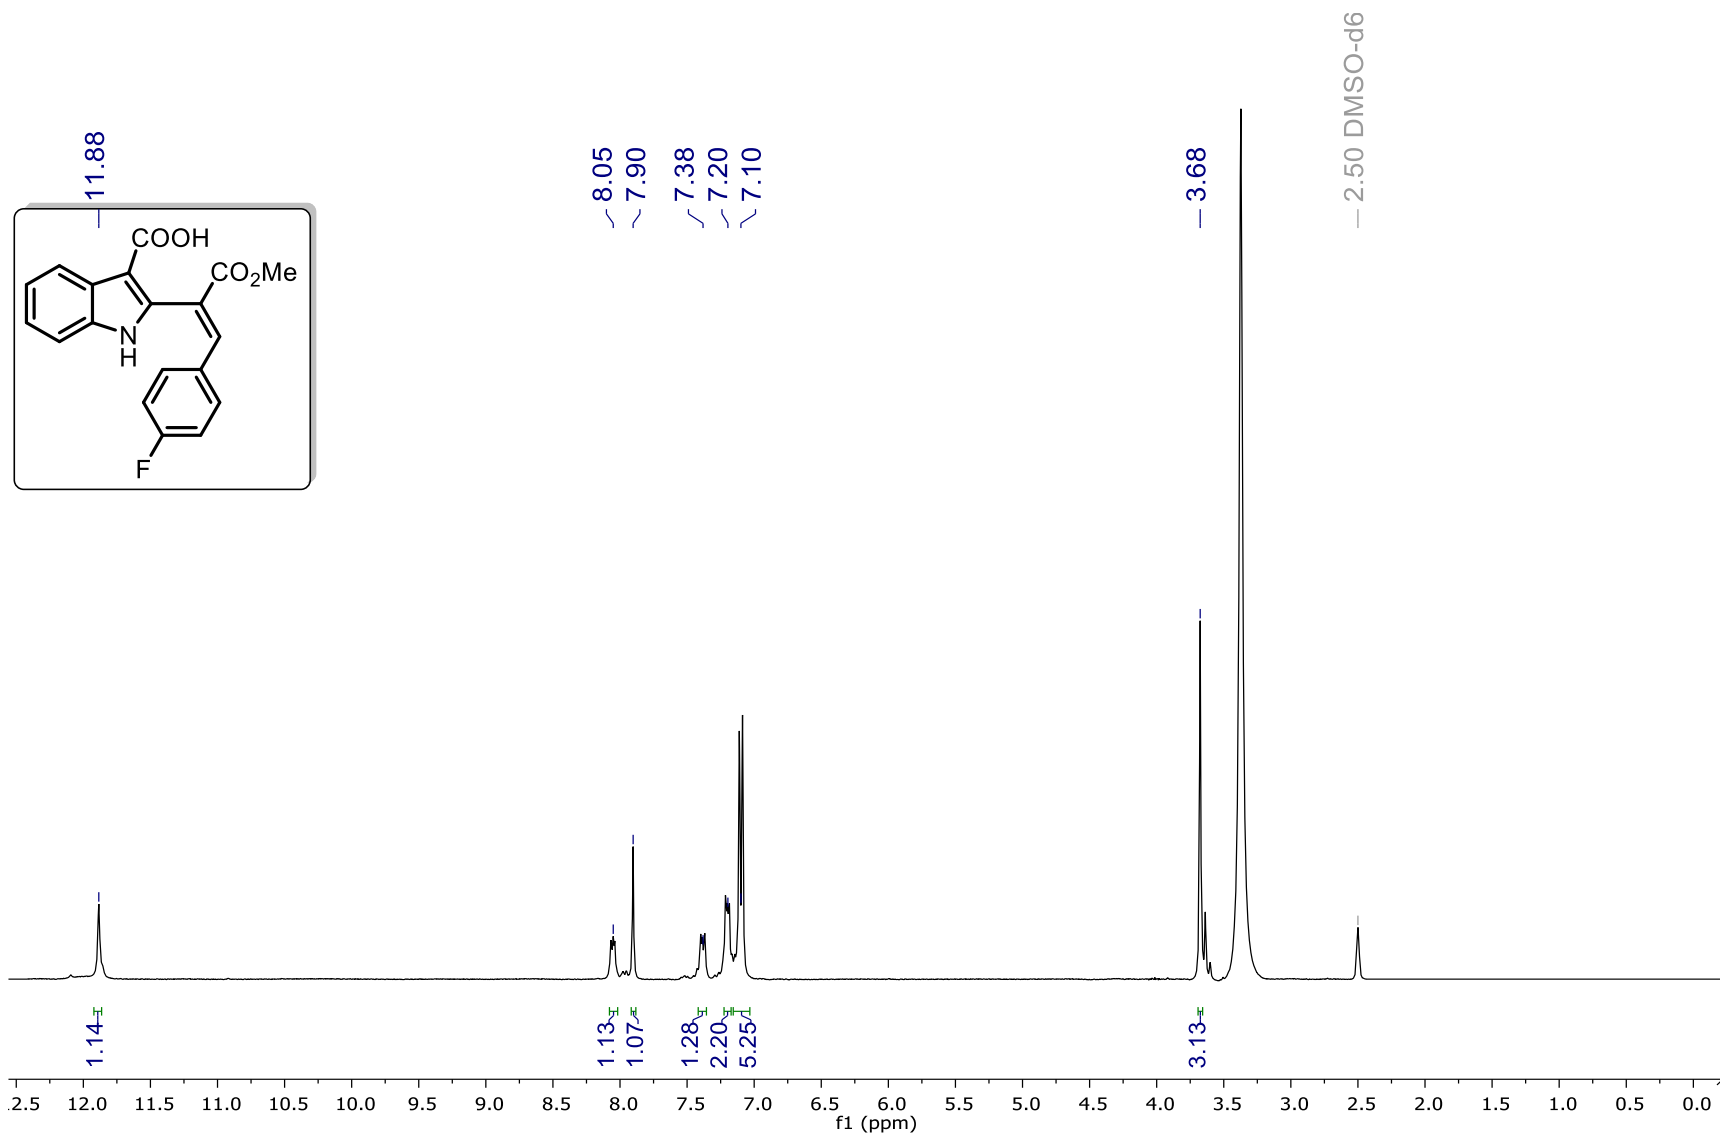

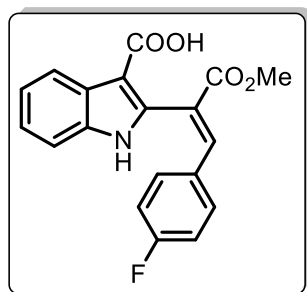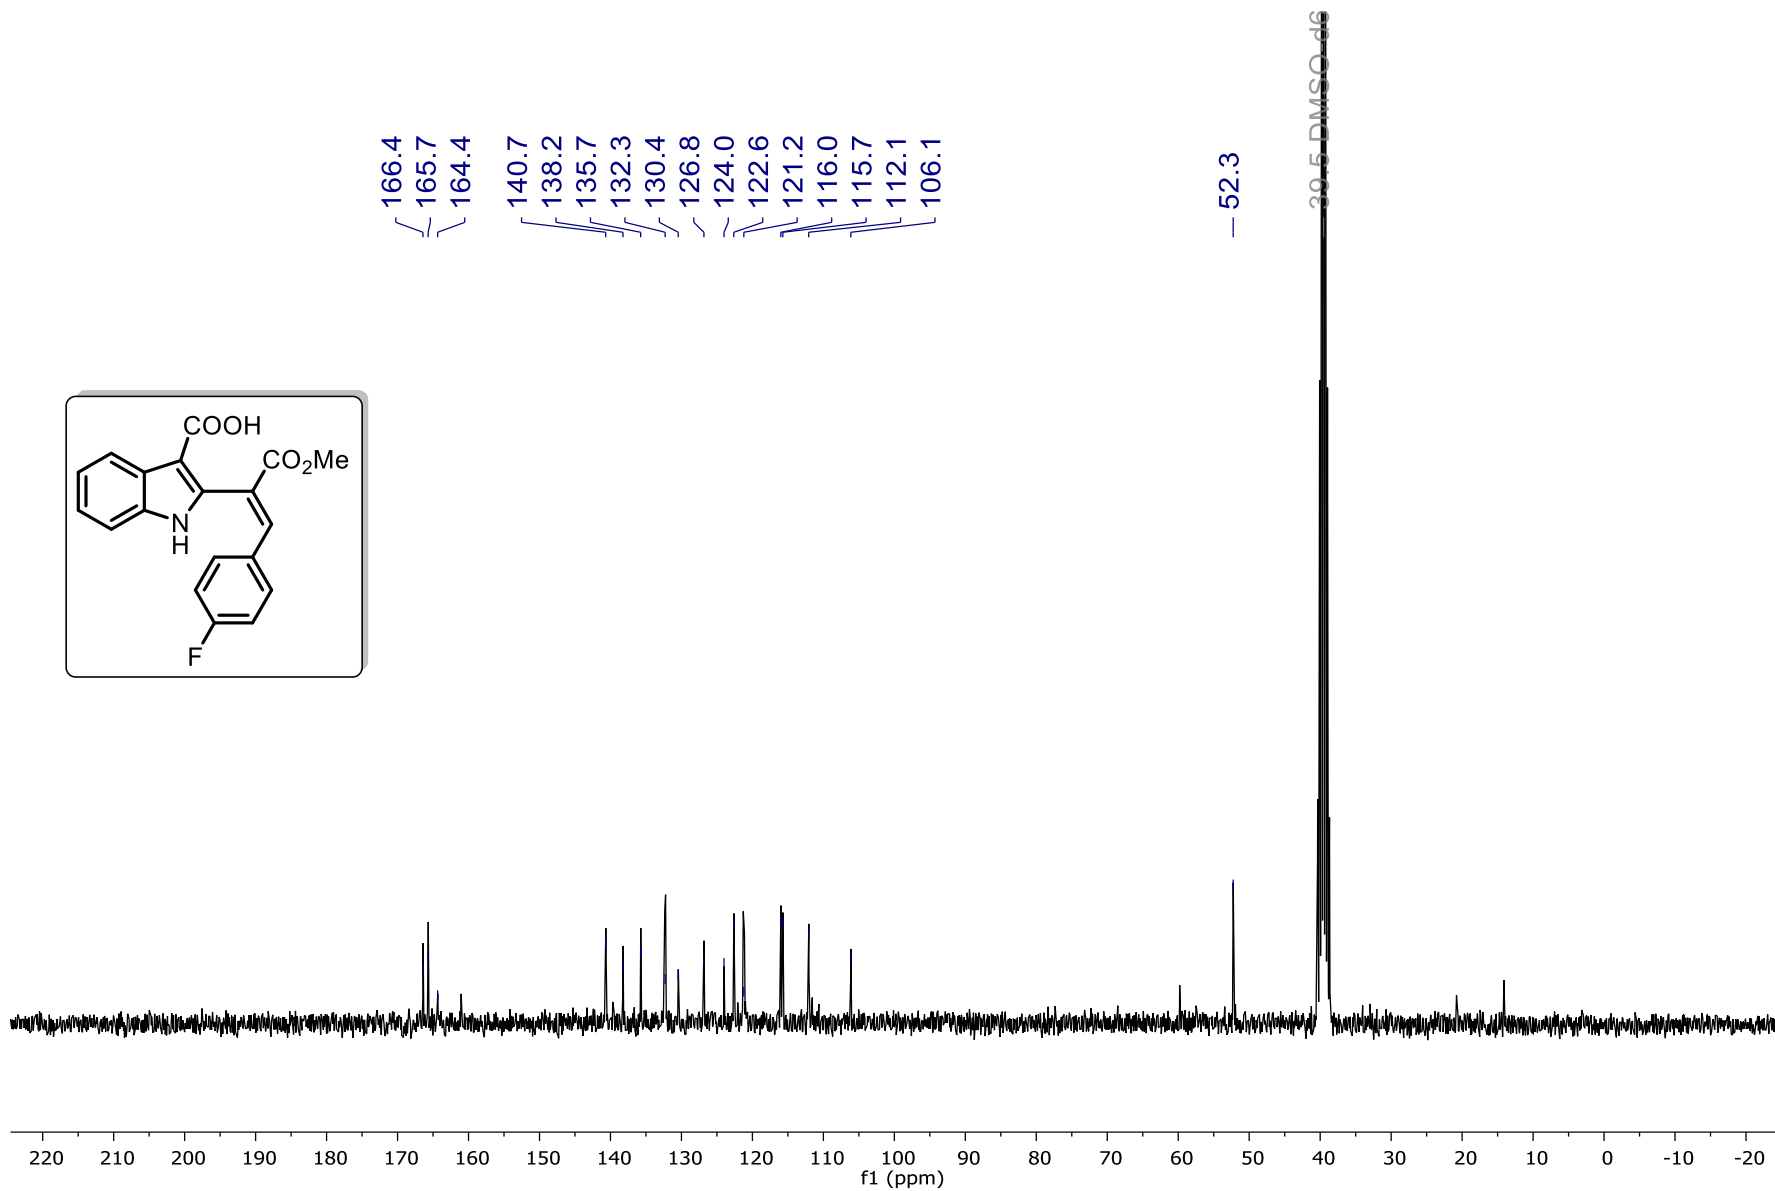

## 9. High-resolution mass spectroscopy reports

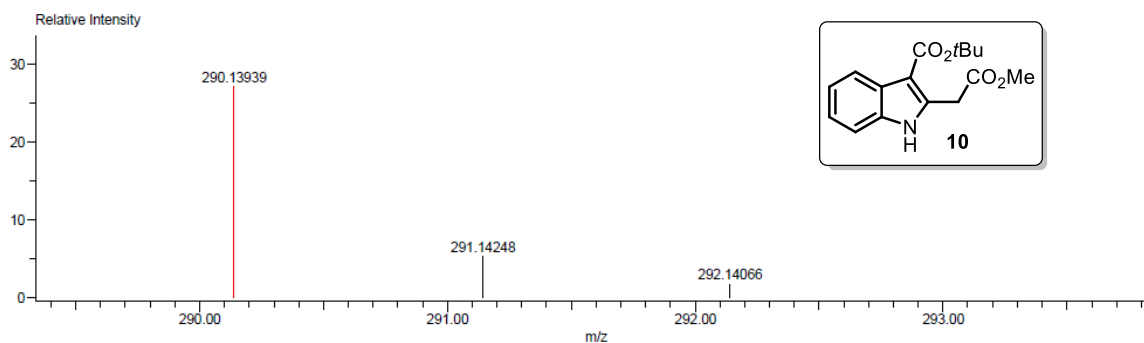

| Mass      | Intensity | Calc. Mass | Mass Difference (mmu) | Mass Difference (ppm) | Possible Formula                                                                                                     | Unsaturation Number |
|-----------|-----------|------------|-----------------------|-----------------------|----------------------------------------------------------------------------------------------------------------------|---------------------|
| 290.13939 | 111249.63 | 290.13923  | 0.16                  | 0.56                  | <sup>12</sup> C <sub>16</sub> <sup>1</sup> H <sub>20</sub> <sup>14</sup> N <sub>1</sub> <sup>16</sup> O <sub>4</sub> | 7.5                 |

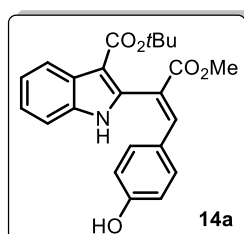

|   |               |                 |      |    |    |   |   |
|---|---------------|-----------------|------|----|----|---|---|
|   | Observed m/z  | Int%            |      |    |    |   |   |
|   | 304.0623      | 81.81           |      |    |    |   |   |
|   | Estimated m/z | Err [ppm / mmu] | U.S. | C  | H  | N | O |
| 1 | 304.0610      | +4.3 / +1.3     | 14.5 | 18 | 10 | 1 | 4 |
|   | Observed m/z  | Int%            |      |    |    |   |   |
|   | 337.0951      | 100.00          |      |    |    |   |   |
|   | Estimated m/z | Err [ppm / mmu] | U.S. | C  | H  | N | O |
| 2 | 337.0950      | +0.2 / +0.1     | 13.0 | 19 | 15 | 1 | 5 |
|   | Observed m/z  | Int%            |      |    |    |   |   |
|   | 393.1561      | 19.79           |      |    |    |   |   |
|   | Estimated m/z | Err [ppm / mmu] | U.S. | C  | H  | N | O |
| 3 | 393.1576      | -3.9 / -1.5     | 13.0 | 23 | 23 | 1 | 5 |

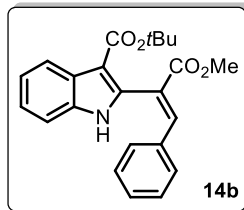

|               |                 |      |    |    |   |
|---------------|-----------------|------|----|----|---|
| Observed m/z  | Int%            |      |    |    |   |
| 377.1640      | 99.01           |      |    |    |   |
| Estimated m/z | Err [ppm / mmu] | U.S. | C  | H  | N |
| 1 377.1627    | +3.4 / +1.3     | 13.0 | 23 | 23 | 1 |
|               |                 |      |    |    | O |
|               |                 |      |    |    | 4 |

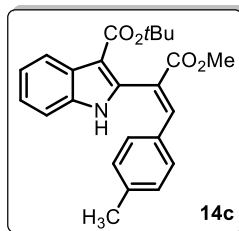

|               |                 |      |    |    |   |
|---------------|-----------------|------|----|----|---|
| Observed m/z  | Int%            |      |    |    |   |
| 391.1794      | 37.27           |      |    |    |   |
| Estimated m/z | Err [ppm / mmu] | U.S. | C  | H  | N |
| 1 391.1784    | +2.7 / +1.0     | 13.0 | 24 | 25 | 1 |
|               |                 |      |    |    | O |
|               |                 |      |    |    | 4 |

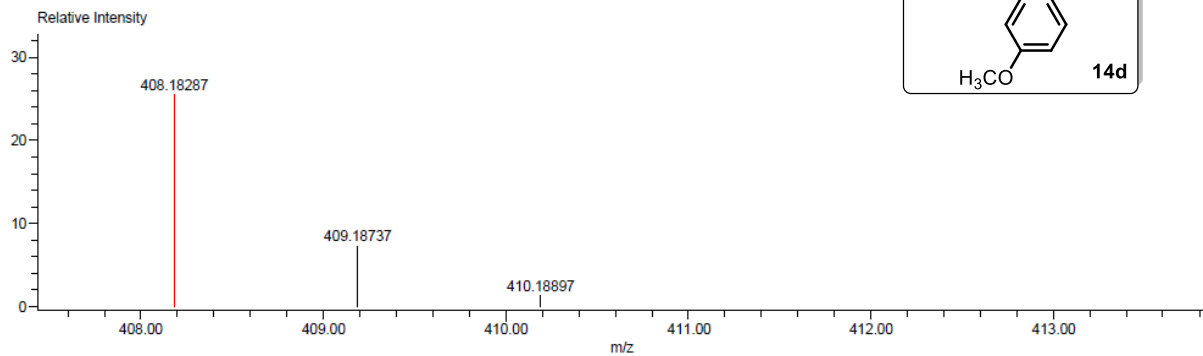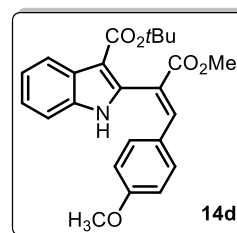

| Mass      | Intensity | Calc. Mass | Mass Difference (mmu) | Mass Difference (ppm) | Possible Formula                                                                                                     | Unsaturation Number |
|-----------|-----------|------------|-----------------------|-----------------------|----------------------------------------------------------------------------------------------------------------------|---------------------|
| 408.18287 | 354744.33 | 408.18110  | 1.77                  | 4.35                  | <sup>12</sup> C <sub>24</sub> <sup>1</sup> H <sub>26</sub> <sup>14</sup> N <sub>1</sub> <sup>16</sup> O <sub>5</sub> | 12.5                |

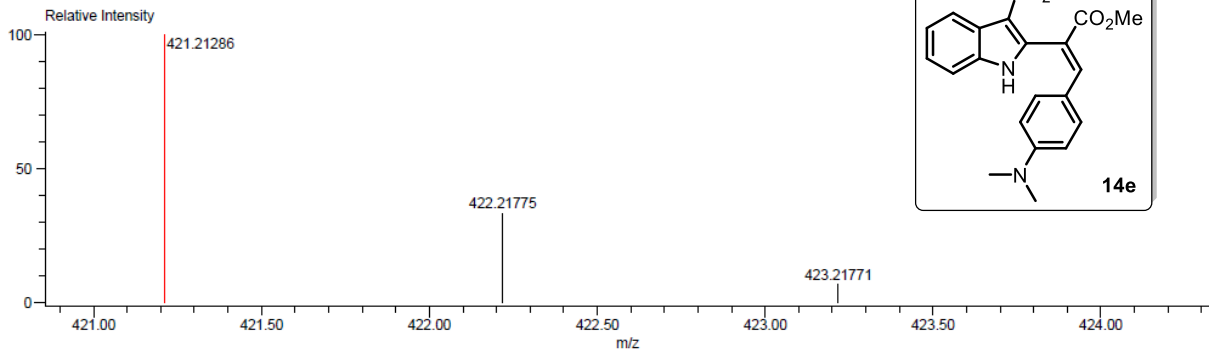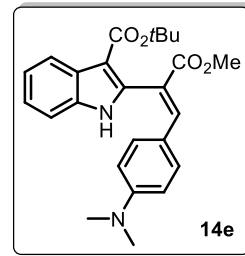

| Mass      | Intensity | Calc. Mass | Mass Difference (mmu) | Mass Difference (ppm) | Possible Formula                                                    | Unsaturation Number |
|-----------|-----------|------------|-----------------------|-----------------------|---------------------------------------------------------------------|---------------------|
| 421.21286 | 24114.33  | 421.21273  | 0.13                  | 0.31                  | $^{12}\text{C}_{25}^{1}\text{H}_{29}^{14}\text{N}_2^{16}\text{O}_4$ | 12.5                |

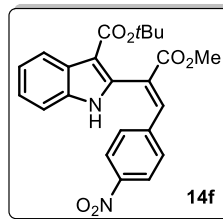

|               |                 |      |    |    |   |   |  |
|---------------|-----------------|------|----|----|---|---|--|
| Observed m/z  | Int%            |      |    |    |   |   |  |
| 422.1457      | 71.19           |      |    |    |   |   |  |
| Estimated m/z | Err [ppm / mmu] | U.S. | C  | H  | N | O |  |
| 1 422.1478    | -4.9 / -2.1     | 14.0 | 23 | 22 | 2 | 6 |  |

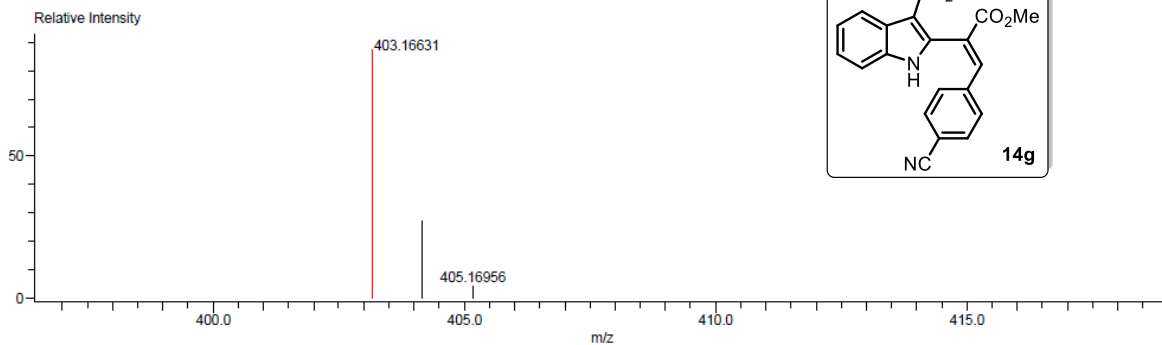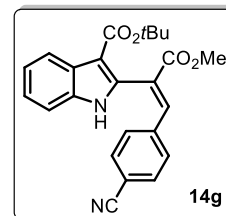

| Mass      | Intensity  | Calc. Mass | Mass Difference (mmu) | Mass Difference (ppm) | Possible Formula                                                    | Unsaturation Number |
|-----------|------------|------------|-----------------------|-----------------------|---------------------------------------------------------------------|---------------------|
| 403.16631 | 3228463.05 | 403.16578  | 0.53                  | 1.32                  | $^{12}\text{C}_{24}^{1}\text{H}_{23}^{14}\text{N}_2^{16}\text{O}_4$ | 14.5                |



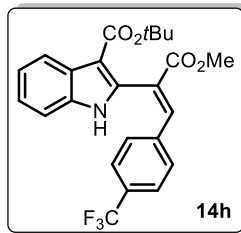

| Observed m/z  | Int%  | Err [ppm / mmu] | U.S.      | C  | H  | F | N | O |
|---------------|-------|-----------------|-----------|----|----|---|---|---|
| 445.1515      | 12.78 |                 |           |    |    |   |   |   |
| Estimated m/z |       |                 |           |    |    |   |   |   |
| 1 445.1501    |       | +3.2 /          | +1.4 13.0 | 24 | 22 | 3 | 1 | 4 |

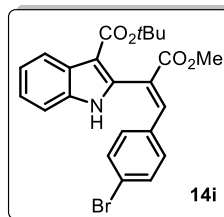

| Observed m/z  | Int%  | Err [ppm / mmu] | U.S.      | C  | H  | <sup>79</sup> Br | <sup>81</sup> Br | N | O |
|---------------|-------|-----------------|-----------|----|----|------------------|------------------|---|---|
| 455.0725      | 97.12 |                 |           |    |    |                  |                  |   |   |
| Estimated m/z |       |                 |           |    |    |                  |                  |   |   |
| 1 455.0732    |       | -1.6 /          | -0.7 13.0 | 23 | 22 | 1                | -                | 1 | 4 |

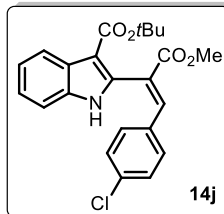

| Observed m/z  | Int%  | Err [ppm / mmu] | U.S.      | C  | H  | <sup>35</sup> Cl | <sup>37</sup> Cl | N | O |
|---------------|-------|-----------------|-----------|----|----|------------------|------------------|---|---|
| 411.1244      | 40.54 |                 |           |    |    |                  |                  |   |   |
| Estimated m/z |       |                 |           |    |    |                  |                  |   |   |
| 1 411.1237    |       | +1.6 /          | +0.7 13.0 | 23 | 22 | 1                | -                | 1 | 4 |

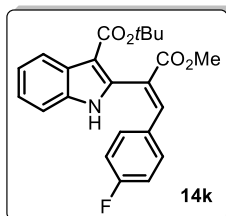

| Observed m/z | Int%  | Estimated m/z | Err [ppm / mmu] | U.S. | C  | H  | F | N | O |
|--------------|-------|---------------|-----------------|------|----|----|---|---|---|
| 395.1538     | 24.47 |               |                 |      |    |    |   |   |   |
| 1 395.1533   |       |               | +1.3 / +0.5     | 13.0 | 23 | 22 | 1 | 1 | 4 |

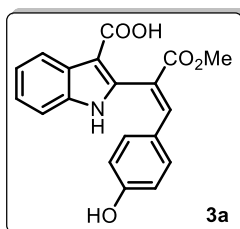

| Observed m/z | Int%  | Estimated m/z | Err [ppm / mmu] | U.S. | C  | H  | N | O |
|--------------|-------|---------------|-----------------|------|----|----|---|---|
| 337.0937     | 56.18 |               |                 |      |    |    |   |   |
| 1 337.0950   |       |               | -3.9 / -1.3     | 13.0 | 19 | 15 | 1 | 5 |

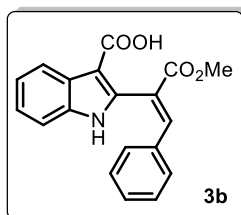

| Observed m/z | Int%  | Estimated m/z | Err [ppm / mmu] | U.S. | C  | H  | N | O |
|--------------|-------|---------------|-----------------|------|----|----|---|---|
| 321.0989     | 20.32 |               |                 |      |    |    |   |   |
| 1 321.1001   |       |               | -3.8 / -1.2     | 13.0 | 19 | 15 | 1 | 4 |

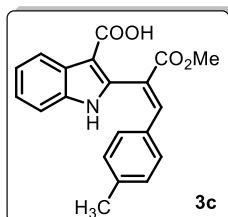

| Observed m/z | Int%   | Estimated m/z | Err [ppm / mmu] | U.S. | C  | H  | N | O |
|--------------|--------|---------------|-----------------|------|----|----|---|---|
| 335.1151     | 100.00 |               |                 |      |    |    |   |   |
| 1 335.1158   |        |               | -2.0 / -0.7     | 13.0 | 20 | 17 | 1 | 4 |

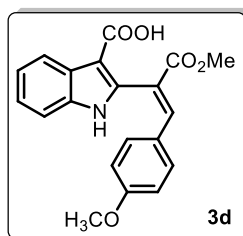

| Observed m/z | Int%  | Estimated m/z | Err [ppm / mmu] | U.S. | C  | H  | N | O |
|--------------|-------|---------------|-----------------|------|----|----|---|---|
| 351.1117     | 28.54 |               |                 |      |    |    |   |   |
| 1 351.1107   |       |               | +2.9 / +1.0     | 13.0 | 20 | 17 | 1 | 5 |

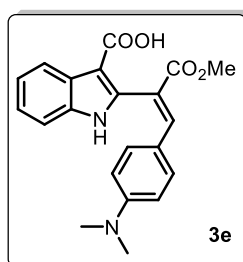

| Observed m/z | Int%  | Estimated m/z | Err [ppm / mmu] | U.S. | C  | H  | N | O |
|--------------|-------|---------------|-----------------|------|----|----|---|---|
| 364.1435     | 89.95 |               |                 |      |    |    |   |   |
| 1 364.1423   |       |               | +3.3 / +1.2     | 13.0 | 21 | 20 | 2 | 4 |

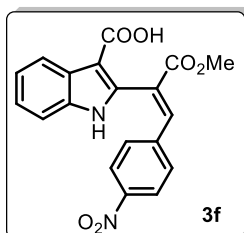

|   | Observed m/z              | Int%  | Err [ppm / mmu] | U.S. | C  | H  | N | O |
|---|---------------------------|-------|-----------------|------|----|----|---|---|
|   | 366.0848                  | 24.54 |                 |      |    |    |   |   |
| 1 | Estimated m/z<br>366.0852 |       | -1.1 / -0.4     | 14.0 | 19 | 14 | 2 | 6 |

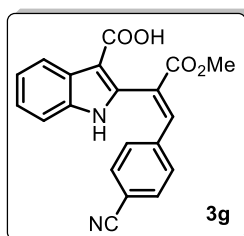

|   | Observed m/z              | Int%  | Err [ppm / mmu] | U.S. | C  | H  | N | O |
|---|---------------------------|-------|-----------------|------|----|----|---|---|
|   | 346.0966                  | 25.45 |                 |      |    |    |   |   |
| 1 | Estimated m/z<br>346.0954 |       | +3.6 / +1.2     | 15.0 | 20 | 14 | 2 | 4 |

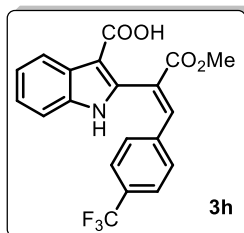

|   | Observed m/z              | Int%   | Err [ppm / mmu] | U.S. | C  | H  | F | N | O |
|---|---------------------------|--------|-----------------|------|----|----|---|---|---|
|   | 389.0878                  | 100.00 |                 |      |    |    |   |   |   |
| 1 | Estimated m/z<br>389.0875 |        | +0.8 / +0.3     | 13.0 | 20 | 14 | 3 | 1 | 4 |

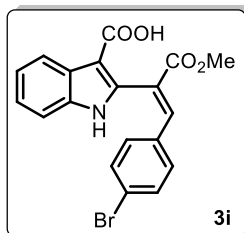

| Observed m/z  | Int%  | Err[ppm / mmu] | U.S. | C  | H  | 79Br | 81Br | N | O |
|---------------|-------|----------------|------|----|----|------|------|---|---|
| 399.0103      | 24.58 | -0.8 / -0.3    | 13.0 | 19 | 14 | 1    | -    | 1 | 4 |
| Estimated m/z |       |                |      |    |    |      |      |   |   |
| 1 399.0106    |       |                |      |    |    |      |      |   |   |

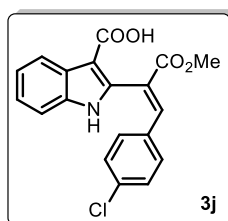

| Observed m/z  | Int%  | Err[ppm / mmu] | U.S. | C  | H  | 35Cl | 37Cl | N | O |
|---------------|-------|----------------|------|----|----|------|------|---|---|
| 355.0603      | 35.06 | -2.4 / -0.8    | 13.0 | 19 | 14 | 1    | -    | 1 | 4 |
| Estimated m/z |       |                |      |    |    |      |      |   |   |
| 1 355.0611    |       |                |      |    |    |      |      |   |   |

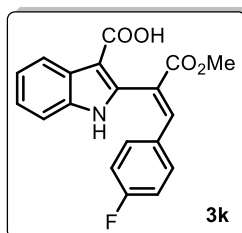

| Observed m/z  | Int%   | Err[ppm / mmu] | U.S. | C  | H  | F | N | O |
|---------------|--------|----------------|------|----|----|---|---|---|
| 339.0895      | 100.00 | -3.5 / -1.2    | 13.0 | 19 | 14 | 1 | 1 | 4 |
| Estimated m/z |        |                |      |    |    |   |   |   |
| 1 339.0907    |        |                |      |    |    |   |   |   |

## 10. HPLC chromatograms

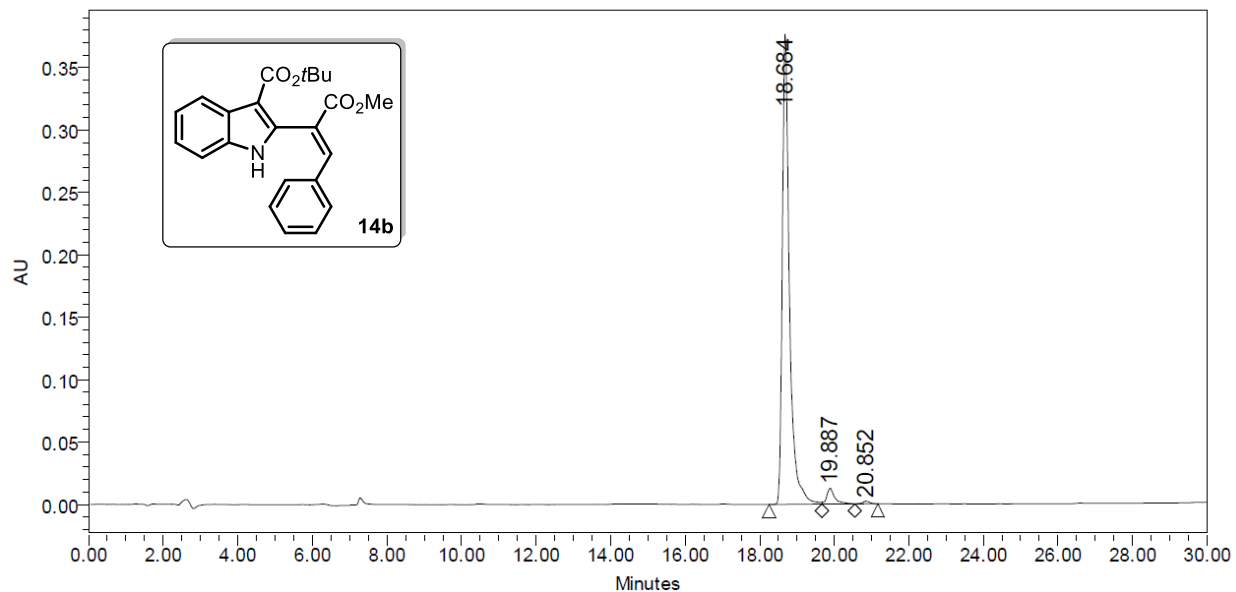

### Peak Results

|   | Name | RT     | Area    | % Area | Int Type | Processed Channel Descr. | Width (sec) |
|---|------|--------|---------|--------|----------|--------------------------|-------------|
| 1 |      | 18.684 | 5010237 | 95.80  | BV       | PDA 254.0 nm             | 85.000      |
| 2 |      | 19.887 | 190286  | 3.64   | VV       | PDA 254.0 nm             | 53.000      |
| 3 |      | 20.852 | 29373   | 0.56   | VB       | PDA 254.0 nm             | 37.000      |

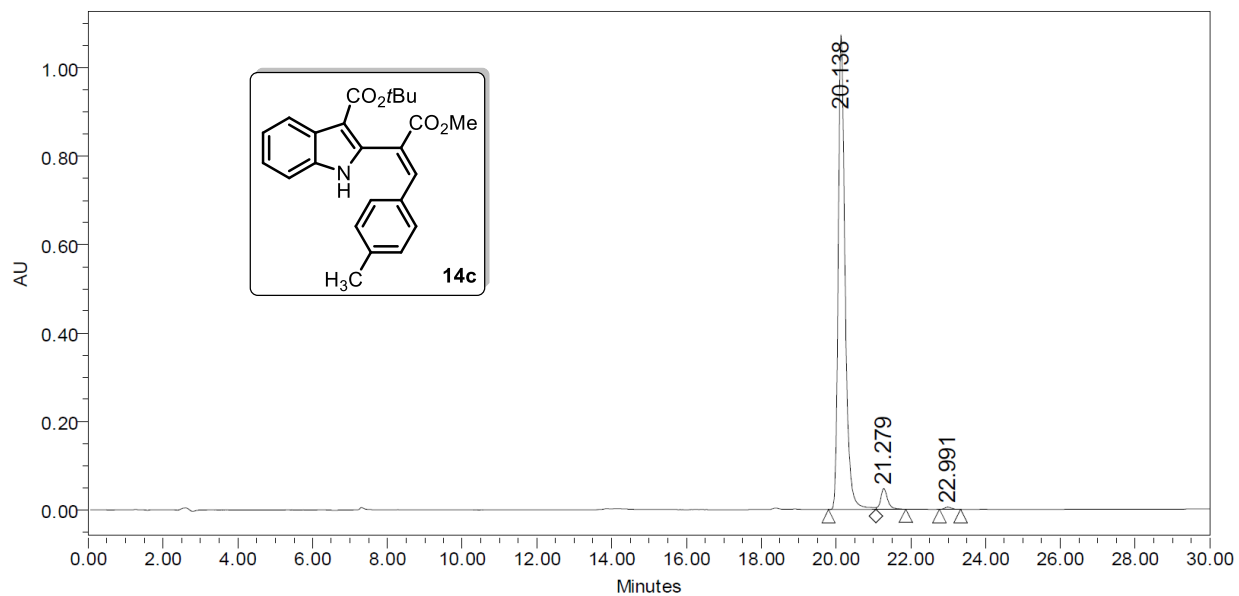

### Peak Results

|   | Name | RT     | Area     | % Area | Int Type | Processed Channel Descr. | Width (sec) |
|---|------|--------|----------|--------|----------|--------------------------|-------------|
| 1 |      | 20.138 | 13684971 | 95.38  | BV       | PDA 254.0 nm             | 76.000      |
| 2 |      | 21.279 | 598310   | 4.17   | VB       | PDA 254.0 nm             | 48.000      |
| 3 |      | 22.991 | 64955    | 0.45   | BB       | PDA 254.0 nm             | 34.000      |

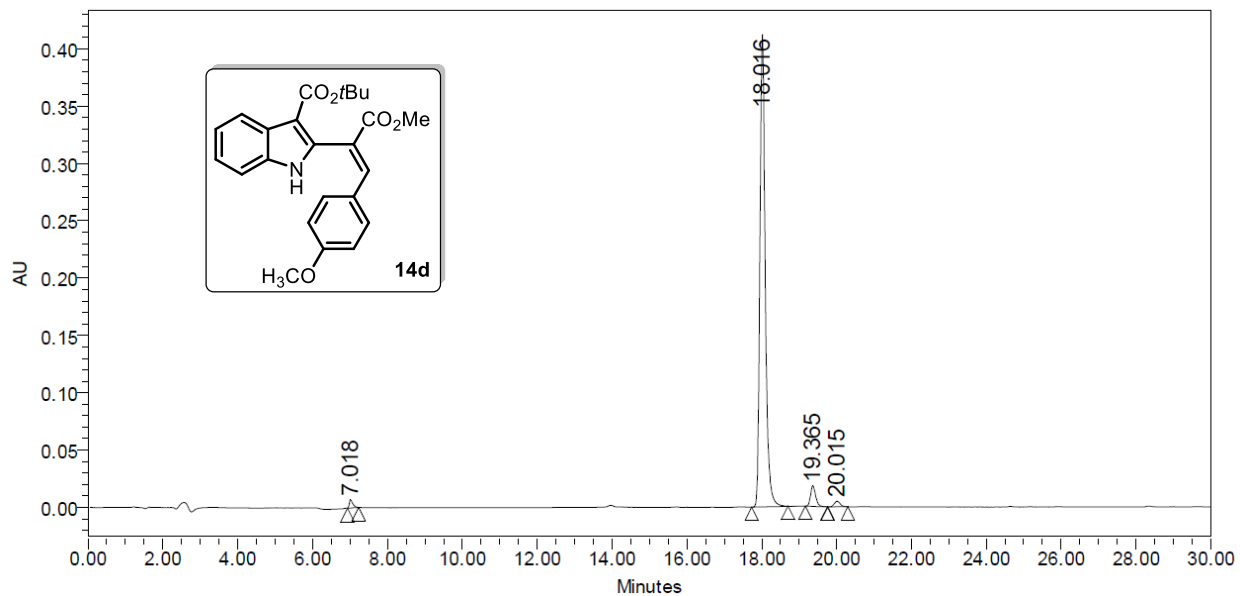

### Peak Results

|   | Name | RT     | Area    | % Area | Int Type | Processed Channel Descr. | Width (sec) |
|---|------|--------|---------|--------|----------|--------------------------|-------------|
| 1 |      | 7.018  | 48204   | 1.11   | bb       | PDA 254.0 nm             | 18.000      |
| 2 |      | 18.016 | 4090395 | 93.88  | BB       | PDA 254.0 nm             | 58.000      |
| 3 |      | 19.365 | 167928  | 3.85   | BB       | PDA 254.0 nm             | 35.000      |
| 4 |      | 20.015 | 50525   | 1.16   | BB       | PDA 254.0 nm             | 32.000      |



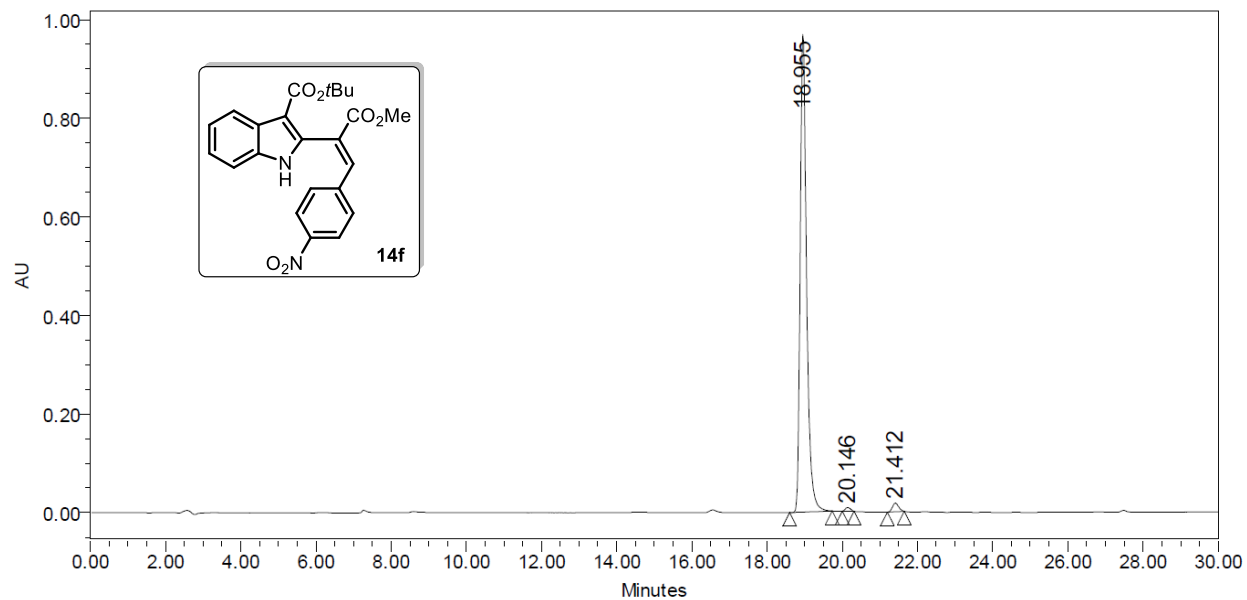

### Peak Results

|   | Name | RT     | Area     | % Area | Int Type | Processed Channel Descr. | Width (sec) |
|---|------|--------|----------|--------|----------|--------------------------|-------------|
| 1 |      | 18.955 | 11416738 | 97.67  | Bb       | PDA 254.0 nm             | 68.000      |
| 2 |      | 20.146 | 71027    | 0.61   | bb       | PDA 254.0 nm             | 19.000      |
| 3 |      | 21.412 | 201089   | 1.72   | bb       | PDA 254.0 nm             | 27.000      |

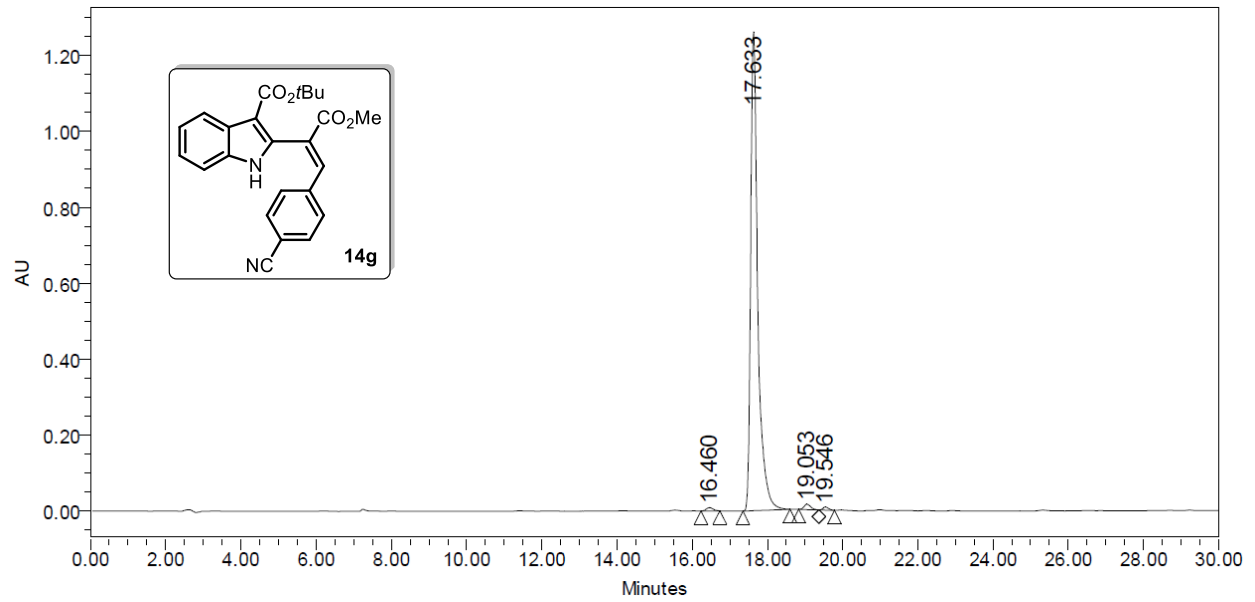

### Peak Results

|   | Name | RT     | Area     | % Area | Int Type | Processed Channel Descr. | Width (sec) |
|---|------|--------|----------|--------|----------|--------------------------|-------------|
| 1 |      | 16.460 | 111930   | 0.66   | Bb       | PDA 254.0 nm             | 30.000      |
| 2 |      | 17.633 | 16525331 | 97.84  | BB       | PDA 254.0 nm             | 75.000      |
| 3 |      | 19.053 | 170395   | 1.01   | BV       | PDA 254.0 nm             | 32.000      |
| 4 |      | 19.546 | 82574    | 0.49   | VB       | PDA 254.0 nm             | 25.000      |

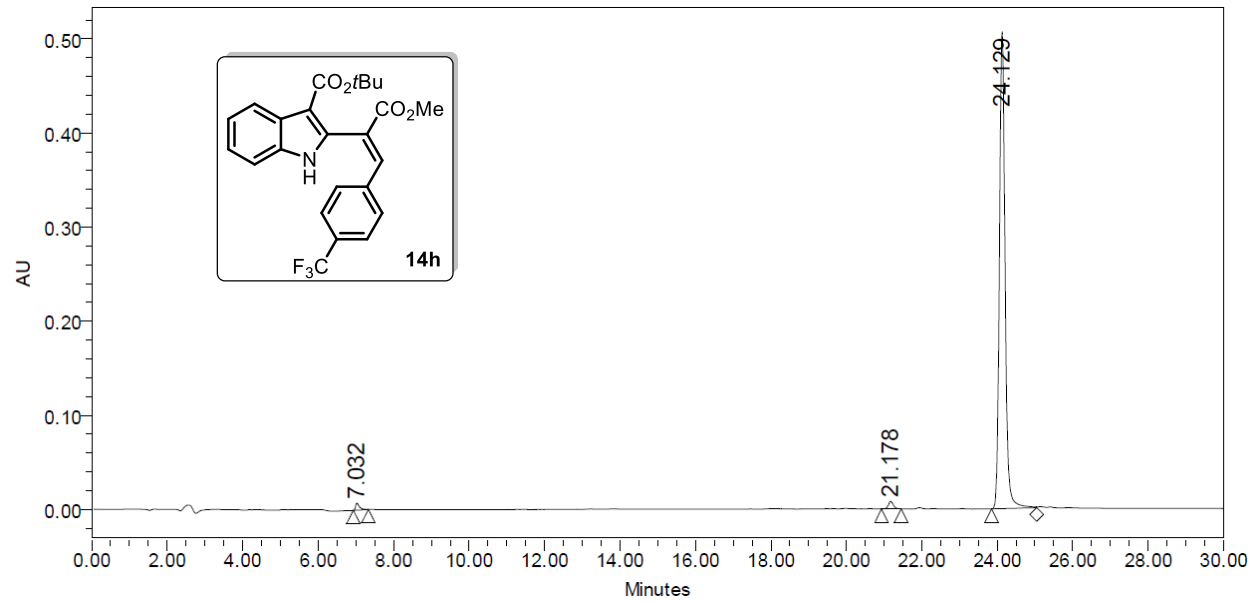

### Peak Results

|   | Name | RT     | Area    | % Area | Int Type | Processed Channel Descr. | Width (sec) |
|---|------|--------|---------|--------|----------|--------------------------|-------------|
| 1 |      | 7.032  | 53003   | 0.98   | BB       | PDA 254.0 nm             | 24.000      |
| 2 |      | 21.178 | 73285   | 1.36   | BB       | PDA 254.0 nm             | 31.000      |
| 3 |      | 24.129 | 5276910 | 97.66  | BV       | PDA 254.0 nm             | 72.000      |

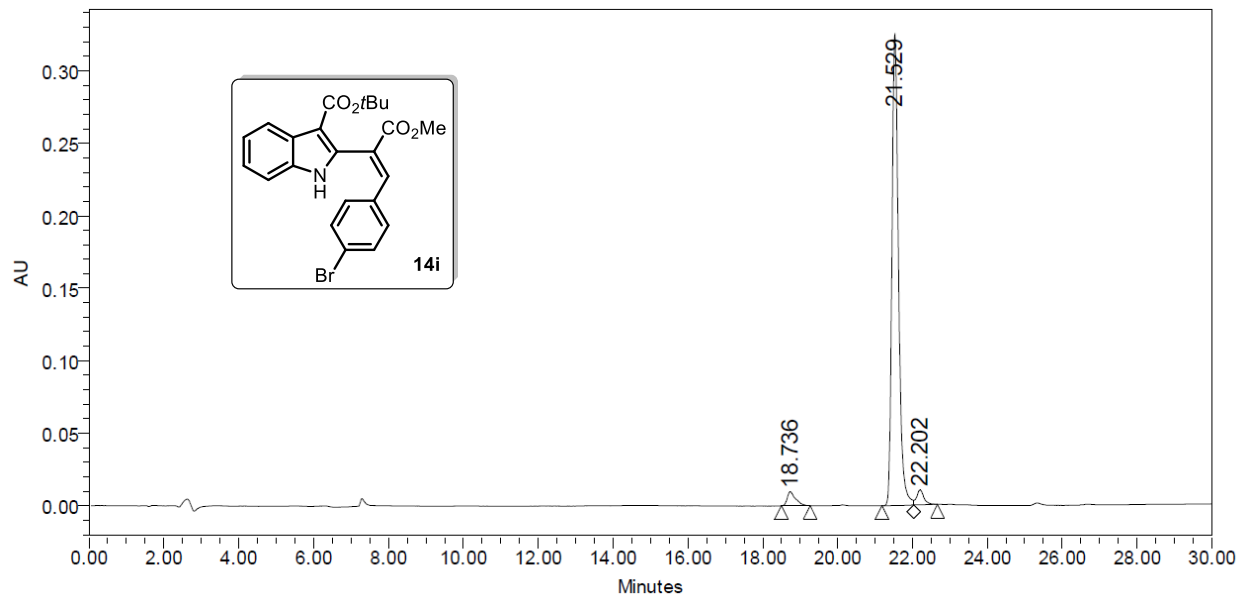

### Peak Results

|   | Name | RT     | Area    | % Area | Int Type | Processed Channel Descr. | Width (sec) |
|---|------|--------|---------|--------|----------|--------------------------|-------------|
| 1 |      | 18.736 | 149678  | 3.52   | BB       | PDA 254.0 nm             | 46.000      |
| 2 |      | 21.529 | 3958231 | 93.18  | BV       | PDA 254.0 nm             | 51.000      |
| 3 |      | 22.202 | 140225  | 3.30   | VB       | PDA 254.0 nm             | 38.000      |

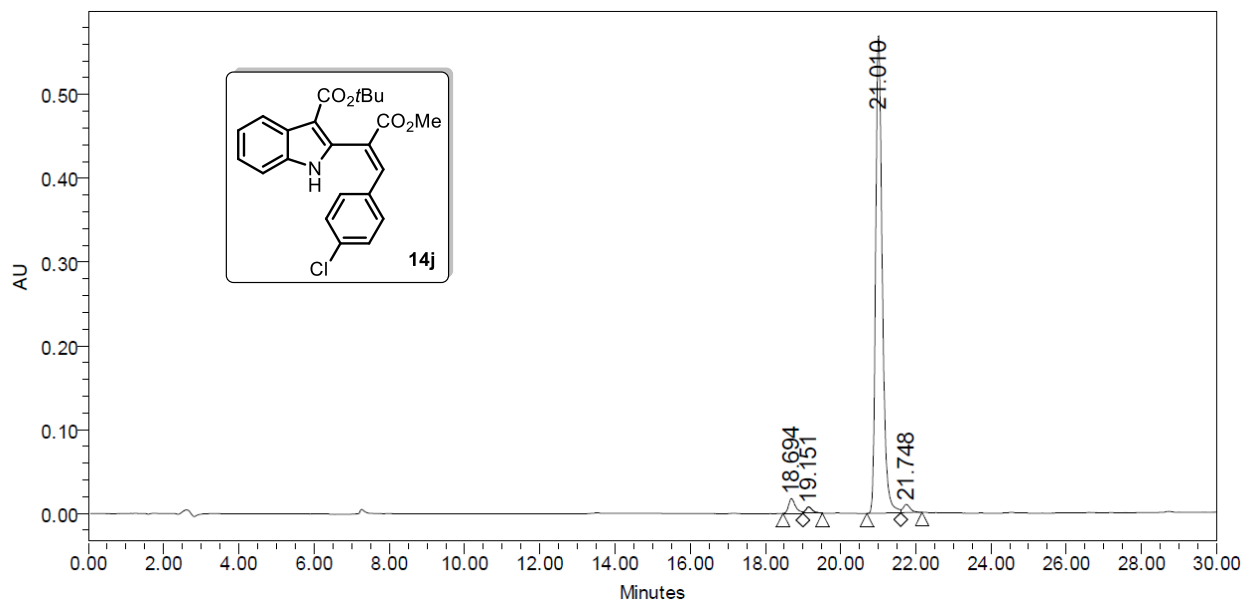

### Peak Results

|   | Name | RT     | Area    | % Area | Int Type | Processed Channel Descr. | Width (sec) |
|---|------|--------|---------|--------|----------|--------------------------|-------------|
| 1 |      | 18.694 | 228904  | 3.07   | bV       | PDA 254.0 nm             | 32.000      |
| 2 |      | 19.151 | 95221   | 1.28   | Vb       | PDA 254.0 nm             | 31.000      |
| 3 |      | 21.010 | 7001127 | 93.91  | BV       | PDA 254.0 nm             | 54.000      |
| 4 |      | 21.748 | 130256  | 1.75   | VB       | PDA 254.0 nm             | 34.000      |

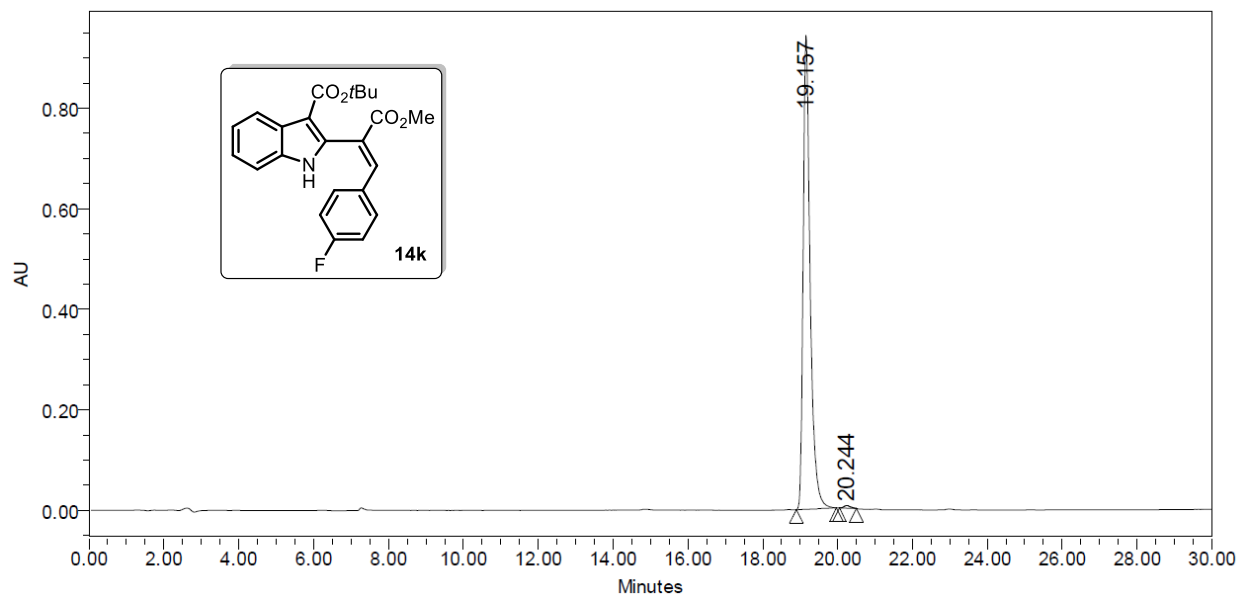

### Peak Results

|   | Name | RT     | Area     | % Area | Int Type | Processed Channel Descr. | Width (sec) |
|---|------|--------|----------|--------|----------|--------------------------|-------------|
| 1 |      | 19.157 | 12200907 | 99.47  | bb       | PDA 254.0 nm             | 64.000      |
| 2 |      | 20.244 | 64578    | 0.53   | bb       | PDA 254.0 nm             | 27.000      |

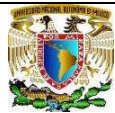

## Laboratorio de Cromatografía Condiciones Cromatográficas

### Muestras:

|        |               |
|--------|---------------|
| ARV-10 | 210823-tor-01 |
| ARV-03 | 210823-tor-02 |
| ARV-06 | 210823-tor-03 |
| ARV-12 | 210823-tor-04 |
| ARV-05 | 210823-tor-05 |
| ARV-08 | 210823-tor-06 |
| ARV-07 | 210823-tor-07 |

### Cromatógrafo de Líquidos

Agilent 1200

### Detector

UV-Vis Arreglo de diodos Waters 2996

### Columna

Luna 3  $\mu\text{m}$  C18(2) 100 Å 100 x 2 mm

| Eluyente | Acetonitrilo | Agua 0.1% Ácido acético |
|----------|--------------|-------------------------|
| inicial  | 30           | 70                      |
| 30 min   | 100          | 0                       |

### Flujo

0.2 mL/min

### Longitud de onda del cromatograma

254 nm

### Disolvente de la muestra

Diclorometano

Fecha 25-08-2021

Analizó: M. en C. Lucero Rios

Revisó: M. en C. Carmen Márquez
